# Supplementary material
Source: Research Square preprint supplement (doi:10.21203/rs.3.rs-7211523/v1)
Supplement: Supplementary file 2 [file 931adde176fa9515929c556d.docx]

**Supporting Information for**

**Phylogeny shapes a global spectrum of leaf nitrogen allocation allocation**

Erqian Cui1,2, Songbo Tang1,2, Jianyang Xia1,2*

**Affiliations:**

1Research Center for Global Change and Ecological Forecasting, Zhejiang Tiantong Forest Ecosystem National Observation and Research Station, School of Ecological and Environmental Sciences, East China Normal University, Shanghai, China

2Institute of Eco-Chongming, East China Normal University, Shanghai, China

***Corresponding author:** Jianyang Xia (jyxia@des.ecnu.edu.cn)

**The PDF file includes:**

Supplementary Note 1 | Description of the database

Supplementary Note 2 | Data preprocessing

Supplementary Figure S1 to S7

Supplementary Table S1 to S3

References for Supplementary Information

The literatures list for the database

**Supplementary Note 1 | Description of the database**

Nitrogen (N) is a major constituent of proteins for biological processes. To optimize growth and ensure survival under specific environmental conditions, plants need to balance N investment in proteins for different biological processes. We hypothesize that the fractional allocation of leaf nitrogen to these processes varies with leaf N concentration, reflecting adaptive shifts in plant strategy as nitrogen availability changes. Leaf N is broadly partitioned into two major pools: functional pool and structural pool (Xu et al., 2012). Functional N is subdivided into photosynthetic N (principally allocated to Rubisco, electron transport, and light capture), respiratory N, and storage N. Structural N is mainly utilized for building cell walls. Respiratory N is defined as the N invested in mitochondrial respiratory enzymes to generate energy to support growth and tissue maintenance. However, previous studies indicate that the proportion of respiratory N is quite low, constituting only about 2% of the total leaf N (Ghimire et al., 2017). Storage N is calculated as the total N pool minus the sum of structural, photosynthetic, and respiratory N. The storage N pool is primarily utilized for the production of new plant tissues and seeds. Therefore, the N pools that predominantly govern existing leaf function are photosynthetic N and structural N.

Here, we mainly focus on the allocation of leaf N to a range of photosynthetic and structural proteins, including ribulose-1,5-bisphosphate carboxylase-oxygenase enzyme carboxylation (mainly Rubisco, PR), bioenergetics (i.e., electron transport, PB), light capture by chlorophyll (PL), and cell wall structure (Pcw). In the current literature, leaf N allocation is estimated primarily through two complementary approaches: direct extraction method (e.g., spectrophotometric quantification of key proteins like Rubisco, cell wall) and trait-based modeling (e.g., mechanistic partitioning models inferred from gas exchange and chlorophyll fluorescence data).

The chemical extraction method is mainly used to extract nitrogen in Rubisco, chlorophyll for light capture, the cytochrome f complex involved in electron transport, and the cell walls. The concentrations of chlorophyll and Rubisco were determined from frozen leaf discs. A disc was homogenized in a protective extraction buffer, and the resulting homogenate was filtered. Chlorophyll in the filtrate was extracted with acetone and quantified spectrophotometrically. For Rubisco quantification, the same filtrate was separated by SDS-PAGE, stained, and the band corresponding to the large subunit was excised and eluted for spectrophotometric determination (Takashima et al., 2004). The quantification of cytochrome f involves a two-step biochemical procedure. First, thylakoid membrane proteins are isolated from leaf samples. Subsequently, the protein extract is separated by sodium dodecyl sulfate-polyacrylamide gel electrophoresis (SDS-PAGE). The cytochrome f content is then determined either by immunoblotting or by direct spectrophotometric assay based on its characteristic heme absorbance (Niinemets & Tenhunen, 1997). Cell wall nitrogen was quantified by isolating the cell wall fraction from leaf homogenates through sequential washing with buffer, water, and a phenol-acetic acid-water (PAW) solvent to remove non-structural proteins and contaminants. The purified cell wall residue was dried, and its dry mass and nitrogen content were then measured to determine cell wall mass and N concentration (Hikosaka et al., 2009).

For trait-based modeling, the fractions of total leaf N allocated to carboxylation (e.g., Rubisco), bioenergetics (electron transport components), and light capture complexes were estimated following the framework established by Niinemets and Tenhunen (1997). Meanwhile, different improved versions of the above calculation method have evolved based on the availability of trait parameters (Evans and Poorter (2001)). The ecological mechanism and specific formula of trait-based modeling are as follows:

Rubisco is the dominant protein within the Calvin cycle enzymes; therefore, Calvin cycle activity is considered proportional to Rubisco activity. With knowledge of the specific activity of Rubisco, i.e. the maximum rate of RUBP carboxylation per unit Rubisco protein, and provided all leaf Rubisco is in the fully activated state, the maximum rate of carboxylation per unit leaf area can be determined by,

Then, the index PR defined as the proportion of total leaf nitrogen allocated to Rubisco (g N in Rubisco (g total leaf N)-1) is given by,

Where (μmol CO2 m-2 s-1) is the maximum carboxylation rate of Rubisco enzyme, (μmol CO2 g-1 RuBisCO s-1) is the specific activity of Rubisco, is leaf nitrogen content (g N m-2), and 6.25 is the mass ratio of Rubisco molecule to N in Rubisco molecule (g RuBisCO g-1 N). At leaf temperature of 25°C, equals 20.78 μmol CO2 g-1 Rubisco s-1 at leaf temperature of 25°C.

Leaf N investment in bioenergetics determines the protein content limiting the capacity for photosynthetic electron transport and photophosphorylation. The index PB therefore reflects variations in the abundance of three principal proteins that limit the electron transport rate: cytochrome f, ferredoxin NADP⁺ reductase, and the coupling factor (Evans & Seemann, 1989). The maximum rate of electron transport per unit leaf area can be determined by,

Then, the index PB defined as the proportion of total leaf nitrogen allocated to electron transport (g N in bioenergetics (g total leaf N)-1) is given by,

Where (μmol electron m-2 s-1) is the maximum electron transport rate, (μmol electron μmol-1 cytochrome f s-1 ) is the potential rate of photosynthetic electron transport per unit cytochrome f. Considering a constant 1:1:1.2 molar ratio for cyt f: FNR: CF, the investment in bioenergetics is at least 0.124 g N (μmol cyt f)-1. Consequently, the protein content can be derived from nitrogen content using the conversion factor of 8.06 μmol cyt f (g N in bioenergetics)⁻¹. At leaf temperature of 25°C, equals 156 μmol electron μmol-1 cytochrome f s-1.

Leaf N investment in light capture determines the content of chlorophyll a/b protein complexes associated with photosystems Ⅰ (PSI) and II (PSII). Then, the index PL defined as the proportion of total leaf nitrogen allocated to light capture (g N in chlorophyll (g total leaf N)-1) is given by

where is the chlorophyll content (mmol chlorophyll/m2) and (1.78 mmol chlorophyll g-1 N in chlorophyll) is the amount of nitrogen in chlorophyll molecule.

The fractions of the total leaf nitrogen allocated to Rubisco, bioenergetics and light capture components of the photosynthetic apparatus determined based on the approach by Niinemets and Tenhunen (1997). Based on the keywords "((TS=(leaf)) OR TS=(foliar)) AND (((TS=(nitrogen allocation)) OR TS=(nitrogen fraction)) OR TS=(nitrogen partitioning))", a total of 157 literatures from Web of Science (http://webofscience.com) and Google Schoolar (https://scholar.google.com) have been compiled in our database. The literature list is attached at the end ([1]-[157]). For each study, the data was directly obtained from the text, tables, and supplementary materials of the literature, or acquired from graphics using GetData Graph Digitizer v2.26. Following a systematic screening process, we compiled a total of 1,260 individual-level observations. Along with the N fractions value, we also recorded the corresponding sample size, variance, and sampling year for each observation. To prevent the overrepresentation of multiple observations for a single species from a single study, we calculated a site-specific mean for each species, defining this unit as a population. The population-level sample sizes for each N fraction as follows: 706 PR, 539 for PB, 512 PL, and 167 PCW. To construct the phylogenetic analyses, these population-level data were further averaged to the species level. Consequently, our final database included data for 520 species from 99 families. The corresponding species-level sample sizes were: 516 species for PR, 396 for PB, 378 for PL, and 123 for PCW.

**Supplementary Note 2 |** **Data preprocessing**

The collected data are pre-processed using the following criteria: (1) Not all data are presented directly in terms of leaf nitrogen fractions. If the articles report the associated leaf traits (i.e., *V*cmax, *J*max, and leaf chlorophyll content), we then calculate the fractions of the total leaf nitrogen allocated to carboxylation, bioenergetics and light capture components based on the approach by Niinemets and Tenhunen (1997). (2) Some studies have only explored the nitrogen allocation associated with certain specific functions. Therefore, in order to minimize publication bias caused by different data sources, we only included studies that reported data for at least two of the four major leaf N components in this analysis. (3) All measurements were compiled from studies conducted under ambient (non-manipulated) conditions. For studies that included experimental manipulations (e.g., warming, nitrogen addition, or CO₂ enrichment), only data from the control groups were used to establish the baseline patterns. Observations from treatment groups in manipulation experiments were used solely to quantify intraspecific responses to environmental changes (Supplementary Figure 6). (4) Taking into account the statistical assumption of independence among observations, we used only the site-specific mean value for a given species. Given that all the analyses in this study were carried out at the species level, for species found at more than one sampling location, we computed the mean values of each leaf nitrogen fraction at the species level.


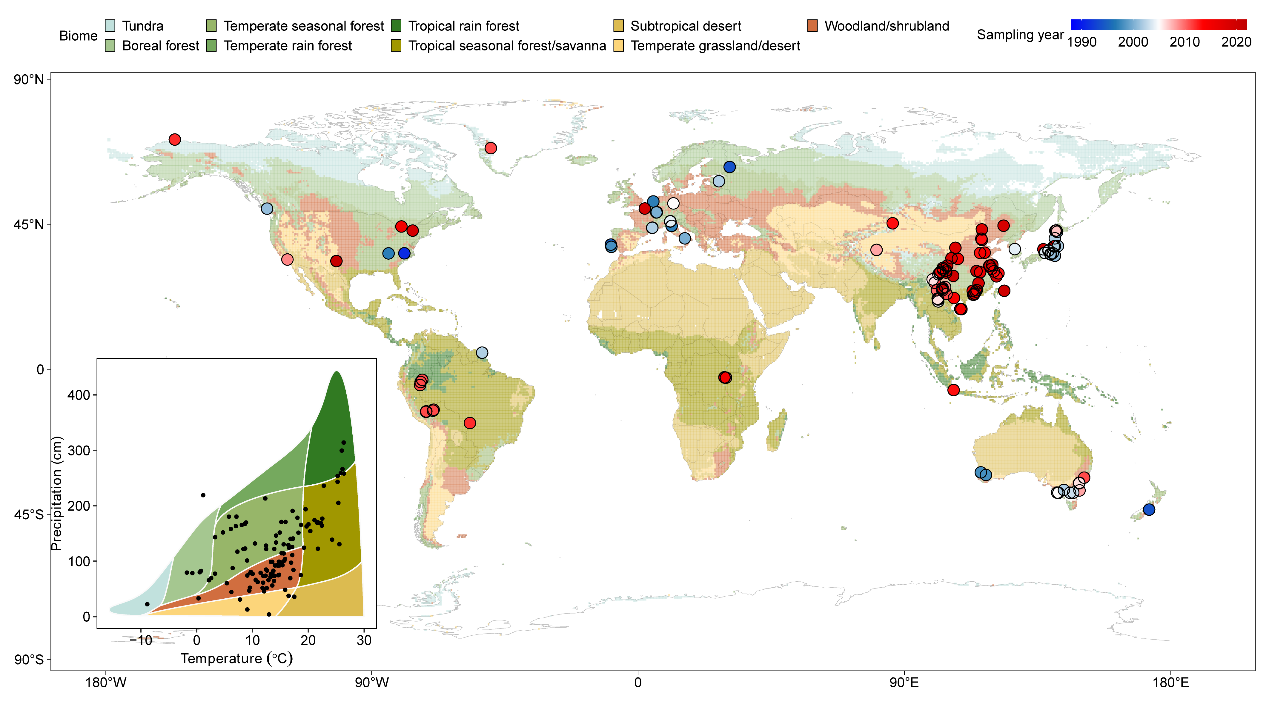


**Supplementary Figure 1.** Geographic distribution of the locations included in this study. The geographic distribution of study sites is shown with the map background colored by biome type and the circles colored by sampling year. The insert panel illustrates the spatial distributions of locations across the Whittaker biomes along climatic gradients.


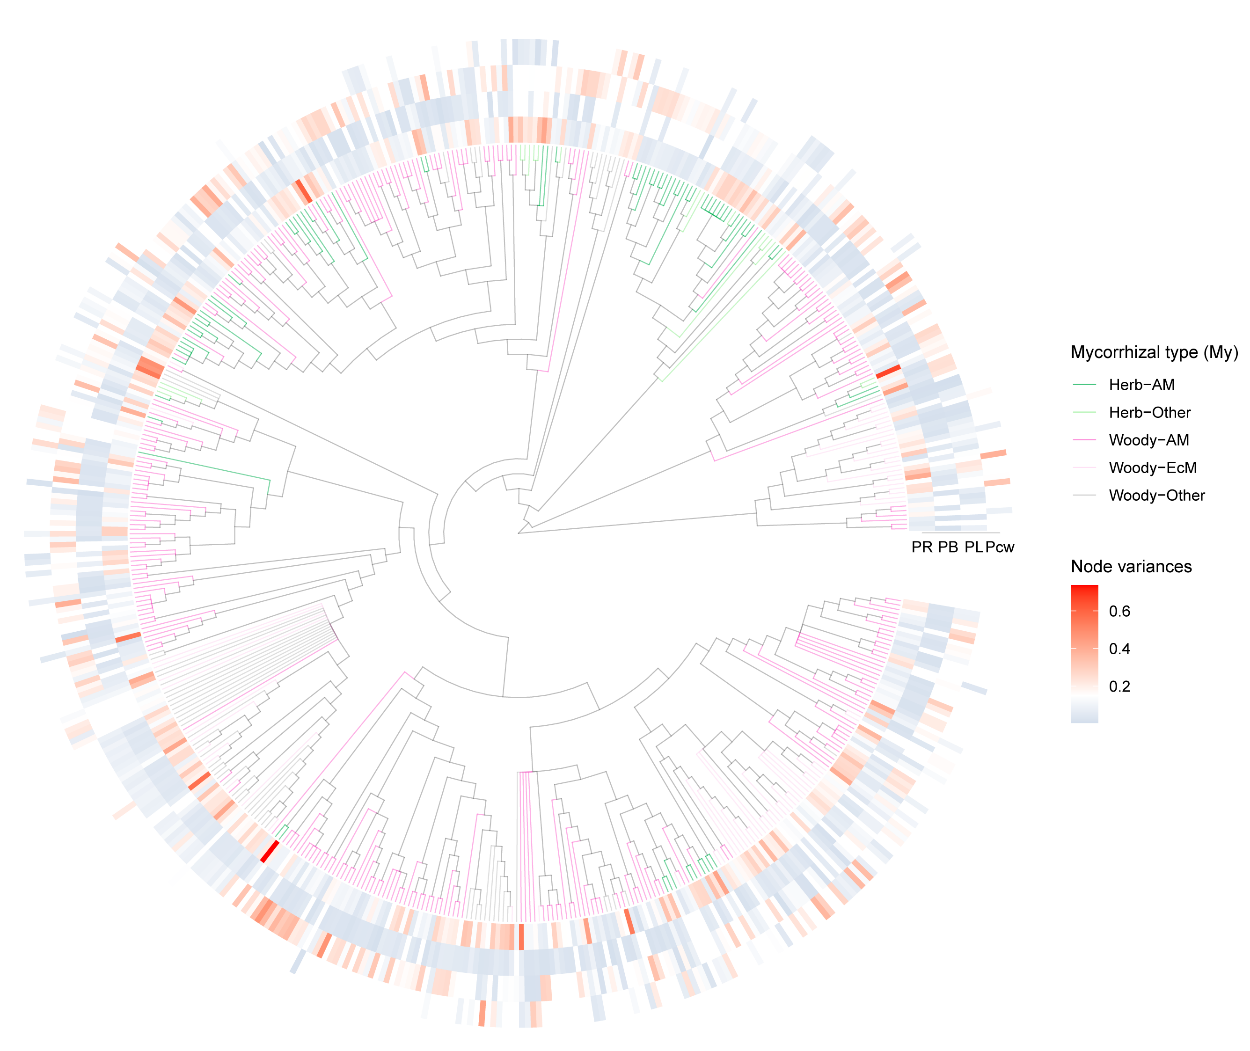


**Supplementary Figure 2.** Phylogenetic signal heterogeneity was characterized using node-specific variation across the phylogeny. A larger node-specific variation suggests a weakening or breakdown of phylogenetic conservatism for that trait within the clade originating from that node.


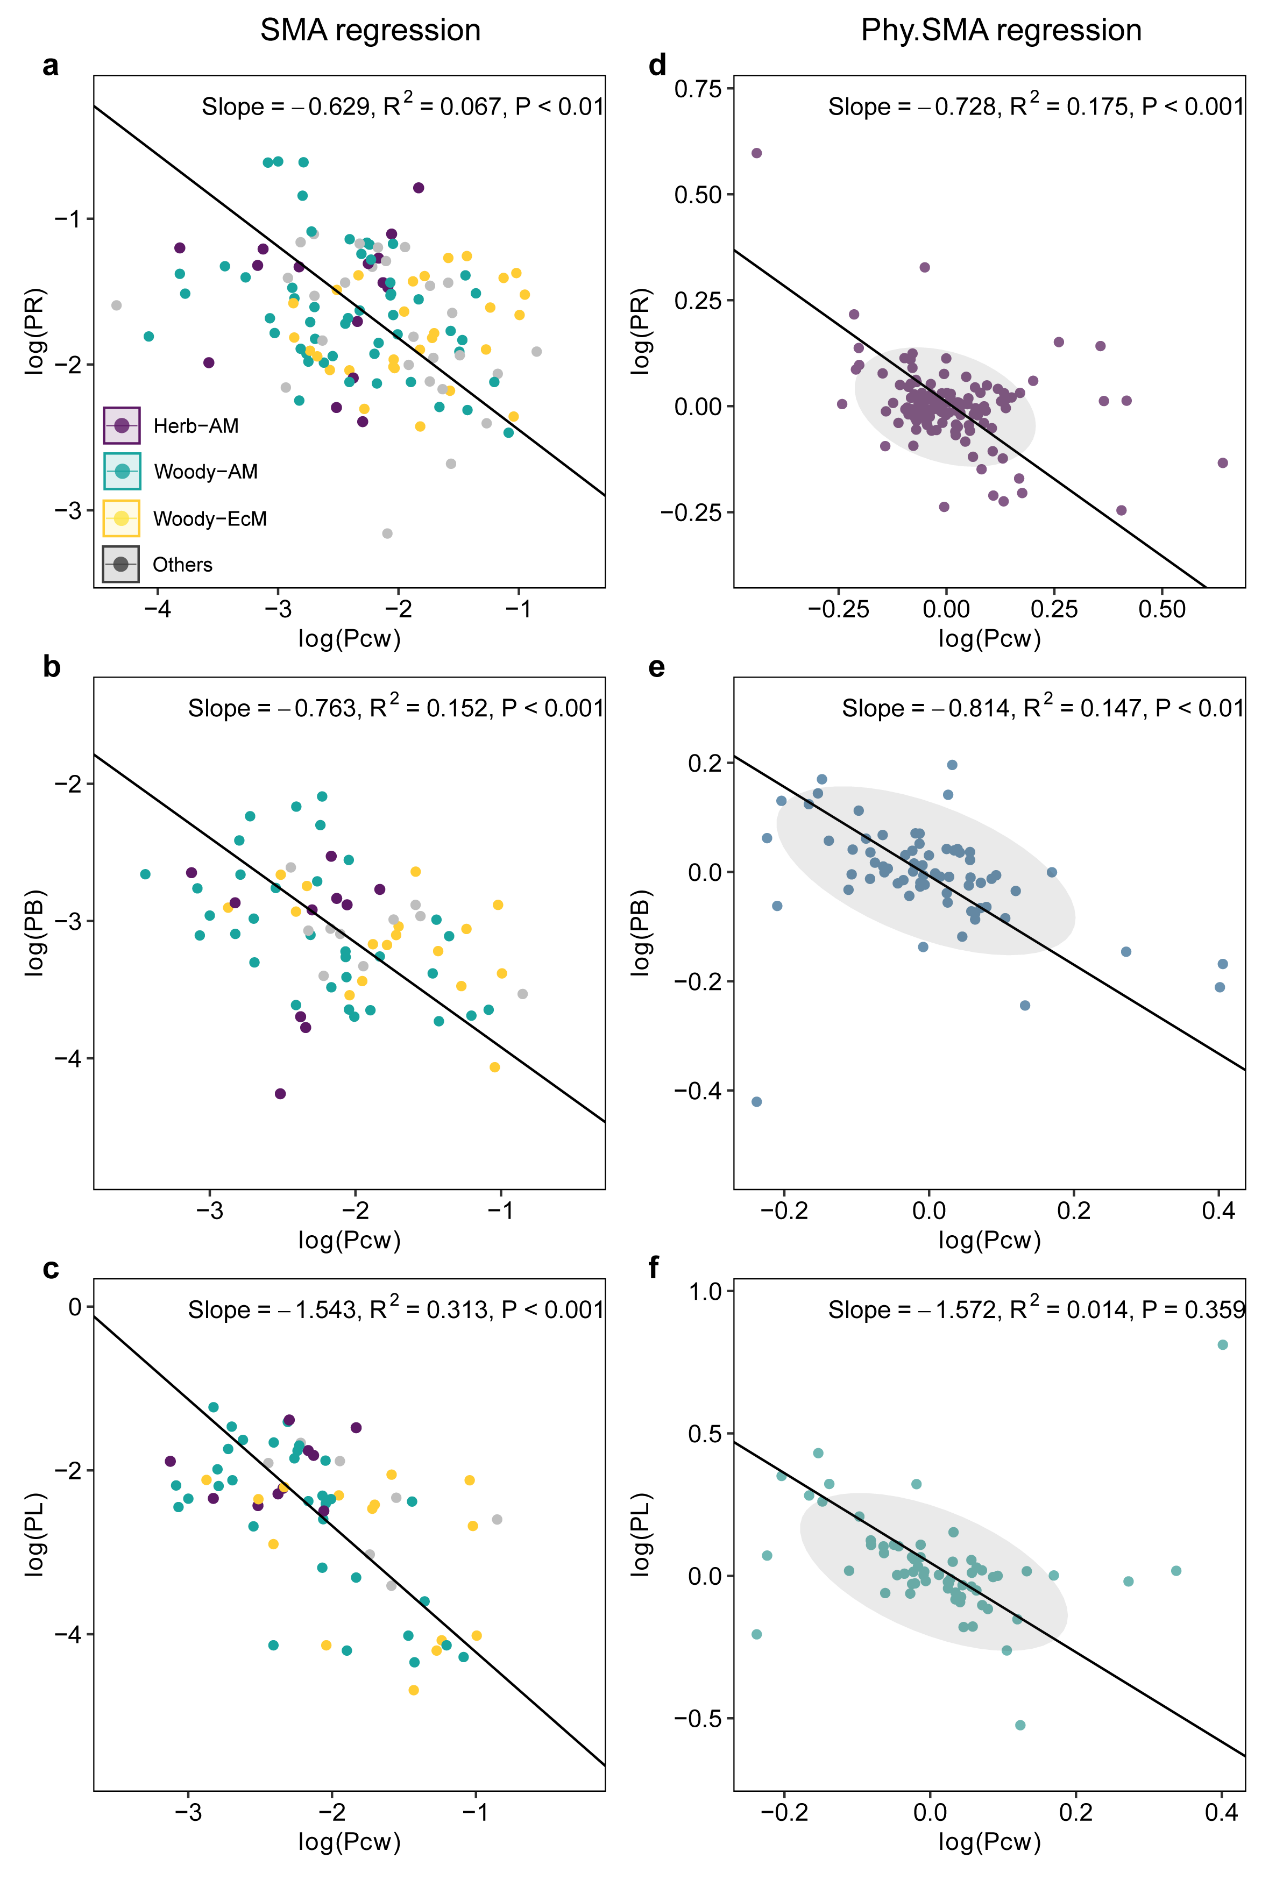


**Supplementary Figure 3.** Relationships between leaf N allocation to photosynthetic apparatus (Rubisco, electron transport, light absorption) and cell wall structures. a-c, The results of standardized major axis (SMA) regression. d-f, The results of phylogenetic SMA (Phy.SMA) regression.


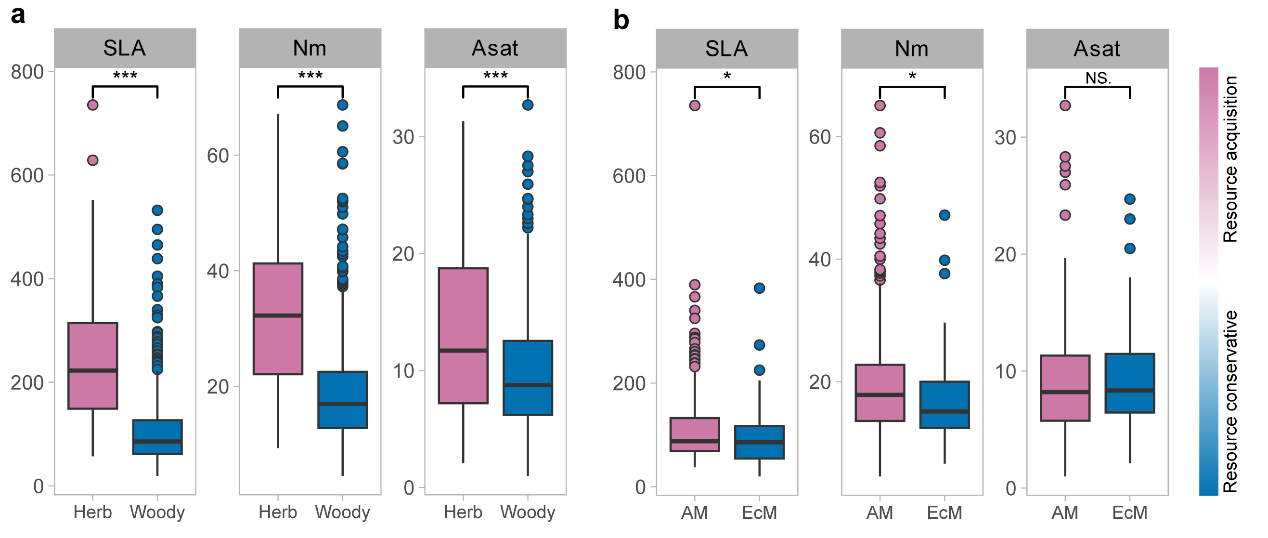


**Supplementary Figure 4.** Comparison of leaf economic traits between life forms and mycorrhizal types. **P* < 0.05, ***P* < 0.01 and ****P* < 0.001.


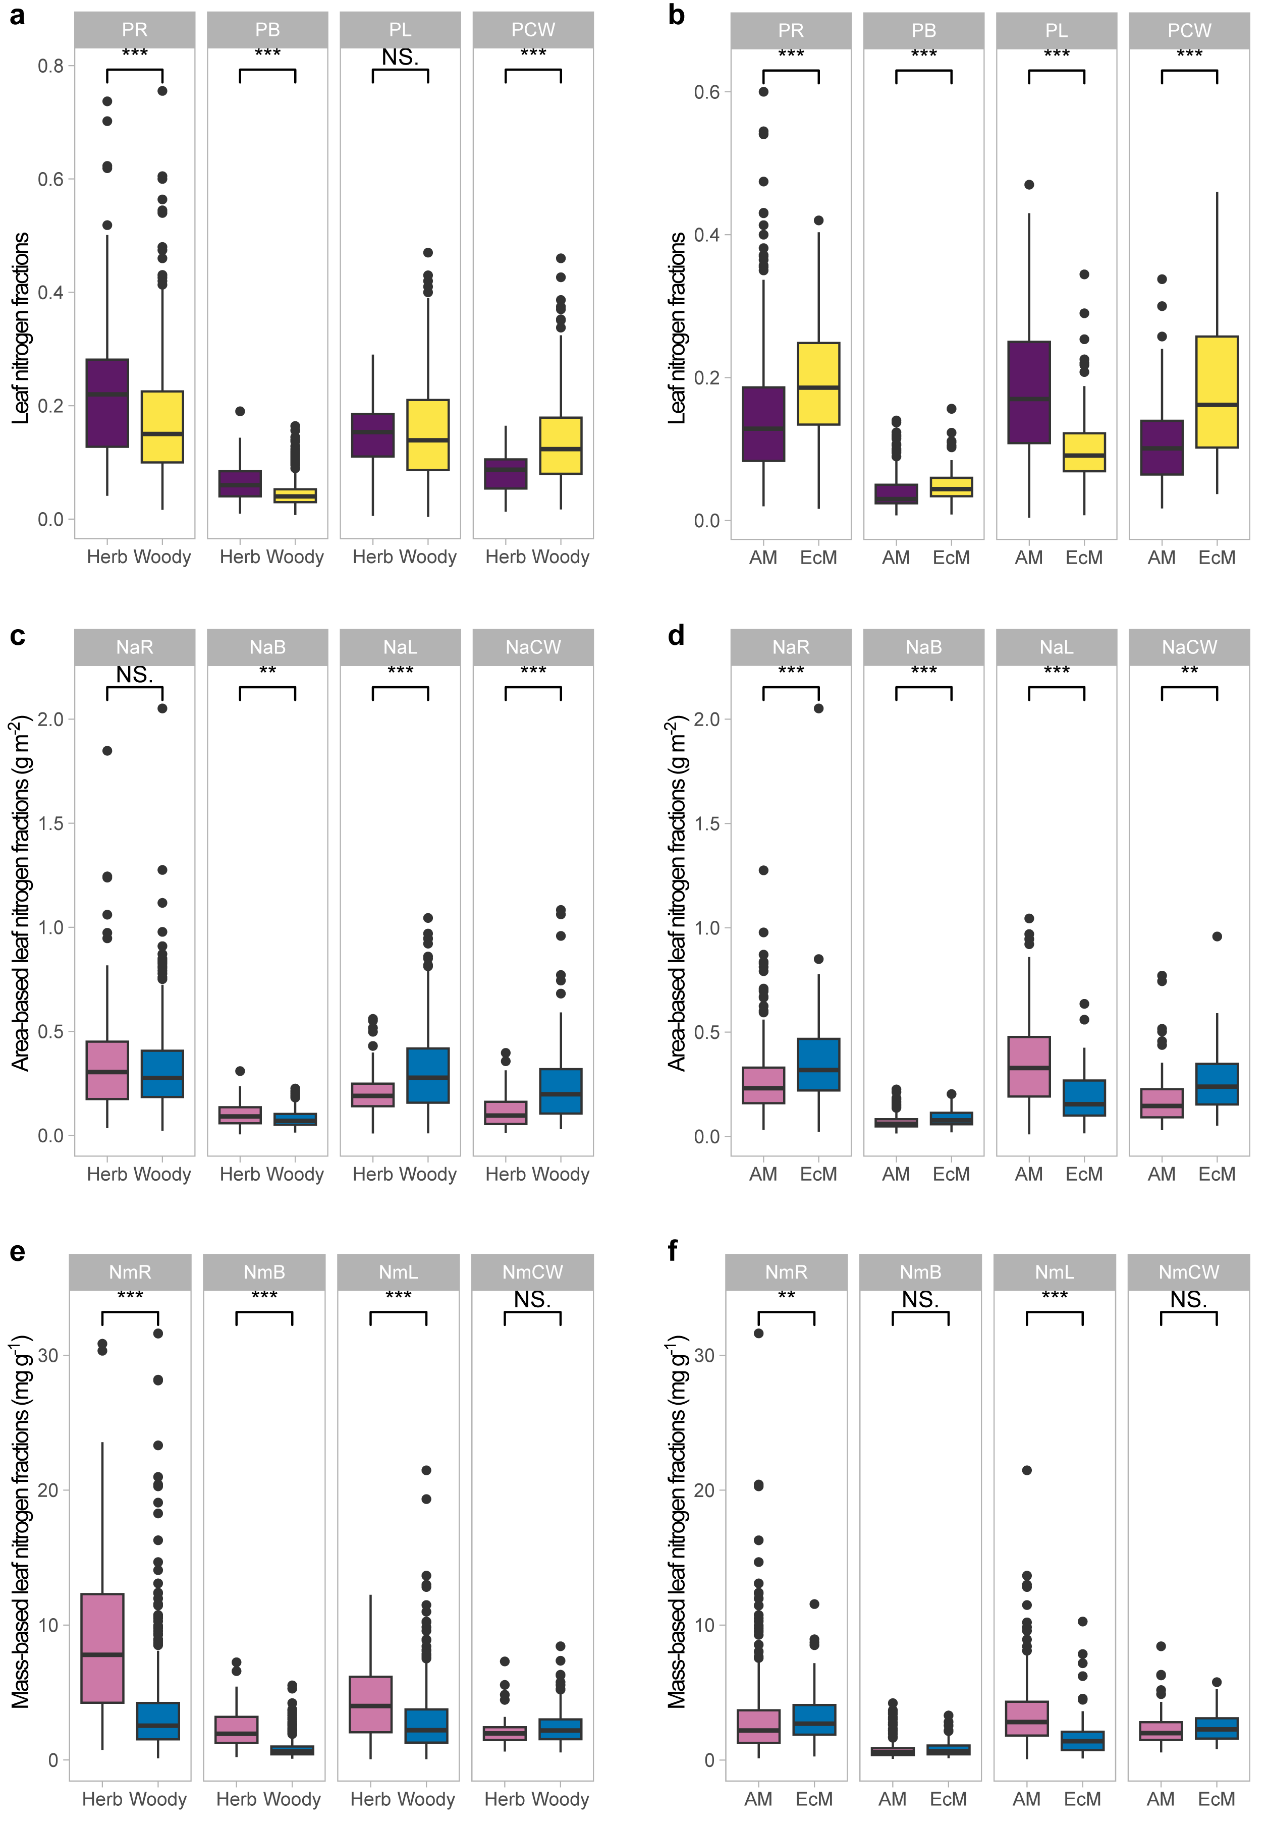


**Supplementary Figure 5.** Comparison of leaf nitrogen allocation patterns between life forms and mycorrhizal types. **P* ≤ 0.05, ***P* ≤ 0.01 and ****P* ≤ 0.001.


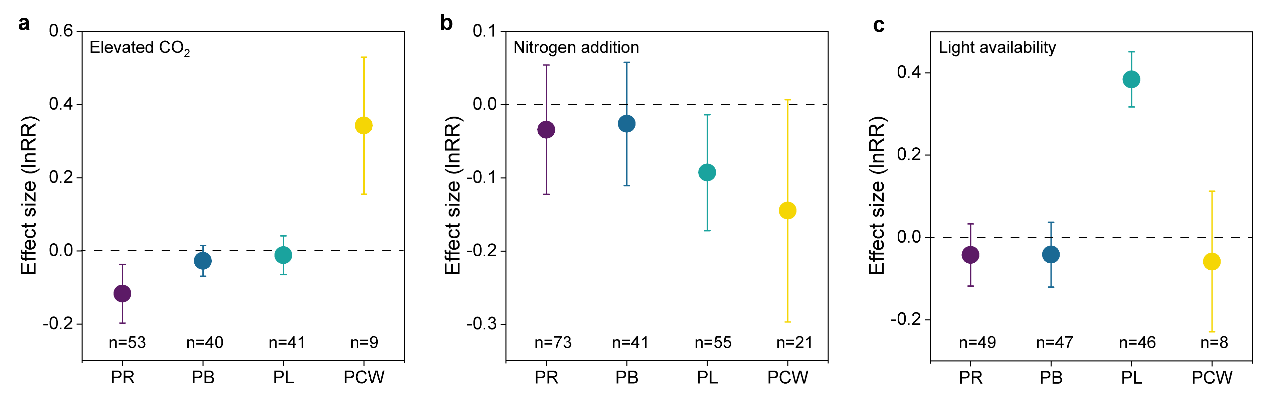


**Supplementary Figure 6.** Response of plant leaf nitrogen allocation to environmental changes. Effect sizes are expressed as log response ratios (lnRR) with 95% confidence intervals (CI). The sample size (number of observations, n) for each treatment group is displayed. Effects were considered significant at α = 0.05 when the confidence interval did not overlap with 0. Light availability treatments refer specifically to reduced light intensity conditions.


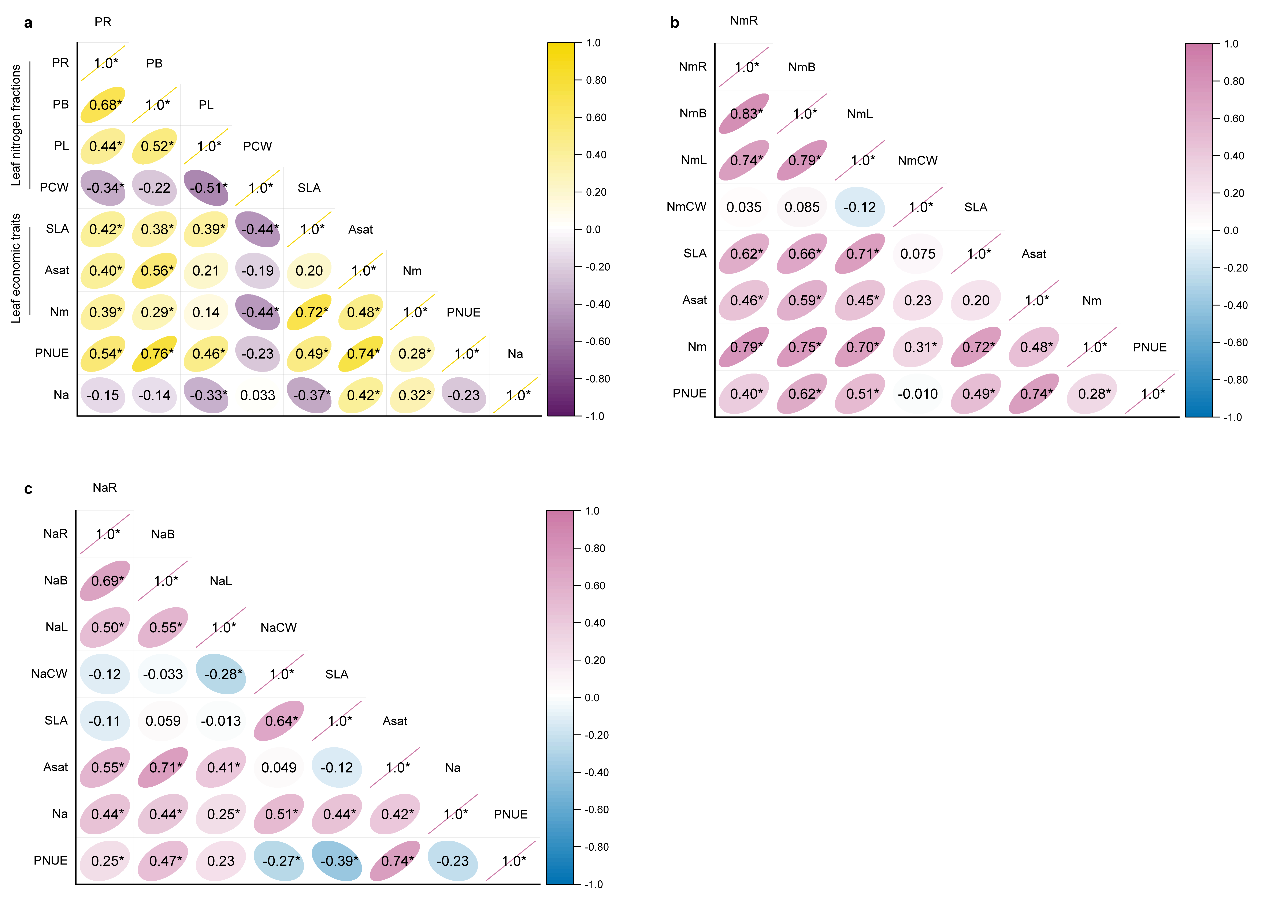


**Supplementary Figure 7.** Correlation matrix between leaf economic traits and leaf nitrogen fractions. The numbers in the graph represent correlation coefficients. **P* < 0.05

**Supplementary Table 1.** Phylogenetic signals of leaf nitrogen fractions. Phylogenetic signal and significance were tested using three methods.

| N fractions | Pagel’s λ | *P* value | Blomberg’s K | *P* value | Moran’s I | *P* value | Species |
| --- | --- | --- | --- | --- | --- | --- | --- |
| PR | 0.864 | **<0.001** | 0.047 | **0.005** | -0.003 | 0.199 | 516 |
| PB | 0.704 | **<0.001** | 0.039 | 0.088 | -0.003 | 0.727 | 396 |
| PL | 0.848 | **<0.001** | 0.109 | **0.001** | -0.005 | 0.001 | 378 |
| PCW | 0.348 | **0.039** | 0.033 | 0.960 | -0.014 | 0.015 | 123 |
| PP | 0.537 | **<0.001** | 0.032 | 0.162 | -0.003 | 0.972 | 313 |

**Supplementary Table 2.** Linear regression of leaf nitrogen fractions with divergence time at the population level.

| Correlations | *R*2 | *P* value |
| --- | --- | --- |
| PR-Time | 0.015 | **<0.01** |
| PB-Time | 0.055 | **<0.001** |
| PL-Time | 0.034 | **<0.001** |
| PCW-Time | 0.04 | **<0.01** |

**Supplementary Table 3.** Coefficients of SMA and Phy.SMA models on relationships between leaf nitrogen fractions.

| Correlations | SMA | | | Phy.SMA | | |
| --- | --- | --- | --- | --- | --- | --- |
| Coefficients | *R*2 | *P* value | Coefficients | *R*2 | *P* value |
| PR-PCW | Slop=-0.629 | 0.067 | **<0.01** | Slop=-0.728 | 0.175 | **<0.001** |
| PB-PCW | Slop=-0.763 | 0.152 | **<0.001** | Slop=-0.814 | 0.147 | **<0.01** |
| PL-PCW | Slop=-1.543 | 0.313 | **<0.001** | Slop=-1.572 | 0.014 | 0.359 |

**Reference**

Ghimire, B., Riley, W. J., Koven, C. D., Kattge, J., Rogers, A., Reich, P. B., & Wright, I. J. (2017). A global trait‐based approach to estimate leaf nitrogen functional allocation from observations. *Ecological Applications*, 27(5), 1421-1434.

Onoda, Y., Hikosaka, K., & Hirose, T. (2004). Allocation of nitrogen to cell walls decreases photosynthetic nitrogen-use efficiency. *Functional Ecology*, 18, 419-425.

Niinemets, Ü., & Tenhunen, J. D. (1997). A model separating leaf structural and physiological effects on carbon gain along light gradients for the shade‐tolerant species *Acer saccharum*. *Plant, Cell & Environment*, 20(7), 845-866.

Xu, C., Fisher, R., Wullschleger, S. D., Wilson, C. J., Cai, M., & McDowell, N. G. (2012). Toward a mechanistic modeling of nitrogen limitation on vegetation dynamics. *PloS One*, 7(5), e37914.

**The literatures list for the database**

[1] Akaji, Y., & Inoue, T. (2023). Effect of soil temperature on the morphological and physiological traits of *Kandelia obovata* seedlings. *Plant Ecology*, 224(6), 579-589.

[2] Bahar, N. H., Ishida, F. Y., Weerasinghe, L. K., Guerrieri, R., O'Sullivan, O. S., Bloomfield, K. J., ... & Atkin, O. K. (2017). Leaf‐level photosynthetic capacity in lowland Amazonian and high‐elevation Andean tropical moist forests of Peru. *New Phytologist*, 214(3), 1002-1018.

[3] Brown, K. R., Thompson, W. A., Camm, E. L., Guy, R. D., & Hawkins, B. J. (1996). Effects of N addition rates on the productivity of *Picea sitchensis*, *Thuja plicata*, and *Tsuga heterophylla* seedlings: II. photosynthesis, 13C discrimination and N partitioning in foliage. *Trees*, 10(3), 198-205.

[4] Byeon, S., Song, W., Park, M., Kim, S., Kim, S., Lee, H., ... & Kim, H. S. (2021). Down-regulation of photosynthesis and its relationship with changes in leaf N allocation and N availability after long-term exposure to elevated CO2 concentration. *Journal of Plant Physiology*, 265, 153489.

[5] Byeon, S., Song, W., Park, M., Kim, S., Kim, S., Lee, H., ... & Kim, H. S. (2022). Canopy height affects the allocation of photosynthetic carbon and nitrogen in two deciduous tree species under elevated CO2. *Journal of Plant Physiology*, 268, 153584.

[6] Cai, Y., Li, S., Li, H., Xie, W., & Li, S. (2010). Photosynthetic characteristics of *Primula denticulata* and *Primula pseudodenticulata*. *Acta Botanica Boreali-Occidentalia Sinica*, 30(2), 362-369.

[7] Cai, Z. Q., Chen, Y. J., & Bongers, F. J. J. M. (2007). Seasonal changes in photosynthesis and growth of *Zizyphus attopensis* seedlings in three contrasting microhabitats in a tropical seasonal rain forest. *Tree Physiology*, 27(6), 827-836.

[8] Chen, J. W., Kuang, S. B., Long, G. Q., Meng, Z. G., Li, L. G., Chen, Z. J., ... & Yang, S. C. (2014). Steady-state and dynamic photosynthetic performance and nitrogen partitioning in the shade-demanding plant *Panax notoginseng* under different levels of growth irradiance. *Acta Physiologiae Plantarum*, 36(9), 2409-2420.

[9] Chen, L., Dong, T., & Duan, B. (2014). Sex-specific carbon and nitrogen partitioning under N deposition in *Populus cathayana*. *Trees*, 28(3), 793-806.

[10] Choi, D., Jang, W., Toda, H., & Yoshikawa, M. (2021). Differences in characteristics of photosynthesis and nitrogen utilization in leaves of the black locust (*Robinia pseudoacacia* L.) according to leaf position. *Forests*, 12(3), 348.

[11] Choi, D., Watanabe, Y., Guy, R. D., Sugai, T., Toda, H., & Koike, T. (2017). Photosynthetic characteristics and nitrogen allocation in the black locust (*Robinia pseudoacacia* L.) grown in a FACE system. *Acta Physiologiae Plantarum*, 39(3), 1-12.

[12] Cooney, L. J., Beechey-Gradwell, Z., Winichayakul, S., Richardson, K. A., Crowther, T., Anderson, P., ... & Roberts, N. J. (2021). Changes in leaf-level nitrogen partitioning and mesophyll conductance deliver increased photosynthesis for *Lolium perenne* leaves engineered to accumulate lipid carbon sinks. *Frontiers in Plant Science*, 12, 641822.

[13] Coste, S., Roggy, J. C., Imbert, P., Born, C., Bonal, D., & Dreyer, E. (2005). Leaf photosynthetic traits of 14 tropical rain forest species in relation to leaf nitrogen concentration and shade tolerance. *Tree physiology*, 25(9), 1127-1137.

[14] Croft, H., Chen, J. M., Luo, X., Bartlett, P., Chen, B., & Staebler, R. M. (2017). Leaf chlorophyll content as a proxy for leaf photosynthetic capacity. *Global Change Biology*, 23(9), 3513-3524.

[15] Cun, Z., Shuang, S. P., Zhang, J. Y., Hong, J., Wu, H. M., Yang, J., ... & Chen, J. W. (2022). Suppression of leaf growth and photosynthetic capacity as an acclimation strategy to nitrogen deficiency in a nitrogen-sensitive and shade-tolerant plant *Panax notoginseng*. *Journal of Plant Interactions*, 17(1), 980-990.

[16] Cun, Z., Wu, H. M., Zhang, J. Y., Shuang, S. P., Hong, J., An, T. X., & Chen, J. W. (2023). High nitrogen inhibits biomass and saponins accumulation in a medicinal plant *Panax notoginseng*. *PeerJ*, 11, e14933.

[17] Cun, Z., Zhang, J., Wu, H., Zhang, L., & Chen, J. (2021). High nitrogen inhibits photosynthetic performance in a shade-tolerant and N-sensitive species *Panax notoginseng*. Photosynthesis Research, 147(3), 283-300.

[18] Dalmolin, Â. C., de Almeida Lobo, F., Vourlitis, G. L., Dalmagro, H. J., Antunes Junior, M. Z., & Rodriguez Ortiz, C. E. (2018). Physiological adjustments of an invasive tree species to extreme hydrological events in a tropical seasonal wetland. *Trees*, 32(5), 1365-1375.

[19] Delagrange, S. (2011). Light- and seasonal-induced plasticity in leaf morphology, N partitioning and photosynthetic capacity of two temperate deciduous species. *Environmental and Experimental Botany*, 70(1), 1-10.

[20] Du, L., Lu, Q., Liang, Z., & Lei, Y. (2019). Changes in photosynthetic characteristics of dominant plants at different primary successional stages on Hailuogou Glacier Foreland, Mt. Gongga, China. *Ecology and Environmental Sciences*, 28(12), 2356-2363.

[21] Dusenge, M. E., Wallin, G., Gårdesten, J., Niyonzima, F., Adolfsson, L., Nsabimana, D., & Uddling, J. (2015). Photosynthetic capacity of tropical montane tree species in relation to leaf nutrients, successional strategy and growth temperature. *Oecologia*, 177, 1183-1194.

[22] Eichelmann, H., Oja, V., Rasulov, B., Padu, E., Bichele, I., Pettai, H., ... & Laisk, A. (2005). Adjustment of leaf photosynthesis to shade in a natural canopy: reallocation of nitrogen. *Plant, Cell & Environment*, 28(3), 389-401.

[23] Evans, J. R., & Poorter, H. (2001). Photosynthetic acclimation of plants to growth irradiance: The relative importance of specific leaf area and nitrogen partitioning in maximizing carbon gain: Photosynthetic acclimation of plants to growth irradiance. *Plant, Cell and Environment*, 24(8), 755-767.

[24] Feng, Q., Cheng, R., Shi, Z., Liu, S., Wang, W., Liu, X., & He, F. (2013). Response of *Rumex dentatus* foliar nitrogen and its allocation to altitudinal gradients along Balang Mountain, Sichuan, China. *Chinese Journal of Plant Ecology*, 37(7), 591-600.

[25] Feng, Y. L. (2008). Photosynthesis, nitrogen allocation and specific leaf area in invasive *Eupatorium adenophorum* and native *Eupatorium japonicum* grown at different irradiances. *Physiologia Plantarum*, 133(2), 318-326.

[26] Feng, Y. L. (2008). Nitrogen allocation and partitioning in invasive and native *Eupatorium* species. *Physiologia Plantarum*, 132(3), 350-358.

[27] Feng, Y., & Fu, G. (2008). Nitrogen allocation, partitioning and use efficiency in three invasive plant species in comparison with their native congeners.*Biological Invasions*, 10(6), 891-902.

[28] Feng, Y., Auge, H., & Ebeling, S. K. (2007). Invasive *Buddleja davidii* allocates more nitrogen to its photosynthetic machinery than five native woody species. *Oecologia*, 153(3), 501-510.

[29] Feng, Y., Fu, G., & Zheng, Y. (2008). Specific leaf area relates to the differences in leaf construction cost, photosynthesis, nitrogen allocation, and use efficiencies between invasive and noninvasive alien congeners. *Planta*, 228(3), 383-390.

[30] Forrester, D. I., Lancaster, K., Collopy, J. J., Warren, C. R., & Tausz, M. (2012). Photosynthetic capacity of eucalyptus globulus is higher when grown in mixture with *Acacia mearnsii*. *Trees*, 26(4), 1203-1213.

[31] Funk, J. L., Glenwinkel, L. A., & Sack, L. (2013). Differential allocation to photosynthetic and non-photosynthetic nitrogen fractions among native and invasive species. *PLoS ONE*, 8(5), e64502.

[32] Gao, L., Su, J., Tian, Q., & Shen, Y. (2020). Contrasting strategies of nitrogen absorption and utilization in alfalfa plants under different water stress. *Journal of Soil Science and Plant Nutrition*, 20(3), 1515-1523.

[33] Ghannoum, O., Evans, J. R., Wah, S. C., Andrews, T. J., Conroy, J. P., & Von Caemmerer, S. (2005). Faster rubisco is the key to superior nitrogen-use efficiency in NADP-malic enzyme relative to NAD-malic enzyme C₄ grasses. *Plant Physiology*, 137(2), 638-650.

[34] Gong, J., Zhang, Z., Wang, B., Shi, J., Zhang, W., Dong, Q., ... & Liu, Y. (2022). N addition rebalances the carbon and nitrogen metabolisms of *Leymus chinensis* through leaf N investment. *Plant Physiology and Biochemistry*, 185, 221-232.

[35] Grassi, G., Colom, M. R., & Minotta, G. (2001). Effects of nutrient supply on photosynthetic acclimation and photoinhibition of one-year-old foliage of *Picea abies*. *Physiologia Plantarum*, 111(2), 245-254.

[36] Grassi, G., Meir, P., Cromer, R., Tompkins, D., & Jarvis, P. G. (2002). Photosynthetic parameters in seedlings of *Eucalyptus grandis* as affected by rate of nitrogen supply. *Plant, Cell & Environment*, 25(12), 1677-1688.

[37] Griffin, K. L., Tissue, D. T., Turnbull, M. H., & Whitehead, D. (2000). The onset of photosynthetic acclimation to elevated CO2 partial pressure in field‐grown *Pinus radiata* D. don. after 4 years. *Plant, Cell and Environment*, 23(10), 1089-1098.

[38] Guan, L., & Wen, D. (2011). More nitrogen partition in structural proteins and decreased photosynthetic nitrogen-use efficiency of *Pinus massoniana* under in situ polluted stress. *Journal of Plant Research*, 124(6), 663-673.

[39] Han, Q., Araki, M., & Chiba, Y. (2006). Acclimation to irradiance of leaf photosynthesis and associated nitrogen reallocation in photosynthetic apparatus in the year following thinning of a young stand of *Chamaecyparis obtusa*. *Photosynthetica*, 44(4), 523-529.

[40] Han, Q., Kawasaki, T., Katahata, S., Mukai, Y., & Chiba, Y. (2003). Horizontal and vertical variations in photosynthetic capacity in a *Pinus densiflora* crown in relation to leaf nitrogen allocation and acclimation to irradiance. *Tree Physiology*, 23(12), 851-857.

[41] Harrison, M. T., Edwards, E. J., Farquhar, G. D., Nicotra, A. B., & Evans, J. R. (2009). Nitrogen in cell walls of sclerophyllous leaves accounts for little of the variation in photosynthetic nitrogen‐use efficiency. *Plant, Cell & Environment*, 32(3), 259-270.

[42] He, L., Kong, J., Li, G., Meng, G., & Chen, K. (2017;2018;). Similar responses in morphology, growth, biomass allocation, and photosynthesis in invasive *Wedelia trilobata* and native congeners to CO2 enrichment. *Plant Ecology*, 219(2), 145-157.

[43] Griffin-Nolan, R. J., Bensaddek, L., Decocq, G., Hikosaka, K., Kichey, T., LeVonne, J., ... & Fridley, J. (2024). Away-range shifts in leaf function of a global invader: a case of resource reallocation?. Biological Invasions, 26(5), 1489-1503.

[44] Hikosaka, K., & Shigeno, A. (2009). The role of rubisco and cell walls in the interspecific variation in photosynthetic capacity. *Oecologia*, 160(3), 443-451.

[45] Hou, W., Tränkner, M., Lu, J., Yan, J., Huang, S., Ren, T., Cong, R., & Li, X. (2019). Interactive effects of nitrogen and potassium on photosynthesis and photosynthetic nitrogen allocation of rice leaves. *BMC Plant Biology*, 19(1), 302-302.

[46] Ji, D. H., Mao, Q., Watanabe, Y., Kitao, M., & Kitaoka, S. (2015). Effect of nitrogen loading on the growth and photosynthetic responses of Japanese larch seedlings grown under different light regimes. *Journal of Agricultural Meteorology*, 71(3), 232-238.

[47] Ji, Q., Li, D., Liu, W., Lai, S., Chen, H., Chen, Q., ... & Yun, X. (2014). Content and allocation of nitrogen in leaves of 8 tree and shrub species of the evergreen broad-leaved forest and the relations with their photosynthetic abilities. *Acta Botanica Boreali-Occidentalia Sinica*, 34(9), 1849-1859.

[48] Kanno, K., Suzuki, Y., & Makino, A. (2017). A small decrease in rubisco content by individual suppression of RBCS genes leads to improvement of photosynthesis and greater biomass production in rice under conditions of elevated CO2. *Plant and Cell Physiology*, 58(3), 635-642.

[49] Katahata, S., Naramoto, M., Kakubari, Y., & Mukai, Y. (2007). Photosynthetic capacity and nitrogen partitioning in foliage of the evergreen shrub *Daphniphyllum humile* along a natural light gradient. *Tree Physiology*, 27(2), 199-208.

[50] Katahata, S., Naramoto, M., Kakubari, Y., & Mukai, Y. (2007). Seasonal changes in photosynthesis and nitrogen allocation in leaves of different ages in evergreen understory shrub *Daphniphyllum humile*.*Trees*, 21(6), 619-629.

[51] Kitaoka, S., & Koike, T. (2004). Invasion of broad-leaf tree species into a larch plantation: Seasonal light environment, photosynthesis and nitrogen allocation. *Physiologia Plantarum*, 121(4), 604-611.

[52] Laitinen, K., Luomala, E., Kellomäki, S., & Vapaavuori, E. (2000). Carbon assimilation and nitrogen in needles of fertilized and unfertilized field-grown scots pine at natural and elevated concentrations of CO2. *Tree Physiology*, 20(13), 881-892.

[53] Le Roux, X., Walcroft, A. S., Daudet, F. A., Sinoquet, H., Chaves, M. M., Rodrigues, A., & Osorio, L. (2001). Photosynthetic light acclimation in peach leaves: Importance of changes in mass: area ratio, nitrogen concentration, and leaf nitrogen partitioning. *Tree Physiology*, 21(6), 377-386.

[54] Lei, Y. B., Feng, Y. L., Zheng, Y. L., Wang, R. F., Gong, H. D., & Zhang, Y. P. (2011). Innate and evolutionarily increased advantages of invasive *Eupatorium adenophorum* over native *E. japonicum* under ambient and doubled atmospheric CO2 concentrations. Biological Invasions, 13(12), 2703-2714.

[55] Lei, Y., Chen, K., Jiang, H., Yu, L., & Duan, B. (2017). Contrasting responses in the growth and energy utilization properties of sympatric *Populus* and *Salix* to different altitudes: Implications for sexual dimorphism in salicaceae. *Physiologia Plantarum*, 159(1), 30-41.

[56] Lei, Y., Du, L., Chen, K., Plenković-Moraj, A., & Sun, G. (2021). Optimizing foliar allocation of limiting nutrients and fast‐slow economic strategies drive forest succession along a glacier retreating chronosequence in the eastern tibetan plateau. *Plant and Soil*, 462(1-2), 159-174.

[57] Lei, Y., Wang, W., Feng, Y., Zheng, Y., & Gong, H. (2012). Synergistic interactions of CO₂ enrichment and nitrogen deposition promote growth and ecophysiological advantages of invading *Eupatorium adenophorum* in Southwest China. *Planta*, 236(4), 1205-1213.

[58] Lei, Z. Y., Wang, H., Wright, I. J., Zhu, X. G., Niinemets, Ü., Li, Z. L., ... & Zhang, Y. L. (2021). Enhanced photosynthetic nitrogen use efficiency and increased nitrogen allocation to photosynthetic machinery under cotton domestication. *Photosynthesis Research*, 150, 239-250.

[59] Li, H., Li, J., Zhang, X., Shi, T., Chai, X., Hou, P., & Wang, Y. (2021). Mesophyll conductance, photoprotective process and optimal N partitioning are essential to the maintenance of photosynthesis at N deficient condition in a wheat yellow-green mutant (*Triticum aestivum* L.). *Journal of Plant Physiology*, 263, 153469.

[60] Li, Z., Zhang, S., Hu, H., & Li, D. (2008). Photosynthetic performance along a light gradient as related to leaf characteristics of a naturally occurring *Cypripedium flavum*.*Journal of Plant Research*, 121(6), 559-569.

[61] Liu, J., Zhang, K., Bi, J., Yu, X., Luo, L., & Hu, L. (2023). Mesophyll conductance and N allocation co-explained the variation in photosynthesis in two canola genotypes under contrasting nitrogen supply. *Frontiers in Plant Science*, 14, 1171331.

[62] Liu, M., Liu, X., Zhao, Y., Korpelainen, H., & Li, C. (2022). Sex-specific nitrogen allocation tradeoffs in the leaves of *Populus cathayana* cuttings under salt and drought stress. *Plant Physiology and Biochemistry*, 172, 101-110.

[63] Liu, N., Wang, J., Guo, Q., Wu, S., Rao, X., Cai, X., & Lin, Z. (2018). Alterations in leaf nitrogen metabolism indicated the structural changes of subtropical forest by canopy addition of nitrogen. *Ecotoxicology and Environmental Safety*, 160, 134-143.

[64] Liu, T., Lu, J. W., Ren, T., Li, X. K., & Cong, R. H. (2016). Relationship between photosynthetic nitrogen use efficiency and nitrogen allocation in photosynthetic apparatus of winter oilseed rape under different nitrogen levels. *Journal of Plant Nutrition and Fertilizers*, 22(2), 518-524.

[65] Luo, G., Li, J., Guo, S., Li, Y., & Jin, Z. (2022). Photosynthesis, Nitrogen Allocation, Non-Structural Carbohydrate Allocation, and C: N: P Stoichiometry of Ulmus elongata Seedlings Exposed to Different Light Intensities. *Life*, 12(9), 1310.

[66] Makino, A., & Osmond, B. (1991). Effects of nitrogen nutrition on nitrogen partitioning between chloroplasts and mitochondria in pea and wheat. *Plant Physiology*, 96(2), 355-362.

[67] Mao, Q. Z., Watanabe, M., Imori, M., Kim, Y. S., Kita, K., & Koike, T. (2012). Photosynthesis and nitrogen allocation in needles in the sun and shade crowns of hybrid larch saplings: Effect of nitrogen application. *Photosynthetica*, 50(3), 422-428.

[68] Marron, N., Brignolas, F., Delmotte, F. M., & Dreyer, E. (2008). Modulation of leaf physiology by age and in response to abiotic constraints in young cuttings of two *Populus deltoides × P. nigra* genotypes. *Annals of Forest Science*, 65(4), 404-404.

[69] Lei, M., Li, S., Zhang, B., & Hu, H. (2009). Effects of Nitrogen on Photosynthesis and Growth in *Incarvillea delavayi* (Bignoniaceae). *Plant Diversity*, 31(1), 82-88.

[70] Moon, M., Kang, K. S., Park, I. K., Kim, T., & Kim, H. S. (2015). Effects of leaf nitrogen allocation on the photosynthetic nitrogen-use efficiency of seedlings of three tropical species in Indonesia. *Journal of the Korean Society for Applied Biological Chemistry*, 58(4), 511-519.

[71] Mu, X., Chen, Q., Chen, F., Yuan, L., & Mi, G. (2016). Within-leaf nitrogen allocation in adaptation to low nitrogen supply in maize during grain-filling stage. *Frontiers in Plant Science*, 7, 699.

[72] Nagano, S., Nakano, T., Hikosaka, K., & Maruta, E. (2009). Needle traits of an evergreen, coniferous shrub growing at wind‐exposed and protected sites in a mountain region: does *Pinus pumila* produce needles with greater mass per area under wind‐stress conditions?. *Plant Biology*, 11, 94-100.

[73] Niinemets, Ü. L. O., Cescatti, A., Rodeghiero, M., & Tosens, T. (2005). Leaf internal diffusion conductance limits photosynthesis more strongly in older leaves of Mediterranean evergreen broad-leaved species. *Plant, Cell & Environment*, 28(12), 1552-1566.

[74] Niinemets, Ü., Cescatti, A., Rodeghiero, M., & Tosens, T. (2006). Complex adjustments of photosynthetic potentials and internal diffusion conductance to current and previous light availabilities and leaf age in Mediterranean evergreen species *Quercus ilex*. *Plant, Cell & Environment*, 29(6), 1159-1178.

[75] Niinemets, Ü., Tenhunen, J. D., Canta, N. R., Chaves, M. M., Faria, T., Pereira, J. S., & Reynolds, J. F. (1999). Interactive effects of nitrogen and phosphorus on the acclimation potential of foliage photosynthetic properties of cork oak, Quercus suber, to elevated atmospheric CO2 concentrations. *Global Change Biology*, 5(4), 455-470.

[76] Noda, H. M., Muraoka, H., Nasahara, K. N., Saigusa, N., Murayama, S., & Koizumi, H. (2015). Phenology of leaf morphological, photosynthetic, and nitrogen use characteristics of canopy trees in a cool-temperate deciduous broadleaf forest at Takayama, central Japan. *Ecological Research*, 30, 247-266.

[77] Novriyanti, E., Watanabe, M., Makoto, K., Takeda, T., Hashidoko, Y., & Koike, T. (2012). Photosynthetic nitrogen and water use efficiency of acacia and eucalypt seedlings as afforestation species. *Photosynthetica*, 50(2), 273-281.

[78] Onoda, Y., Hikosaka, K., & Hirose, T. (2004). Allocation of nitrogen to cell walls decreases photosynthetic nitrogen-use efficiency. *Functional Ecology*, 18(3), 419-425.

[79] Osaki, M., Shinano, T., & Tadano, T. (1993). Effect of nitrogen, phosphorus, or potassium deficiency on the accumulation of ribulose-1, 5-bisphosphate carboxylase/oxygenase and chlorophyll in several field crops. *Soil Science and Plant Nutrition*, 39(3), 417-425.

[80] Parelle, J., Roudaut, J., & Ducrey, M. (2006). Light acclimation and photosynthetic response of beech (*Fagus sylvatica* L.) saplings under artificial shading or natural mediterranean conditions. *Annals of Forest Science*, 63(3), 257-266.

[81] Park, M., Cho, S., Park, J., Lee, H., Song, W., Park, I., & Kim, H. S. (2019). Size-dependent variation in leaf functional traits and nitrogen allocation trade-offs in *Robinia pseudoacacia* and *Cornus controversa*. *Tree Physiology*, 39(5), 755-766.

[82] Posch, S., Warren, C. R., Kruse, J., Guttenberger, H., & Adams, M. A. (2008). Nitrogen allocation and the fate of absorbed light in 21-year-old *Pinus radiata*. *Tree Physiology*, 28(3), 375-384.

[83] Qing, H., Cai, Y., Xiao, Y., Yao, Y., & An, S. (2012). Leaf nitrogen partition between photosynthesis and structural defense in invasive and native tall form *Spartina alterniflora* populations: effects of nitrogen treatments. *Biological Invasions*, 14(10), 2039-2048.

[84] Ripullone, F., Grassi, G., Lauteri, M., & Borghetti, M. (2003). Photosynthesis-nitrogen relationships: interpretation of different patterns between *Pseudotsuga menziesii* and *Populus × euroamericana* in a mini-stand experiment. *Tree Physiology*, 23(2), 137-144.

[85] Robakowski, P., Montpied, P., & Dreyer, E. (2003). Plasticity of morphological and physiological traits in response to different levels of irradiance in seedlings of silver fir (*Abies alba* Mill). *Trees*, 17(5), 431-441.

[86] Rogers, A., Serbin, S. P., Ely, K. S., Sloan, V. L., & Wullschleger, S. D. (2017). Terrestrial biosphere models underestimate photosynthetic capacity and CO2 assimilation in the Arctic. *New Phytologist*, 216(4), 1090-1103.

[87] Rogers, G. S., Milham, P. J., Gillings, M., & Conroy, J. P. (1996). Sink strength may be the key to growth and nitrogen responses in N-deficient wheat at elevated CO2. *Australian Journal of Plant Physiology*, 23(3), 253-264.

[88] Sage, R. F., Sharkey, T. D., & Seemann, J. R. (1989). Acclimation of photosynthesis to elevated CO2 in five C3 species. *Plant Physiology*, 89(2), 590-596.

[89] Scartazza, A., Di Baccio, D., Mariotti, L., Bettarini, I., Selvi, F., Pazzagli, L., ... & Gonnelli, C. (2022). Photosynthesizing while hyperaccumulating nickel: Insights from the genus *Odontarrhena* (Brassicaceae). *Plant Physiology and Biochemistry*, 176, 9-20.

[90] Shang, B., Fu, R., Agathokleous, E., Dai, L., Zhang, G., Wu, R., & Feng, Z. (2022). Ethylenediurea offers moderate protection against ozone-induced rice yield loss under high ozone pollution. *Science of The Total Environment*, 806, 151341.

[91] Shang, B., Xu, Y., Dai, L., Yuan, X., & Feng, Z. (2019). Elevated ozone reduced leaf nitrogen allocation to photosynthesis in poplar. *Science of the Total Environment*, 657, 169-178.

[92] Sharwood, R. E., Crous, K. Y., Whitney, S. M., Ellsworth, D. S., & Ghannoum, O. (2017). Linking photosynthesis and leaf N allocation under future elevated CO2 and climate warming in *Eucalyptus globulus*. *Journal of Experimental Botany*, 68(5), 1157-1167.

[93] Song, G., & Wang, Q. (2023). Seasonal dynamics of photosynthetic nitrogen content and partitioning in deciduous forests. *Photosynthesis Research*, 156(3), 355-366.

[94] Sun, G., Zeng, X., & Zhao, P. (2003). Comparison of photosynthetic parameters in leaves of *Citrus grandis* grown under different forms of nitrogen source during photosynthetic acclimation to elevated CO2. *Acta Ecologica Sinica*, 23(1), 14-21.

[95] Sun, G., Zhao, P., Zeng, X., & Peng, S. (2002). Changes of Leaf Photosynthetic Parameters in Leaves of *Woonyoungia septentrionaLis* and *Tsoongiodendron lotungensis* Under Different Growth-Irradiation. *Chinese Journal of Plant Ecology*, 26(3), 355.

[96] Sun, Y. R., Ma, W. T., Xu, Y. N., Wang, X., Li, L., Tcherkez, G., & Gong, X. Y. (2023). Short-and long-term responses of leaf day respiration to elevated atmospheric CO2. *Plant Physiology*, 191(4), 2204-2217.

[97] Suzuki, Y., Ohkubo, M., Hatakeyama, H., Ohashi, K., Yoshizawa, R., Kojima, S., ... & Makino, A. (2007). Increased Rubisco content in transgenic rice [*Oryza sativa*] transformed with the'Sense'rbcS gene. *Plant and Cell Physiology*, 48(4), 626-637.

[98] Suzuki, Y., KIHARA‐DOI, T., Kawazu, T., Miyake, C., & Makino, A. (2010). Differences in Rubisco content and its synthesis in leaves at different positions in *Eucalyptus globulus* seedlings. *Plant, cell & environment*, 33(8), 1314-1323.

[99] Takashima, T., Hikosaka, K., & Hirose, T. (2004). Photosynthesis or persistence: nitrogen allocation in leaves of evergreen and deciduous Quercus species. *Plant, Cell & Environment*, 27(8), 1047-1054.

[100] Tang, J., Cheng, R., Shi, Z., Xu, G., Liu, S., & Centritto, M. (2018). Fagaceae tree species allocate higher fraction of nitrogen to photosynthetic apparatus than Leguminosae in Jianfengling tropical montane rain forest, China. *PLoS ONE*, 13(2), e0192040.

[101] Tang, J., Sun, B., Cheng, R., Shi, Z., Luo, D., Liu, S., & Centritto, M. (2019). Effects of soil nitrogen (N) deficiency on photosynthetic N-use efficiency in N-fixing and non-N-fixing tree seedlings in subtropical China. *Scientific Reports*, 9(1), 4604.

[102] Tang, J., Sun, B., Cheng, R., Shi, Z., Luo, D., Liu, S., & Centritto, M. (2021). The effect of low irradiance on leaf nitrogen allocation and mesophyll conductance to CO2 in seedlings of four tree species in subtropical China. *Plants*, 10(10), 2213.

[103] Tazoe, Y., Noguchi, K. O., & Terashima, I. (2006). Effects of growth light and nitrogen nutrition on the organization of the photosynthetic apparatus in leaves of a C4 plant, *Amaranthus cruentus*. *Plant, Cell & Environment*, 29(4), 691-700.

[104] Yang, T., Xu, K., Yan, N., Li, S., & Hu, H. (2013). Photosynthetic Ecophysiology of Three Species of Genus *Rhododendron*. *Plant Diversity*, 35(1), 17-25.

[105] Tissue, D. T., Thomas, R. B., & Strain, B. R. (1993). Long‐term effects of elevated CO2 and nutrients on photosynthesis and rubisco in loblolly pine seedlings. *Plant, Cell & Environment*, 16(7), 859-865.

[106] Tobita, H., Kitao, M., Uemura, A., & Utsugi, H. (2021). Species-specific nitrogen resorption efficiency in *Quercus mongolica* and *Acer mono* in response to elevated CO2 and soil N deficiency. *Forests*, 12(8), 1034.

[107] Trouwborst, G., Hogewoning, S. W., Harbinson, J., & van Ieperen, W. (2011). Photosynthetic acclimation in relation to nitrogen allocation in cucumber leaves in response to changes in irradiance. *Physiologia Plantarum*, 142(2), 157-169.

[108] Turnbull, T. L., Kelly, N., Adams, M. A., & Warren, C. R. (2007). Within-canopy nitrogen and photosynthetic gradients are unaffected by soil fertility in field-grown *Eucalyptus globulus*. *Tree Physiology*, 27(11), 1607-1617.

[109] van de Weg, M. J., Shaver, G. R., & Salmon, V. G. (2013). Contrasting effects of long term versus short-term nitrogen addition on photosynthesis and respiration in the Arctic. *Plant Ecology*, 214, 1273-1286.

[110] Walcroft, A., Le Roux, X., Diaz-Espejo, A., Dones, N., & Sinoquet, H. (2002). Effects of crown development on leaf irradiance, leaf morphology and photosynthetic capacity in a peach tree. *Tree Physiology*, 22(13), 929-938.

[111] Wang, J., Ouyang, F., An, S., Wang, L., Xu, N., Ma, J., ... & Kong, L. (2022). Variation, coordination, and trade-offs between needle structures and photosynthetic-related traits across five Picea species: consequences on plant growth. *BMC Plant Biology*, 22(1), 1-16.

[112] Wang, S., Li, Y., Ju, W., Chen, B., Chen, J., Croft, H., ... & Yang, F. (2020). Estimation of leaf photosynthetic capacity from leaf chlorophyll content and leaf age in a subtropical evergreen coniferous plantation.*Journal of Geophysical Research: Biogeosciences*, 125(2), e2019JG005020.

[113] Wang, W., Wang, R., Lei, Y., Liu, C., Han, L., Shi, X., & Feng, Y. (2013). High resource capture and use efficiency and prolonged growth season contribute to invasiveness of *Eupatorium adenophorum*. *Plant Ecology*, 214(6), 857-868.

[114] Waring, E. F., Perkowski, E. A., & Smith, N. G. (2023). Soil nitrogen fertilization reduces relative leaf nitrogen allocation to photosynthesis. *Journal of Experimental Botany*, 74(17), 5166-5180.

[115] Warren, C. (2004). The photosynthetic limitation posed by internal conductance to CO2 movement is increased by nutrient supply. *Journal of Experimental Botany*, 55(406), 2313-2321.

[116] Warren, C. R., & Adams, M. A. (2001). Distribution of N, rubisco and photosynthesis in *Pinus pinaster* and acclimation to light. *Plant, Cell and Environment*, 24(6), 597-609.

[117] Warren, C. R., & Adams, M. A. (2004). What determines rates of photosynthesis per unit nitrogen in *Eucalyptus* seedlings?. *Functional Plant Biology*, 31(12), 1169-1178.

[118] Warren, C. R., Adams, M. A., & Chen, Z. (2000). Is photosynthesis related to concentrations of nitrogen and Rubisco in leaves of Australian native plants? *Australian Journal of Plant Physiology*, 27(5), 407-416.

[119] Warren, C. R., Chen, Z., & Adams, M. A. (2000). Effect of N source on concentration of rubisco in *Eucalyptus diversicolor*, as measured by capillary electrophoresis. *Physiologia Plantarum*, 110(1), 52-58.

[120] Warren, C. R., Dreyer, E., & Adams, M. A. (2003). Photosynthesis-rubisco relationships in foliage of *Pinus sylvestris* in response to nitrogen supply and the proposed role of rubisco and amino acids as nitrogen stores. *Trees*, 17(4), 359-366.

[121] Warren, C. R., Dreyer, E., Tausz, M., & Adams, M. A. (2006). Ecotype adaptation and acclimation of leaf traits to rainfall in 29 species of 16‐year‐old *Eucalyptus* at two common gardens. *Functional Ecology*, 20(6), 929-940.

[122] Warren, C. R., Ethier, G. J., Livingston, N. J., Grant, N. J., Turpin, D. H., Harrison, D. L., & Black, T. A. (2003). Transfer conductance in second growth Douglas-fir (*Pseudotsuga menziesii* (Mirb.) Franco) canopies. *Plant, Cell & Environment*, 26(8), 1215-1227.

[123] Wei, X., Yang, Y., Yao, J., Han, J., Yan, M., Zhang, J., ... & Mu, C. (2022). Improved utilization of nitrate nitrogen through within-leaf nitrogen allocation trade-offs in *Leymus chinensis*. *Frontiers in Plant Science*, 13, 870681.

[124] Westbeek, M. H. M., Pons, T. L., Cambridge, M. L., & Atkin, O. K. (1999). Analysis of differences in photosynthetic nitrogen use efficiency of alpine and lowland *Poa* species. *Oecologia*, 120(1), 19-26.

[125] Wilson, K. B., Baldocchi, D. D., & Hanson, P. J. (2000). Spatial and seasonal variability of photosynthetic parameters and their relationship to leaf nitrogen in a deciduous forest. *Tree Physiology*, 20(9), 565-578.

[126] Wu, F., Zhang, H., Fang, F., Liu, H., & Tang, M. (2017). Arbuscular mycorrhizal fungi alter nitrogen allocation in the leaves of Populus × canadensis ‘Neva’. Plant and Soil, 421, 477-491.

[127] Wu, J. M., Tang, J. C., Shi, Z. M., Feng, Q. H., Zhao, G. D., Liu, S., & Cao, X. W. (2019). Response of photosynthetic nitrogen use efficiency in *Betula utilis* to altitudinal variation along Balang Mountain, Sichuan, China. *Chinese Journal of Applied Ecology*, 30(3), 751-758.

[128] Wu, J., Shi, Z., Liu, S., Centritto, M., Cao, X., Zhang, M., & Zhao, G. (2021). Photosynthetic capacity of male and female *Hippophae rhamnoides* plants along an elevation gradient in eastern Qinghai-Tibetan Plateau, China. *Tree Physiology*, 41(1), 76-88.

[129] Wu, Y., Ma, L., Zhang, L., Zhang, Y., Zhou, H., Wang, Y., & Liu, Y. (2022). Photosynthetic carbon and nitrogen metabolism of *Camellia oleifera* Abel during acclimation to low light conditions. *Journal of Plant Physiology*, 278, 153814.

[130] Xiao, Y., Liu, S., Zhang, M., Tong, F., Xu, Z., Ford, R., ... & Luo, T. (2021). Plant functional groups dominate responses of plant adaptive strategies to urbanization. *Frontiers in Plant Science*, 12, 773676.

[131] Xu, Q., He, H., He, B., Li, T., Liu, Y., Zhu, S., & Zhang, G. (2022). Nitrogen Allocation Tradeoffs Within-Leaf between Photosynthesis and High-Temperature Adaptation among Different Varieties of Pecan (*Carya illinoinensis* [Wangenh.] K. Koch). *Plants*, 11(21), 2828.

[132] Yang, K., Huang, Y., Yang, J., Yu, L., Hu, Z., Sun, W., & Zhang, Q. (2023). The determiner of photosynthetic acclimation induced by biochemical limitation under elevated CO2 in japonica rice. *Journal of Plant Physiology*, 280, 153889.

[133] Yao, H., Zhang, Y., Yi, X., Hu, Y., Luo, H., Gou, L., & Zhang, W. (2015). Plant density alters nitrogen partitioning among photosynthetic components, leaf photosynthetic capacity and photosynthetic nitrogen use efficiency in field-grown cotton. *Field Crops Research*, 184, 39-49.

[134] Yao, H., Zhang, Y., Yi, X., Zhang, X., Fan, D., Chow, W. S., & Zhang, W. (2018). Diaheliotropic leaf movement enhances leaf photosynthetic capacity and photosynthetic light and nitrogen use efficiency via optimising nitrogen partitioning among photosynthetic components in cotton (*Gossypium hirsutum* L.). *Plant Biology*, 20(2), 213-222.

[135] Yasumura, Y., Hikosaka, K., & Hirose, T. (2006). Seasonal changes in photosynthesis, nitrogen content and nitrogen partitioning in *Lindera umbellata* leaves grown in high or low irradiance. *Tree Physiology*, 26(10), 1315-1323.

[136] Ye, X., Bu, W., Hu, X., Liu, B., Liang, K., & Chen, F. (2023). Species divergence in seedling leaf traits and tree growth response to nitrogen and phosphorus additions in an evergreen broadleaved forest of subtropical China. *Journal of Forestry Research*, 34(1), 137-150.

[137] Yin, L., Xu, H., Dong, S., Chu, J., Dai, X., & He, M. (2019). Optimised nitrogen allocation favours improvement in canopy photosynthetic nitrogen-use efficiency: evidence from late-sown winter wheat. *Environmental and Experimental Botany*, 159, 75-86.

[138] Zhang, J., Zhang, J., Zhang, J., Cun, Z., Cun, Z., Cun, Z., Chen, J., Chen, J., & Chen, J. (2020). Photosynthetic performance and photosynthesis-related gene expression coordinated in a shade-tolerant species *Panax notoginseng* under nitrogen regimes. *BMC Plant Biology*, 20(1), 273-273.

[139] Zhang, L., Chen, X., & Wen, D. (2016). Interactive effects of rising CO2 and elevated nitrogen and phosphorus on nitrogen allocation in invasive weeds *Mikania micrantha* and *Chromolaena odorata*. *Biological Invasions*, 18(5), 1391-1407.

[140] Zhang, X., Hu, H., Li, F., Huang, L., & Bao, W. (2023). Within leaf nitrogen allocation regulates the photosynthetic behavior of xerophytes in response to increased soil rock fragment content. *Plant Physiology and Biochemistry*, 200, 107753.

[141] Zhang, Y. J., & Feng, Y. L. (2004). The relationships between photosynthetic capacity and lamina mass per unit area, nitrogen content and partitioning in seedlings of two *Ficus* species grown under different irradiance. *Journal of Plant Physiology and Molecular Biology*, 30(3), 269-276.

[142] Zhao, P., Sun, G. C., Zeng, X. P., Cai, X. A., & Peng, S. L. (2003). Variations of photosynthetic parameters in leaves of *Acacia auriculaeformis* grown in different nitrogen sources under increased atmospheric NH3. *Acta Ecologica Sinica*, 23(7), 1386-1394.

[143] Zheng, S. X., & Shangguan, Z. P. (2007). Photosynthetic characteristics and their relationships with leaf nitrogen content and leaf mass per area in different plant functional types. *Acta Ecologica Sinica*, 27(1), 171-181.

[144] Zheng, Y., Feng, Y., Lei, Y., & Liao, Z. (2012). Comparisons of plastic responses to irradiance and physiological traits by invasive *Eupatorium adenophorum* and its native congeners. *Journal of Plant Physiology*, 169(9), 884-891.

[145] Zhong, C., Jian, S., Huang, J., Jin, Q., & Cao, X. (2019). Trade-off of within-leaf nitrogen allocation between photosynthetic nitrogen-use efficiency and water deficit stress acclimation in rice (*Oryza sativa* L.). *Plant Physiology and Biochemistry*, 135, 41-50.

[146] Zhu, J. T., Li, X. Y., Zhang, X. M., Yu, Q., & Lin, L. S. (2012). Leaf nitrogen allocation and partitioning in three groundwater-dependent herbaceous species in a hyper-arid desert region of north-western China. *Australian Journal of Botany*, 60(1), 61-67.

[147] Zhuang, J., Zhou, L., Wang, Y., & Chi, Y. (2021). Nitrogen allocation regulates the relationship between maximum carboxylation rate and chlorophyll content along the vertical gradient of subtropical forest canopy. *Agricultural and Forest Meteorology*, 307, 108512.

[148] Ziegler, C., Dusenge, M. E., Nyirambangutse, B., Zibera, E., Wallin, G., & Uddling, J. (2020). Contrasting dependencies of photosynthetic capacity on leaf nitrogen in early-and late-successional tropical montane tree species. *Frontiers in Plant Science*, 11, 500479.

[149] Song, Y., Liao, L., Liu, T., Jiang, Y. F., Yu, W. W., Hu, Y. Y., & Wu, J. S. (2016). Response of photosynthesis and nitrogen distribution of Torreya grandis ‘Merrilli’seedlings in different light regimes. Sci Silvae Sin, 52, 55-63.

[150] Sun, G., Zhao, P., Zeng, X., & Peng, S. (2000). Effects of Supplementary UV2B Radiation on Photosynthesis and Partition of Leaf Nitrogen in Components of Photosynthetic Carbon Cycle in Leaves of Musa paradisiaca. Chinese Bulletin of Botany, 17(5), 450-456.

[151] Zhao, H. X., Zhang, Y. J., Xu, M. Z., Wei, T. Z., Mao, J., Luo, Y., ... & Zha, T. S. (2022). Effects of leaf nitrogen allocation on seasonal variation in maximum net photosynthetic rate in Artemisia ordosica. Acta Ecologica Sinica, 42, 7156-7166.

[152] Zhu, J., Li, X., Zhang, X., Lin, L., & Yang, S. (2010). Nitrogen allocation and partitioning within a leguminous and two non-leguminous plant species growing at the southern fringe of China’s Taklamakan Desert. Chinese Journal of Plant Ecology, 34(9), 1025-1032.

[153] Hu, W., Zhang, S., Huang, W., Chang, H., Li, Y., Gu, C., ... & Qin, L. (2025). Nitrogen-driven changes in leaf anatomy affect the coupling between leaf mass per area and photosynthesis. Journal of Experimental Botany, eraf108.

[154] Ren, W., Li, X., Liu, T., Chen, N., Xin, M., Qi, Q., & Liu, B. (2025). Controlled-release fertilizer affects leaf nitrogen allocation and photosynthesis to improve nitrogen use efficiency and yield in the sunflower field. Frontiers in Plant Science, 16, 1622766.

[155] Hu, W., Zhao, M., Zhang, S., Li, Y., Dai, J., Gu, C., ... & Liao, X. (2023). Optimized leaf storage and photosynthetic nitrogen trade‐off promote synergistic increases in photosynthetic rate and photosynthetic nitrogen use efficiency. Physiologia Plantarum, 175(5), e14013.

[156] Zhang, G., Li, Z., Zhu, Q., Yang, C., Shu, H., Gao, Z., ... & Liu, R. (2025). Cropping patterns and plant population density alter nitrogen partitioning among photosynthetic components, leaf photosynthetic capacity and photosynthetic nitrogen use efficiency in field-grown soybean. Industrial Crops and Products, 226, 120680.

[157] Kang, Y., Wu, Q., Pan, G., Yang, H., Li, J., Yang, X., & Zhong, M. (2024). High daily light integral positively regulate photosynthetic capacity through mediating nitrogen partitioning and leaf anatomical characteristic in flowering Chinese cabbage. Scientia Horticulturae, 326, 112715.
