# Supplementary material
Source: Research Square preprint supplement (doi:10.21203/rs.3.rs-7211523/v1)
Supplement: Supplementary file 2 [file bee66fb181dbac00948eca2b.xlsx]

## Sheet: Figure 1
Figure 1
Species	Family	PR_mean	PB_mean	PL_mean	PCW_mean
Abies alba	Pinaceae	0.11435	0.0248889	0.069808
Abies fabri	Pinaceae	0.239295	0.0420513		0.152586
Abies firma	Pinaceae	0.245			0.324
Acacia auriculiformis	Fabaceae	0.150917	0.0216167	0.158667
Acacia beckleri	Fabaceae	0.0424544			0.123388
Acacia implexa	Fabaceae	0.0684933			0.209371
Acacia koa	Fabaceae	0.54047	0.0631605	0.112621	0.045742
Acacia mangium	Fabaceae	0.178236	0.024309
Acacia mearnsii	Fabaceae	0.0645	0.0280944	0.0313497
Acer japonicum	Sapindaceae	0.138			0.064
Acer mono	Sapindaceae	0.2655	0.07		0.032
Acer nikoense	Sapindaceae	0.229			0.056
Acer rubrum	Sapindaceae	0.269381	0.0785022	0.163276
Acer saccharum	Sapindaceae	0.248687	0.049225
Alchornea anamariae	Euphorbiaceae	0.105	0.035	0.24
Alchornea triplinervia	Euphorbiaceae	0.11	0.03	0.09
Alhagi sparsifolia	Fabaceae	0.07	0.03	0.285
Alpinia chinensis	Zingiberaceae	0.181766	0.022921	0.108785	0.0961865
Amanoa guianensis	Euphorbiaceae	0.288571	0.0582222
Amaranthus cruentus	Amaranthaceae	0.0953333
Aniba perutilis	Lauraceae	0.08	0.03	0.24
Apeiba aspera	Malvaceae	0.2	0.03
Aptandra liriosmoides	Olacaceae	0.04		0.29
Arctagrostis latifolia	Poaceae	0.247024	0.143526
Arctophila fulva	Poaceae	0.335714	0.190124
Ardisia quinquegona	Primulaceae	0.156902	0.0307311	0.0929516	0.114717
Artemisia ordosica	Asteraceae	0.2	0.06	0.04
Artemisia vestita	Asteraceae	0.0847465	0.0260864	0.0138596	0.33774
Aspidosperma desmanthum	Apocynaceae	0.09	0.03	0.175
Aspidosperma excelsum	Apocynaceae	0.07		0.25
Astragalus adsurgens	Fabaceae	0.229598			0.123851
Astragalus membranaceus	Fabaceae	0.338291	0.0529573
Astrebla lappacea	Poaceae	0.106		0.181783
Astrebla pectinata	Poaceae	0.041		0.110847
Bagassa guianensis	Moraceae	0.214286	0.0550556
Banksia aemula	Proteaceae	0.117		0.19
Banksia blechnifolia	Proteaceae	0.0904105			0.281484
Banksia serrata	Proteaceae	0.141601			0.180768
Begonia grandis	Begoniaceae	0.0775		0.14
Beilschmiedia latifolia	Lauraceae	0.11	0.04	0.34
Berberis vulgaris	Berberidaceae	0.22	0.055	0.049
Bertholletia excelsa	Lecythidaceae	0.16	0.03
Betula alleghaniensis	Betulaceae	0.237316	0.0461025
Betula alnoides	Betulaceae	0.281	0.0713333	0.1285	0.204667
Betula ermanii	Betulaceae	0.162179	0.0428384	0.126633
Betula nana	Betulaceae	0.196497	0.0528187	0.0844849
Betula pendula	Betulaceae	0.358119	0.0897519	0.128181
Betula utilis	Betulaceae	0.284662	0.04	0.00925	0.238787
Bixa arborea	Bixaceae	0.14	0.04
Blastus cochinchinensis	Melastomataceae	0.143333	0.0633333	0.0683333	0.0783333
Bothriochloa biloba	Poaceae	0.045		0.249673
Bothriochloa bladhii	Poaceae	0.053		0.241828
Brassica campestris	Brassicaceae	0.2645	0.0334	0.1895	0.1088
Brassica napus	Brassicaceae	0.280666	0.079805	0.172398	0.114634
Brassica oleracea	Brassicaceae	0.158	0.091706	0.1079
Brosimum potabile	Moraceae	0.04		0.12
Brosimum rubescens	Moraceae	0.09	0.025	0.17
Brosimum utile	Moraceae	0.11	0.03	0.16
Brunellia stenoptera	Brunelliaceae		0.06	0.17
Buchenavia tomentosa	Combretaceae	0.06	0.02	0.19
Buddleja davidii	Scrophulariaceae	0.6	0.095	0.036
Cabralea canjerana	Meliaceae	0.07	0.03	0.2
Calyptranthes bipennis	Myrtaceae	0.07	0.02	0.29
Camellia fraterna	Theaceae	0.1456			0.06299
Camellia japonica	Theaceae	0.196			0.098
Camellia oleifera	Theaceae	0.200667	0.0506667	0.231	0.0673333
Caraipa punctulata	Clusiaceae	0.1	0.03	0.17
Caraipa tereticaulis	Clusiaceae	0.12		0.19
Carapa grandiflora	Meliaceae	0.119997	0.0276583	0.187536
Carapa procera	Meliaceae	0.289524	0.0486111
Carex aquatilis	Cyperaceae	0.164683	0.095218
Carpinus cordata	Betulaceae	0.184667	0.111	0.253667
Carya illinoinensis	Juglandaceae	0.226959	0.0190669	0.0821364
Castanea henryi	Fagaceae	0.13	0.0533333	0.055	0.09
Castanopsis carlesii	Fagaceae	0.094697	0.017172	0.119949	0.352273
Castanopsis fargesii	Fagaceae	0.1303			0.07649
Castanopsis fissa	Fagaceae	0.14	0.029	0.016	0.13
Castanopsis hystrix	Fagaceae	0.253333	0.056	0.0686667	0.360222
Castanopsis sclerophylla	Fagaceae	0.1487			0.0649
Cecropia angustifolia	Urticaceae	0.13	0.04	0.21
Cecropia obtusa	Cecropiaceae	0.413333	0.0796667
Cedrela serrata	Meliaceae	0.143044	0.0295879	0.0786521
Celtis schippii	Cannabaceae	0.06	0.02
Cenchrus ciliaris	Poaceae	0.054		0.20761
Cespedesia spathulata	Ochnaceae	0.08		0.21
Chamaecyparis obtusa	Cupressaceae	0.121112	0.0322916
Chaunochiton kappleri	Olacaceae	0.06	0.02	0.2
Chenopodium album	Amaranthaceae	0.255	0.112548	0.184598
Chimarrhis gentryana	Rubiaceae	0.05	0.02	0.32
Chromolaena odorata	Asteraceae	0.105	0.0847111	0.0455556
Chrysophyllum sanguinolentum	Sapotaceae	0.13	0.035	0.235
Cinchona officinalis	Rubiaceae	0.09
Cinnamomum floccosum	Lauraceae	0.075	0.02
Citronella incarum	Cardiopteridaceae		0.03
Citrus grandis	Rutaceae	0.0729333	0.00726667	0.025
Clarisia racemosa	Moraceae	0.07	0.02
Cleistanthus polystachyus	Phyllanthaceae	0.141952	0.0401051	0.298173
Clethra cuneata	Clethraceae	0.14	0.05	0.26
Clethra fagifolia	Clethraceae	0.13	0.05	0.14
Clethra scabra	Clethraceae	0.12	0.03
Commersonia magniflora	Malvaceae	0.147735			0.224383
Commersonia salviifolia	Malvaceae	0.170317			0.208713
Cornus controversa	Cornaceae	0.105667	0.0453333	0.292667	0.0593333
Cornus sanguinea	Cornaceae	0.4	0.066	0.056
Corymbia calophylla	Myrtaceae	0.093		0.28
Corymbia maculata	Myrtaceae	0.209709	0.0453894	0.0971538
Cotinus szechuanensis	Anacardiaceae	0.220468	0.0445926	0.0273392	0.257472
Couepia bracteosa	Chrysobalanaceae	0.12	0.04	0.28
Couepia caryophylloides	Chrysobalanaceae	0.188571	0.0374444
Couma macrocarpa	Apocynaceae	0.12	0.04	0.28
Crataegus monogyna	Rosaceae	0.26	0.057	0.039
Cratoxylum cochinchinense	Hypericaceae	0.219715	0.0330888	0.0745794	0.127243
Cryptomeria japonica	Cupressaceae	0.179			0.087
Cucumis sativus	Cucurbitaceae	0.4225	0.082	0.2525
Cupania rubiginosa	Sapindaceae	0.06		0.21
Cybianthus nestorii	Primulaceae	0.11	0.03	0.25
Cyclobalanopsis phanera	Fagaceae	0.2	0.047	0.017	0.29
Cyclobalanopsis?patelliformis	Fagaceae	0.19	0.034	0.018	0.37
Cypripedium flavum	Orchidaceae	0.363333	0.0742333	0.166033
Dalbergia odorifera	Fabaceae	0.161333	0.0368333	0.12	0.0676667
Daphniphyllum humile	Daphniphyllaceae	0.185716	0.0360264	0.162889
Datura stramonium	Solanaceae	0.235	0.0945	0.169792
Dendropanax cuneatus	Araliaceae	0.05	0.02	0.16
Dendropanax resinosus	Araliaceae	0.04		0.26
Dichanthium sericeum	Poaceae	0.061		0.240116
Dicymbe uaiparuensis	Fabaceae	0.08	0.02	0.29
Diospyros morrisiana	Ebenaceae	0.189972	0.0261356	0.0901558	0.129493
Dipteryx alata	Fabaceae	0.15	0.03
Dipteryx micrantha	Fabaceae	0.1	0.02	0.24
Dodonaea viscosa	Sapindaceae	0.288889	0.045009	0.244649	0.099433
Dupontia fisheri	Poaceae	0.218056	0.12838
Echium plantagineum	Boraginaceae	0.184	0.105	0.159207
Elaeocarpus decipiens	Elaeocarpaceae	0.212		0.36
Emmotum floribundum	Icacinaceae	0.06	0.02	0.21
Endlicheria chalisea	Lauraceae	0.09	0.02	0.15
Endlicheria macrophylla	Lauraceae	0.09	0.03	0.23
Engelhardtia roxburghiana	Juglandaceae	0.19453	0.0321453	0.0997298	0.141838
Entandrophragma excelsum	Meliaceae	0.126081	0.0253908	0.108287
Eperua falcata	Fabaceae	0.200635	0.0435556
Eperua grandiflora	Fabaceae	0.151429	0.0305556
Eragrostis superba	Poaceae	0.0665		0.150563
Eriophorum angustifolium	Cyperaceae	0.125397	0.0803432
Eriophorum vaginatum	Cyperaceae	0.0969207	0.0359713	0.0797649
Erythrophleum fordii	Fabaceae	0.185833	0.0448333	0.0865	0.0465
Escallonia paniculata	Escalloniaceae	0.11	0.04
Eschweilera coriacea	Lecythidaceae	0.08	0.03	0.14
Eschweilera itayensis	Lecythidaceae	0.16	0.04	0.37
Eschweilera tessmannii	Lecythidaceae	0.05	0.02	0.2
Eucalyptus globulus	Myrtaceae	0.7553	0.0973
Eucalyptus arenacea	Myrtaceae	0.41	0.144603	0.118796
Eucalyptus badjensis	Myrtaceae	0.16985	0.0410706	0.0804294
Eucalyptus benthamii var. benthamii	Myrtaceae	0.29575	0.0470968	0.0932032
Eucalyptus bosistoana	Myrtaceae	0.22385	0.0473135	0.0931365
Eucalyptus botryoides	Myrtaceae	0.15875	0.0480052	0.0884948
Eucalyptus bridgesiana	Myrtaceae	0.13496			0.147285
Eucalyptus brookeriana	Myrtaceae	0.22015	0.0431325	0.0846175
Eucalyptus camaldulensis	Myrtaceae	0.2538	0.0389	0.21
Eucalyptus cameronii	Myrtaceae	0.13265	0.056708	0.098392
Eucalyptus cypellocarpa	Myrtaceae	0.1686	0.0482728	0.0956772
Eucalyptus delegatensis	Myrtaceae	0.2499	0.0723595	0.0858687
Eucalyptus dendromorpha	Myrtaceae	0.2183	0.0413553	0.0798947
Eucalyptus diversicolor	Myrtaceae	0.20125
Eucalyptus dumosa	Myrtaceae	0.32	0.105436	0.0930233
Eucalyptus dunnii	Myrtaceae	0.2485	0.0466912	0.0908088
Eucalyptus elata	Myrtaceae	0.192727	0.051601	0.096899	0.211465
Eucalyptus fastigata	Myrtaceae	0.30545	0.0489639	0.0949361
Eucalyptus fraxinoides	Myrtaceae	0.2125	0.0412495	0.0819005
Eucalyptus globulus	Myrtaceae	0.244104	0.0766908	0.128243
Eucalyptus goniocalyx	Myrtaceae	0.131	0.07	0.217514
Eucalyptus grandis	Myrtaceae	0.415125	0.0599552	0.120093
Eucalyptus hypochlamydea	Myrtaceae	0.34	0.112503	0.108788
Eucalyptus macrorhyncha	Myrtaceae		0.0655	0.176968
Eucalyptus mannifera	Myrtaceae	0.163668			0.15326
Eucalyptus melliodora	Myrtaceae	0.22475	0.0387882	0.0747618
Eucalyptus moorei	Myrtaceae	0.12043			0.175516
Eucalyptus muelleriana	Myrtaceae	0.2554	0.0536103	0.10084
Eucalyptus nitens	Myrtaceae	0.231433	0.0763287	0.0858207
Eucalyptus obliqua	Myrtaceae	0.190467	0.0427231	0.0831769
Eucalyptus oreades	Myrtaceae	0.1912	0.045213	0.086037
Eucalyptus paniculata	Myrtaceae	0.1826	0.0630952	0.121305
Eucalyptus pauciflora	Myrtaceae	0.113032			0.207548
Eucalyptus polyanthemos	Myrtaceae	0.144139			0.22522
Eucalyptus quadrangulata	Myrtaceae	0.1636	0.0456892	0.0897108
Eucalyptus radiata	Myrtaceae	0.133207			0.129676
Eucalyptus regnans	Myrtaceae	0.239867	0.0841753	0.0998237
Eucalyptus rossii	Myrtaceae	0.159458			0.0719199
Eucalyptus saligna	Myrtaceae	0.240133	0.0508477	0.0938523
Eucalyptus sieberi	Myrtaceae	0.25465	0.0394121	0.0755879
Eucalyptus smithii	Myrtaceae	0.26055	0.0535787	0.101721
Eucalyptus socialis	Myrtaceae	0.4	0.0895521	0.0911314
Eucalyptus tereticornis	Myrtaceae	0.20295	0.0357162	0.0690338
Eucalyptus torquata	Myrtaceae	0.085		0.09
Eucalyptus triflora	Myrtaceae	0.0942	0.0427329	0.0847671
Eucalyptus urophylla	Myrtaceae	0.5639	0.0745
Eucalyptus viminalis	Myrtaceae	0.2667	0.0667149	0.0873995
Eupatorium adenophorum	Asteraceae	0.31207	0.0664654	0.156749	0.104116
Eupatorium chinense	Asteraceae	0.27	0.05	0.25
Eupatorium heterophyllum	Asteraceae	0.222046	0.059648	0.153076
Eupatorium japonicum	Asteraceae	0.237189	0.0586999	0.16255	0.119
Eupatorium stoechadosmum	Asteraceae	0.270379			0.105229
Fagopyrum dibotrys	Polygonaceae	0.203			0.013
Fagus crenata	Fagaceae	0.187058	0.0380703	0.12654
Fagus sylvatica	Fagaceae	0.323823	0.0663205
Falcataria moluccana	Fabaceae	0.541606	0.0698119	0.111809	0.061477
Faurea saligna	Proteaceae	0.22583		0.25917
Ficalhoa laurifolia	Sladeniaceae	0.20754		0.248393
Ficus americana	Moraceae	0.16	0.03	0.2
Ficus schultesii	Moraceae	0.1	0.02
Ficus subulata	Moraceae	0.204043	0.0286955	0.0936507
Ficus tinctoria	Moraceae	0.217783	0.0361111	0.0890625
Fraxinus americana	Oleaceae	0.320626	0.117423	0.170208
Fraxinus rhynchophylla	Oleaceae	0.26683	0.0637618	0.126316
Freziera karsteniana	Pentaphylacaceae	0.15	0.05	0.12
Gallesia integrifolia	Phytolaccaceae	0.08	0.03
Glycine max	Fabaceae	0.331049	0.0560365	0.0825236	0.1278
Glycydendron amazonicum	Euphorbiaceae	0.09	0.03
Gossypium hirsutum	Malvaceae	0.388444	0.0532732	0.0555079
Goupia glabra	Goupiaceae	0.15	0.05	0.17
Guatteria decurrens	Annonaceae	0.1	0.04	0.36
Guatteria schomburgkiana	Annonaceae	0.07		0.15
Guatteria terminalis	Annonaceae	0.11	0.04	0.17
Guazuma crinita	Malvaceae	0.12	0.03
Gustavia hexapetala	Lecythidaceae	0.06	0.01	0.15
Hagenia abyssinica	Rosaceae	0.396023	0.102244	0.123533
Hakea brownii	Proteaceae	0.11423			0.19517
Hakea prostrata	Proteaceae	0.20675		0.11
Hakea salicifolia	Proteaceae	0.126908			0.308605
Hardenbergia comptoniana	Fabaceae	0.11881			0.113082
Hardenbergia violacea	Fabaceae	0.0997909			0.101888
Harungana montana	Hypericaceae	0.181617	0.0615568	0.24793
Hedyosmum maximum	Chloranthaceae	0.06	0.02
Helianthus annuus	Asteraceae	0.454498	0.0626768	0.227847	0.16
Helicostylis scabra	Moraceae	0.09	0.025	0.255
Hevea pauciflora	Euphorbiaceae	0.1	0.03	0.24
Hibbertia scandens	Dilleniaceae	0.266		0.22
Hieronyma asperifolia	Phyllanthaceae	0.06		0.18
Hieronyma macrocarpa	Phyllanthaceae	0.14	0.05	0.16
Hippophae rhamnoides	Elaeagnaceae	0.237271	0.0398963	0.04125	0.126422
Huberodendron switenioides	Malvaceae	0.12	0.02
Humiria balsamifera	Humiriaceae	0.12	0.04	0.34
Humiriastrum excelsum	Humiriaceae	0.07	0.03	0.31
Hydrangea macrophylla	Hydrangeaceae	0.252			0.022
Hymenaea courbaril	Fabaceae	0.288889	0.0686667
Hymenaea longifolia	Fabaceae	0.15	0.03
Ilex biserrulata	Aquifoliaceae	0.11		0.1
Ilex sessiliflora	Aquifoliaceae	0.16		0.12
Incarvillea delavayi	Bignoniaceae	0.145198	0.0322034	0.00564972
Inga capitata	Fabaceae	0.04	0.01	0.14
Inga killipiana	Fabaceae	0.09		0.19
Inga striata	Fabaceae	0.06	0.02	0.14
Iryanthera lancifolia	Myristicaceae	0.12	0.03	0.185
Jacqueshuberia loretensis	Fabaceae	0.12	0.03	0.16
Kandelia obovata	Rhizophoraceae	0.269402	0.0533773	0.110996
Karelinia caspia	Asteraceae	0.23	0.04	0.13
Kennedia rubicunda	Fabaceae	0.048		0.15
Ladenbergia magnifolia	Rubiaceae	0.14	0.05	0.24
Larix gmelinii	Pinaceae	0.4033	0.06025	0.20775
Larix kaempferi	Pinaceae	0.317167	0.104717	0.2255
Lasiopetalum discolor	Malvaceae	0.101105			0.190094
Lasiopetalum schulzenii	Malvaceae	0.145585			0.110818
Laurus nobilis	Lauraceae	0.133974	0.0302015
Leucaena leucocephala	Fabaceae	0.430657	0.08953	0.137149	0.060989
Leymus chinensis	Poaceae	0.123354	0.0248003	0.101557	0.0929
Licania arachnoidea	Chrysobalanaceae	0.12	0.04	0.27
Licania heteromorpha	Chrysobalanaceae	0.235238	0.0525556
Licania indet	Chrysobalanaceae	0.05	0.01	0.11
Licania latifolia	Chrysobalanaceae	0.15	0.06	0.32
Licania unguiculata	Chrysobalanaceae	0.07	0.02	0.18
Licaria cannella	Lauraceae	0.065	0.02	0.18
Lindera umbellata	Lauraceae	0.137043		0.196358	0.0727891
Lithocarpus fenzelianus	Fagaceae	0.15	0.031	0.015	0.28
Lithocarpus glaber	Fagaceae	0.1431			0.06891
Lolium perenne	Poaceae	0.2045	0.0905	0.13
Lophatherum gracile	Poaceae	0.100741	0.0141509	0.0880374	0.0808231
Loropetalum chinense	Hamamelidaceae	0.1628			0.05691
Lueheopsis althaeiflora	Malvaceae	0.09	0.02	0.16
Macaranga kilimandscharica	Euphorbiaceae	0.176123	0.0478356	0.123362
Macoubea sprucei	Apocynaceae	0.14	0.04	0.4
Macrolobium microcalyx	Fabaceae	0.07	0.02	0.28
Magnolia montana	Magnoliaceae	0.111208	0.0214917
Magnolia?hypoleuca	Magnoliaceae	0.193667	0.14	0.176
Mahonia japonica	Berberidaceae	0.181			0.065
Mallotus japonicus	Euphorbiaceae	0.164			0.017
Matayba guianensis	Sapindaceae			0.29
Medicago sativa	Fabaceae	0.267833	0.0596653	0.158854
Mezilaurus synandra	Lauraceae	0.06		0.43
Miconia atrofusca	Melastomataceae	0.14
Miconia coelestis	Melastomataceae	0.145	0.045	0.18
Miconia denticulata	Melastomataceae	0.1		0.39
Miconia media	Melastomataceae	0.1
Miconia pyrifolia	Melastomataceae	0.12	0.03
Miconia setulosa	Melastomataceae	0.15	0.04	0.2
Micrandra elata	Euphorbiaceae	0.04	0.02	0.25
Micrandra spruceana	Euphorbiaceae	0.055	0.03	0.135
Micropholis guyanensis	Sapotaceae	0.0633333	0.03	0.116667
Mikania micrantha	Asteraceae	0.1775	0.0976	0.0498333
Minquartia guianensis	Olacaceae	0.1	0.03	0.27
Morella pavonis	Myricaceae	0.13	0.05
Morus australis	Moraceae	0.246			0.038
Mouriri nigra	Melastomataceae	0.04	0.01	0.19
Musa paradisiaca	Musaceae	0.295	0.011	0.198
Myrcia fallax	Myrtaceae	0.07		0.19
Myrcia mollis	Myrtaceae	0.08	0.03	0.17
Myrciaria floribunda	Myrtaceae	0.03		0.26
Myrica rubra	Myricaceae	0.1679			0.04836
Myrsine andina	Primulaceae	0.12
Myrsine coriacea	Primulaceae	0.0966667	0.05	0.17
Myrsine youngii	Primulaceae	0.09	0.01
Naucleopsis mello-barretoi	Moraceae	0.04		0.3
Nealchornea yapurensis	Euphorbiaceae	0.12	0.04	0.47
Nectandra amazonum	Lauraceae	0.03		0.31
Nectandra cuspidata	Lauraceae	0.14	0.05	0.26
Nectandra purpurea	Lauraceae	0.16	0.03
Neolitsea sericea	Lauraceae	0.186			0.089
Nerium oleander	Apocynaceae	0.1745	0.0505	0.17717
Nicotiana tabacum	Solanaceae	0.2065	0.0785	0.191391
Ocotea aciphylla	Lauraceae	0.08	0.03	0.23
Ocotea bofo	Lauraceae	0.08	0.02
Ocotea cernua	Lauraceae	0.11	0.03	0.34
Ocotea kenyensis	Lauraceae	0.131537	0.0295482	0.130189
Ocotea myriantha	Lauraceae	0.04		0.16
Odontarrhena chalcidica	Brassicaceae	0.46	0.077	0.16
Odontarrhena moravensis	Brassicaceae	0.54	0.106	0.17
Odontarrhena muralis	Brassicaceae	0.48	0.064	0.33
Olea europaea	Oleaceae	0.127438	0.0280961
Ormosia fordiana	Fabaceae	0.099	0.024	0.013	0.24
Ormosia?balansae	Fabaceae	0.12	0.025	0.016	0.3
Ormosia?semicastrata	Fabaceae	0.16	0.034	0.018	0.23
Oryza sativa	Poaceae	0.298711	0.0707889	0.151236	0.0439375
Osteomeles anthyllidifolia	Rosaceae	0.277859	0.123336	0.183344	0.107705
Osteophloeum platyspermum	Myristicaceae	0.09	0.025	0.25
Oxalis corymbosa	Oxalidaceae	0.737	0.1
Oxalis triangularis	Oxalidaceae	0.214	0.04
Panax notoginseng	Araliaceae	0.123274	0.0456681	0.170347
Panicum coloratum	Poaceae	0.0725		0.158799
Panicum decompositum	Poaceae	0.076		0.18455
Panicum miliaceum	Poaceae	0.058		0.131674
Panicum virgatum	Poaceae	0.053		0.172771
Parahancornia peruviana	Apocynaceae	0.07	0.03	0.39
Paspalum dilatatum	Poaceae	0.073		0.184718
Paspalum notatum	Poaceae	0.0785		0.202458
Peganum harmala	Nitrariaceae	0.11	0.03	0.17
Pennisetum clandestinum	Poaceae	0.0505		0.179257
Peperomia caperata	Piperaceae	0.194	0.038
Peperomia pellucida	Piperaceae	0.6625	0.107	0.196
Peperomia tetraphylla	Piperaceae	0.125	0.02	0.243
Persea buchtienii	Lauraceae	0.095	0.02	0.16
Persea corymbosa	Lauraceae	0.08	0.02	0.28
Persicaria thunbergii	Polygonaceae	0.331			0.067
Petasites frigidus	Asteraceae	0.141667	0.0806186
Phragmites communis	Poaceae	0.245			0.054
Phyllostachys bambusoides	Poaceae	0.213			0.057
Physalis peruviana	Solanaceae	0.2185	0.059	0.186562
Picea abies	Pinaceae	0.0972138	0.0239418	0.0772557
Picea brachytyla	Pinaceae	0.248112	0.041812		0.168103
Picea crassifolia	Pinaceae	0.0164	0.0085	0.0074
Picea glauca	Pinaceae	0.1196	0.0371	0.0274
Picea koraiensis	Pinaceae	0.0368	0.01	0.0101
Picea likiangensis	Pinaceae	0.0565	0.0166	0.0216
Picea mariana	Pinaceae	0.0383	0.0123	0.0166
Picea sitchensis	Pinaceae	0.203819		0.0781051
Pinus densiflora	Pinaceae	0.173045	0.0338474	0.0829263
Pinus elliottii	Pinaceae	0.29895	0.0503455	0.0872798
Pinus massoniana	Pinaceae	0.22567	0.0697599	0.0952568	0.0810673
Pinus pinaster	Pinaceae	0.179002		0.130596
Pinus pumila	Pinaceae	0.2185			0.3865
Pinus radiata	Pinaceae	0.143394	0.0704773	0.144365
Pinus sylvestris	Pinaceae	0.182224	0.0236749	0.105356
Pinus taeda	Pinaceae	0.0300667		0.0508431
Piper sarmentosum	Piperaceae	0.233	0.042	0.244
Piper?hispidinervum	Piperaceae	0.426	0.054	0.228
Pipturus albidus	Urticaceae	0.307867	0.100102	0.172009	0.106407
Pisum sativum	Fabaceae	0.270706
Pithecellobium clypearia	Fabaceae	0.12	0.026	0.015	0.15
Pithecellobium?lucidum	Fabaceae	0.12	0.027	0.016	0.09
Plantago major	Plantaginaceae	0.1895	0.0975	0.157228
Poa alpina	Poaceae	0.167826	0.050213	0.118961
Poa annua	Poaceae	0.278208	0.085491	0.119301
Poa compressa	Poaceae	0.23571	0.08439	0.1649
Poa costiniana	Poaceae	0.22908	0.05478	0.13114
Poa fawcettiae	Poaceae	0.28121	0.054398	0.125392
Poa pratensis	Poaceae	0.277728	0.07656	0.173712
Poa trivialis	Poaceae	0.256372	0.058636	0.11342
Podocarpus falcatus	Podocarpaceae	0.082154	0.0201974	0.0842498
Podocarpus oleifolius	Podocarpaceae	0.06
Polygonum cuspidatum	Polygonaceae	0.216667			0.0673333
Polyscias fulva	Araliaceae	0.205476	0.0499545	0.105517
Pomaderris apetala	Rhamnaceae	0.149716			0.161658
Pomaderris eriocephala	Rhamnaceae	0.088469			0.162097
Populus cathayana	Salicaceae	0.237083	0.056	0.033105	0.2045
Populus deltoides	Salicaceae	0.302737	0.0358343	0.151615	0.142863
Populus deltoides × Populus nigra	Salicaceae	0.182378	0.0274612	0.0455846
Populus grandidentata	Salicaceae	0.313454	0.0353098	0.1379
Populus purdomii	Salicaceae	0.301789	0.0471111		0.114063
Populus tremuloides	Salicaceae	0.379545	0.0720538	0.145639
Populus × canadensis	Salicaceae	0.147831	0.0292677	0.0743189	0.426532
Poulsenia armata	Moraceae	0.14	0.04
Pourouma bicolor	Urticaceae	0.1325	0.035	0.2075
Pourouma guianensis	Urticaceae	0.13	0.02	0.21
Pourouma minor	Urticaceae	0.11	0.02
Pouteria caimito	Sapotaceae	0.15	0.04	0.27
Pouteria filipes	Sapotaceae	0.055	0.02	0.17
Pouteria franciscana	Sapotaceae	0.08	0.02
Pouteria guianensis	Sapotaceae	0.06		0.27
Pouteria lucumifolia	Sapotaceae	0.05		0.32
Pouteria platyphylla	Sapotaceae	0.08	0.02	0.27
Pouteria sagotiana	Sapotaceae	0.06	0.02	0.19
Pouteria torta	Sapotaceae	0.1	0.03	0.24
Primula denticulata	Primulaceae	0.357	0.118	0.028
Primula pseudodenticulata	Primulaceae	0.317	0.096	0.028
Protium paniculatum	Burseraceae	0.07	0.03	0.28
Protium polybotryum	Burseraceae	0.1	0.04	0.17
Protium sagotianum	Burseraceae	0.07	0.03	0.35
Protium spruceanum	Burseraceae	0.1	0.03	0.31
Prunus africana	Rosaceae	0.229241	0.041248	0.239757
Prunus integrifolia	Rosaceae	0.06
Prunus persica	Rosaceae	0.129359	0.0595536	0.121811
Prunus pleiantha	Rosaceae	0.14	0.04	0.25
Prunus ssiori	Rosaceae	0.202667	0.0833333	0.212333
Pseudolmedia laevigata	Moraceae	0.1		0.16
Pseudolmedia laevis	Moraceae	0.1	0.03
Pseudolmedia macrophylla	Moraceae	0.07	0.02
Pseudolmedia rigida	Moraceae	0.11	0.035	0.295
Pseudotsuga menziesii	Pinaceae	0.145517	0.0348855	0.122274
Psidium cattleianum	Myrtaceae	0.544688	0.0518119	0.0958296	0.049797
Psychotria rubra	Rubiaceae	0.166382	0.0248078	0.0953065	0.134321
Pueraria lobata	Fabaceae	0.137			0.028
Pyracantha angustifolia	Rosaceae	0.319546	0.114536	0.190259	0.090186
Qualea paraensis	Vochysiaceae	0.09	0.02	0.32
Quercus acuta	Fagaceae	0.167692	0.047864	0.089059	0.182
Quercus alba	Fagaceae	0.173909
Quercus crispula	Fagaceae	0.206044	0.0548805	0.120462	0.0565
Quercus glauca	Fagaceae	0.162393	0.044957	0.084787	0.179
Quercus ilex	Fagaceae	0.140024	0.0348832
Quercus mongolica	Fagaceae	0.222667	0.0771667	0.188
Quercus myrsinifolia	Fagaceae	0.132			0.131
Quercus serrata	Fagaceae	0.249462	0.064274	0.110427	0.097
Quercus suber	Fagaceae	0.1925	0.0369	0.0887302
Radyera farragei	Malvaceae	0.1615	0.073	0.151699
Raphanus sativus	Brassicaceae	0.246	0.1245	0.1594
Reynoutria japonica	Polygonaceae	0.237333	0.0735667	0.148	0.0868667
Reynoutria sachalinensis	Polygonaceae	0.313			0.06
Rhigospira quadrangularis	Apocynaceae	0.12	0.05	0.29
Rhododendron decorum	Ericaceae	0.232169	0.0503248	0.0484708	0.175862
Rhododendron rubiginosum	Ericaceae	0.24	0.06	0.048012
Rhododendron yunnanense	Ericaceae	0.31	0.08	0.0776445
Robinia pseudoacacia	Fabaceae	0.249333	0.0502778	0.0925	0.236
Roucheria schomburgkii	Linaceae	0.13	0.05	0.36
Roupala monosperma	Proteaceae	0.14	0.05	0.23
Rumex dentatus	Polygonaceae	0.4175	0.19
Rumex obtusifolius	Polygonaceae	0.301			0.022
Ruptiliocarpon caracolito	Lepidobotryaceae	0.08	0.025	0.24
Salix magnifica	Salicaceae	0.275119	0.0453333		0.121955
Salix phanera	Salicaceae	0.32735	0.0501538
Salix pulchra	Salicaceae	0.141071	0.0764549
Salix rehderiana	Salicaceae	0.310032	0.0464274		0.0979885
Sambucus nigra	Viburnaceae	0.35	0.061	0.032
Schefflera allocotantha	Araliaceae	0.11		0.17
Schefflera patula	Araliaceae	0.06	0.02	0.17
Schima superba	Theaceae	0.217345	0.0383007	0.0993651	0.126572
Schinus terebinthifolius	Anacardiaceae	0.309651	0.0776667	0.152489	0.129278
Senefeldera inclinata	Euphorbiaceae	0.04	0.02	0.22
Simarouba amara	Simaroubaceae	0.09	0.03	0.16
Sloanea brevipes	Elaeocarpaceae	0.135	0.035	0.37
Sloanea floribunda	Elaeocarpaceae	0.05	0.02	0.24
Sloanea gladysiae	Elaeocarpaceae	0.09	0.04	0.47
Sloanea robusta	Elaeocarpaceae	0.12	0.04	0.37
Solanum melongena	Solanaceae	0.201		0.159345
Solanum tuberosum	Solanaceae	0.2575	0.0772576	0.145
Solidago virgaurea	Asteraceae	0.229226	0.090738	0.259292
Sophora chrysophylla	Fabaceae	0.336902	0.106792	0.175801	0.065693
Sophora davidii	Fabaceae	0.211501	0.0384568	0.0365887	0.159962
Sorbus alnifolia	Rosaceae	0.26688	0.0546338	0.122456
Sorocea pileata	Moraceae	0.06	0.02
Sorocea trophoides	Moraceae	0.07	0.02
Spartina alterniflora	Poaceae	0.11555			0.053075
Strombosia scheffleri	Olacaceae	0.0725973	0.0258364	0.270541
Styrax foveolaria	Styracaceae	0.09	0.02
Swartzia polyphylla	Fabaceae	0.07	0.02	0.16
Swietenia macrophylla	Meliaceae	0.187979	0.0334343
Symphonia globulifera	Clusiaceae	0.274286	0.0572222
Symplocos psiloclada	Symplocaceae	0.1		0.21
Symplocos sumuntia	Symplocaceae	0.1507			0.06005
Syzygium guineense	Myrtaceae	0.123299	0.0315512	0.141371
Tabebuia insignis	Bignoniaceae	0.323175	0.0655
Tachigali bracteosa	Fabaceae	0.06		0.23
Talisia sylvatica	Sapindaceae	0.06	0.02	0.12
Tamarix ramosissima	Tamaricaceae	0.11	0.03	0.2
Tapirira guianensis	Anacardiaceae	0.11	0.04	0.27
Taralea oppositifolia	Fabaceae	0.02		0.34
Terminalia oblonga	Combretaceae	0.09	0.02
Thuja plicata	Cupressaceae	0.169444		0.050272
Tilia cordata	Malvaceae	0.279586	0.122848	0.344439
Torreya grandis	Taxaceae?	0.0769167	0.0194167	0.03125
Tovomita calophyllophylla	Clusiaceae	0.05	0.02	0.29
Trattinnickia glaziovii	Burseraceae	0.16	0.04
Triticum aestivum	Poaceae	0.264321	0.0568613	0.0961335	0.0592538
Tsoongiodendron lotungensis	Magnoliaceae	0.181	0.022	0.041
Tsuga heterophylla	Pinaceae	0.0784259		0.033195
Ulmus elongata	Ulmaceae	0.285	0.025	0.041
Viminaria juncea	Fabaceae	0.10275		0.1375
Virola michelii	Myristicaceae	0.19873	0.0346667
Virola pavonis	Myristicaceae	0.12	0.03	0.265
Virola sebifera	Myristicaceae	0.06		0.17
Virola surinamensis	Myristicaceae	0.293968	0.0642778
Vismia amazonica	Hypericaceae	0.2	0.06	0.25
Vismia schultesii	Hypericaceae	0.21	0.06	0.26
Vochysia divergens	Vochysiaceae	0.162	0.0225	0.004
Vouacapoua americana	Fabaceae	0.149206	0.0281111
Wedelia chinensis	Asteraceae	0.21	0.04	0.1
Wedelia trilobata	Asteraceae	0.33	0.07	0.11
Wedelia urticifolia	Asteraceae	0.23	0.05	0.09
Weinmannia auriculata	Cunoniaceae	0.1	0.03	0.25
Weinmannia lechleriana	Cunoniaceae	0.19		0.33
Weinmannia pubescens	Cunoniaceae	0.1	0.04
Woonyoungia septentrionalis	Magnoliaceae	0.293	0.041	0.052
Xanthium canadense	Asteraceae	0.267			0.042
Zanthoxylum ailanthoides	Rutaceae	0.22			0.023
Zea mays	Poaceae	0.0914167	0.054	0.2505	0.1005
Ziziphus?attopensis	Rhamnaceae	0.364667	0.0653333

## Sheet: Figure 2
Species	Family	Replicates	Divergence time	PR	PB	PL	Pcw
Kandelia obovata	Rhizophoraceae	4	98.2332	0.269402	0.0533772	0.110996
Alchornea anamariae	Euphorbiaceae	1	96.4903	0.1	0.03	0.23
Alchornea anamariae	Euphorbiaceae	1	96.4903	0.11	0.04	0.25
Alchornea triplinervia	Euphorbiaceae	1	96.4903	0.11	0.03	0.09
Aniba perutilis	Lauraceae	1	118.36	0.08	0.03	0.24
Apeiba aspera	Malvaceae	1	110.033	0.2	0.03
Aptandra liriosmoides	Olacaceae	1	132.193	0.04		0.29
Aspidosperma desmanthum	Apocynaceae	1	99.5431	0.09	0.03	0.17
Aspidosperma desmanthum	Apocynaceae	1	99.5431	0.09	0.03	0.18
Aspidosperma excelsum	Apocynaceae	1	99.5431	0.07		0.25
Beilschmiedia latifolia	Lauraceae	1	118.36	0.11	0.04	0.34
Bertholletia excelsa	Lecythidaceae	1	123.573	0.16	0.03
Bixa arborea	Bixaceae	1	93.9099	0.14	0.04
Brosimum potabile	Moraceae	1	81.4413	0.04		0.12
Brosimum rubescens	Moraceae	1	81.4413	0.05	0.02
Brosimum rubescens	Moraceae	1	81.4413	0.13	0.03	0.17
Brosimum utile	Moraceae	1	81.4413	0.11	0.03	0.16
Brunellia stenoptera	Brunelliaceae	1	90.6534		0.06	0.17
Buchenavia tomentosa	Combretaceae	1	115.767	0.06	0.02	0.19
Cabralea canjerana	Meliaceae	1	90.9524	0.07	0.03	0.2
Calyptranthes bipennis	Myrtaceae	1	102.451	0.07	0.02	0.29
Caraipa punctulata	Clusiaceae	1	105.258	0.1	0.03	0.17
Caraipa tereticaulis	Clusiaceae	1	105.258	0.12		0.19
Cecropia angustifolia	Urticaceae	1	81.4413	0.13	0.04	0.21
Celtis schippii	Cannabaceae	1	87.7138	0.06	0.02
Cespedesia spathulata	Ochnaceae	1	114.612	0.08		0.21
Chaunochiton kappleri	Olacaceae	1	132.193	0.06	0.02	0.2
Chimarrhis gentryana	Rubiaceae	1	111.501	0.05	0.02	0.32
Chrysophyllum sanguinolentum	Sapotaceae	1	125.177	0.12	0.04	0.22
Chrysophyllum sanguinolentum	Sapotaceae	1	125.177	0.14	0.03	0.25
Cinchona officinalis	Rubiaceae	1	111.501	0.09
Cinnamomum floccosum	Lauraceae	1	118.36	0.07
Cinnamomum floccosum	Lauraceae	1	118.36	0.08	0.02
Citronella incarum	Cardiopteridaceae	1	103.156		0.03
Clarisia racemosa	Moraceae	1	81.4413	0.07	0.02
Clethra cuneata	Clethraceae	1	112.557	0.14	0.05	0.26
Clethra cuneata	Clethraceae	1	112.557	0.14	0.05
Clethra fagifolia	Clethraceae	1	112.557	0.13	0.05	0.14
Clethra scabra	Clethraceae	1	112.557	0.12	0.03
Couepia bracteosa	Chrysobalanaceae	1	77.2542	0.12	0.04	0.28
Couma macrocarpa	Apocynaceae	1	99.5431	0.12	0.04	0.28
Cupania rubiginosa	Sapindaceae	1	105.652	0.06		0.21
Cybianthus nestorii	Primulaceae	1	130.382	0.11	0.03	0.25
Dendropanax cuneatus	Araliaceae	1	82.6946	0.05	0.02	0.16
Dendropanax resinosus	Araliaceae	1	82.6946	0.04		0.26
Dicymbe uaiparuensis	Fabaceae	1	111.456	0.08	0.02	0.29
Dipteryx alata	Fabaceae	1	111.456	0.15	0.03
Dipteryx micrantha	Fabaceae	1	111.456	0.1	0.02	0.24
Emmotum floribundum	Icacinaceae	1	129.285	0.03	0.01	0.16
Emmotum floribundum	Icacinaceae	1	129.285	0.09	0.03	0.26
Endlicheria chalisea	Lauraceae	1	118.36	0.09	0.02	0.15
Endlicheria macrophylla	Lauraceae	1	118.36	0.09	0.03	0.23
Escallonia paniculata	Escalloniaceae	1	122.094	0.11	0.04
Eschweilera coriacea	Lecythidaceae	1	123.573	0.08	0.03	0.14
Eschweilera itayensis	Lecythidaceae	1	123.573	0.16	0.04	0.37
Eschweilera tessmannii	Lecythidaceae	1	123.573	0.05	0.02	0.2
Ficus americana	Moraceae	1	81.4413	0.16	0.03	0.2
Ficus schultesii	Moraceae	1	81.4413	0.1	0.02
Freziera karsteniana	Pentaphylacaceae	1	113.474	0.15	0.05	0.12
Gallesia integrifolia	Phytolaccaceae	1	75.7124	0.08	0.03
Glycydendron amazonicum	Euphorbiaceae	1	96.4903	0.09	0.03
Goupia glabra	Goupiaceae	1	113.076	0.15	0.05	0.17
Guatteria decurrens	Annonaceae	1	106.098	0.1	0.04	0.36
Guatteria schomburgkiana	Annonaceae	1	106.098	0.07		0.15
Guatteria terminalis	Annonaceae	1	106.098	0.11	0.04	0.17
Guazuma crinita	Malvaceae	1	110.033	0.12	0.03
Gustavia hexapetala	Lecythidaceae	1	123.573	0.06	0.01	0.15
Hedyosmum maximum	Chloranthaceae	1	153.94	0.06	0.02
Helicostylis scabra	Moraceae	1	81.4413	0.08	0.02	0.19
Helicostylis scabra	Moraceae	1	81.4413	0.1	0.03	0.32
Hevea pauciflora	Euphorbiaceae	1	96.4903	0.1	0.03	0.24
Hieronyma asperifolia	Phyllanthaceae	1	106.574	0.06		0.18
Hieronyma macrocarpa	Phyllanthaceae	1	106.574	0.14	0.05	0.16
Huberodendron switenioides	Malvaceae	1	110.033	0.12	0.02
Humiria balsamifera	Humiriaceae	1	120.041	0.12	0.04	0.34
Humiriastrum excelsum	Humiriaceae	1	120.041	0.07	0.03	0.31
Hymenaea longifolia	Fabaceae	1	111.456	0.15	0.03
Ilex biserrulata	Aquifoliaceae	1	84.5455	0.11		0.1
Ilex sessiliflora	Aquifoliaceae	1	84.5455	0.16		0.12
Inga capitata	Fabaceae	1	111.456	0.04	0.01	0.14
Inga killipiana	Fabaceae	1	111.456	0.09		0.19
Inga striata	Fabaceae	1	111.456	0.06	0.02	0.14
Iryanthera lancifolia	Myristicaceae	1	135.405	0.11	0.03	0.17
Iryanthera lancifolia	Myristicaceae	1	135.405	0.13	0.03	0.2
Jacqueshuberia loretensis	Fabaceae	1	111.456	0.12	0.03	0.16
Ladenbergia magnifolia	Rubiaceae	1	111.501	0.14	0.05	0.24
Licania arachnoidea	Chrysobalanaceae	1	77.2542	0.12	0.04	0.27
Licania indet	Chrysobalanaceae	1	77.2542	0.05	0.01	0.11
Licania latifolia	Chrysobalanaceae	1	77.2542	0.15	0.06	0.32
Licania unguiculata	Chrysobalanaceae	1	77.2542	0.07	0.02	0.18
Licaria cannella	Lauraceae	1	118.36		0.02
Licaria cannella	Lauraceae	1	118.36	0.08	0.02	0.21
Licaria cannella	Lauraceae	1	118.36	0.05		0.15
Lueheopsis althaeiflora	Malvaceae	1	110.033	0.09	0.02	0.16
Macoubea sprucei	Apocynaceae	1	99.5431	0.14	0.04	0.4
Macrolobium microcalyx	Fabaceae	1	111.456	0.07	0.02	0.28
Matayba guianensis	Sapindaceae	1	105.652			0.27
Matayba guianensis	Sapindaceae	1	105.652			0.31
Mezilaurus synandra	Lauraceae	1	118.36	0.06		0.43
Miconia atrofusca	Melastomataceae	1	84.9277	0.14
Miconia coelestis	Melastomataceae	1	84.9277	0.22	0.07	0.18
Miconia coelestis	Melastomataceae	1	84.9277	0.07	0.02
Miconia denticulata	Melastomataceae	1	84.9277	0.1		0.39
Miconia media	Melastomataceae	1	84.9277	0.1
Miconia pyrifolia	Melastomataceae	1	84.9277	0.12	0.03
Miconia setulosa	Melastomataceae	1	84.9277	0.15	0.04	0.2
Micrandra elata	Euphorbiaceae	1	96.4903	0.04	0.02	0.25
Micrandra spruceana	Euphorbiaceae	1	96.4903	0.08	0.03	0.15
Micrandra spruceana	Euphorbiaceae	1	96.4903	0.03		0.12
Micropholis guyanensis	Sapotaceae	1	125.177	0.04		0.12
Micropholis guyanensis	Sapotaceae	1	125.177	0.06	0.02	0.05
Micropholis guyanensis	Sapotaceae	1	125.177	0.09	0.04	0.18
Minquartia guianensis	Olacaceae	1	132.193	0.13	0.03	0.3
Minquartia guianensis	Olacaceae	1	132.193	0.07	0.03	0.24
Morella pavonis	Myricaceae	1	91.2447	0.13	0.05
Mouriri nigra	Melastomataceae	1	84.9277	0.04	0.01	0.19
Mouriri nigra	Melastomataceae	1	84.9277	0.04	0.01	0.19
Myrcia fallax	Myrtaceae	1	102.451	0.07		0.19
Myrcia mollis	Myrtaceae	1	102.451	0.08	0.03	0.17
Myrciaria floribunda	Myrtaceae	1	102.451	0.03		0.26
Myrsine andina	Primulaceae	1	130.382	0.12
Myrsine coriacea	Primulaceae	1	130.382	0.11
Myrsine coriacea	Primulaceae	1	130.382	0.15	0.05	0.17
Myrsine coriacea	Primulaceae	1	130.382	0.03
Myrsine youngii	Primulaceae	1	130.382	0.09	0.01
Naucleopsis mello-barretoi	Moraceae	1	81.4413	0.04		0.3
Nealchornea yapurensis	Euphorbiaceae	1	96.4903	0.12	0.04	0.47
Nectandra amazonum	Lauraceae	1	118.36	0.03		0.31
Nectandra cuspidata	Lauraceae	1	118.36	0.14	0.05	0.26
Nectandra purpurea	Lauraceae	1	118.36	0.16	0.03
Ocotea aciphylla	Lauraceae	1	118.36	0.08	0.03	0.23
Ocotea bofo	Lauraceae	1	118.36	0.08	0.02
Ocotea cernua	Lauraceae	1	118.36	0.09	0.03	0.34
Ocotea cernua	Lauraceae	1	118.36	0.13
Ocotea myriantha	Lauraceae	1	118.36	0.04		0.16
Osteophloeum platyspermum	Myristicaceae	1	135.405	0.11	0.03	0.29
Osteophloeum platyspermum	Myristicaceae	1	135.405	0.07	0.02	0.21
Parahancornia peruviana	Apocynaceae	1	99.5431	0.07		0.41
Parahancornia peruviana	Apocynaceae	1	99.5431	0.07	0.03	0.37
Persea buchtienii	Lauraceae	1	118.36	0.09	0.02
Persea buchtienii	Lauraceae	1	118.36	0.1		0.16
Persea corymbosa	Lauraceae	1	118.36	0.08	0.02	0.28
Podocarpus oleifolius	Podocarpaceae	1	#N/A	0.06
Poulsenia armata	Moraceae	1	81.4413	0.14	0.04
Pourouma bicolor	Urticaceae	1	81.4413	0.11	0.03	0.2
Pourouma bicolor	Urticaceae	1	81.4413	0.13	0.03	0.2
Pourouma bicolor	Urticaceae	1	81.4413	0.15	0.04	0.27
Pourouma bicolor	Urticaceae	1	81.4413	0.14	0.04	0.16
Pourouma guianensis	Urticaceae	1	81.4413	0.13	0.02	0.21
Pourouma minor	Urticaceae	1	81.4413	0.11	0.02
Pouteria caimito	Sapotaceae	1	125.177	0.15	0.04	0.27
Pouteria filipes	Sapotaceae	1	125.177	0.04	0.02	0.18
Pouteria filipes	Sapotaceae	1	125.177	0.07		0.16
Pouteria franciscana	Sapotaceae	1	125.177	0.08	0.02
Pouteria guianensis	Sapotaceae	1	125.177	0.06		0.27
Pouteria lucumifolia	Sapotaceae	1	125.177	0.05		0.32
Pouteria platyphylla	Sapotaceae	1	125.177	0.08	0.02	0.27
Pouteria sagotiana	Sapotaceae	1	125.177	0.06	0.02	0.19
Pouteria torta	Sapotaceae	1	125.177	0.1	0.03
Pouteria torta	Sapotaceae	1	125.177	0.12	0.03
Pouteria torta	Sapotaceae	1	125.177	0.08	0.03	0.24
Protium paniculatum	Burseraceae	1	84.1202	0.07	0.03	0.28
Protium polybotryum	Burseraceae	1	84.1202	0.1	0.04	0.17
Protium sagotianum	Burseraceae	1	84.1202	0.07	0.03	0.35
Protium spruceanum	Burseraceae	1	84.1202	0.1	0.03	0.31
Prunus integrifolia	Rosaceae	1	124.438	0.06
Prunus pleiantha	Rosaceae	1	124.438	0.14	0.04	0.25
Pseudolmedia laevigata	Moraceae	1	81.4413	0.1		0.16
Pseudolmedia laevis	Moraceae	1	81.4413	0.13	0.03
Pseudolmedia laevis	Moraceae	1	81.4413	0.07	0.03
Pseudolmedia macrophylla	Moraceae	1	81.4413	0.07	0.02
Pseudolmedia rigida	Moraceae	1	81.4413	0.17	0.05	0.42
Pseudolmedia rigida	Moraceae	1	81.4413	0.05	0.02	0.17
Qualea paraensis	Vochysiaceae	1	102.451	0.09	0.02	0.32
Rhigospira quadrangularis	Apocynaceae	1	99.5431	0.12	0.05	0.29
Roucheria schomburgkii	Linaceae	1	114.612	0.13	0.05	0.36
Roupala monosperma	Proteaceae	1	118.699	0.14	0.05	0.23
Ruptiliocarpon caracolito	Lepidobotryaceae	1	110.912	0.07	0.02	0.07
Ruptiliocarpon caracolito	Lepidobotryaceae	1	110.912	0.09	0.03	0.41
Schefflera allocotantha	Araliaceae	1	82.6946	0.11		0.17
Schefflera patula	Araliaceae	1	82.6946	0.06	0.02	0.17
Senefeldera inclinata	Euphorbiaceae	1	96.4903	0.04	0.02	0.22
Simarouba amara	Simaroubaceae	1	87.7137	0.09	0.03	0.16
Sloanea brevipes	Elaeocarpaceae	1	90.6534	0.15	0.03
Sloanea brevipes	Elaeocarpaceae	1	90.6534	0.12	0.04	0.37
Sloanea floribunda	Elaeocarpaceae	1	90.6534	0.05	0.02	0.24
Sloanea gladysiae	Elaeocarpaceae	1	90.6534	0.09	0.04	0.47
Sloanea robusta	Elaeocarpaceae	1	90.6534	0.12	0.04	0.37
Sorocea pileata	Moraceae	1	81.4413	0.06	0.02
Sorocea trophoides	Moraceae	1	81.4413	0.07	0.02
Styrax foveolaria	Styracaceae	1	109.874	0.09	0.02
Swartzia polyphylla	Fabaceae	1	111.456	0.07	0.02	0.16
Symplocos psiloclada	Symplocaceae	1	117.607	0.1		0.21
Tachigali bracteosa	Fabaceae	1	111.456	0.06		0.23
Talisia sylvatica	Sapindaceae	1	105.652	0.06	0.02	0.12
Tapirira guianensis	Anacardiaceae	1	84.1202	0.11	0.04	0.27
Taralea oppositifolia	Fabaceae	1	111.456	0.02		0.34
Terminalia oblonga	Combretaceae	1	115.767	0.09	0.02
Tovomita calophyllophylla	Clusiaceae	1	105.258	0.05	0.02	0.29
Trattinnickia glaziovii	Burseraceae	1	84.1202	0.16	0.04
Virola pavonis	Myristicaceae	1	135.405	0.16	0.04	0.39
Virola pavonis	Myristicaceae	1	135.405	0.08	0.02	0.14
Virola sebifera	Myristicaceae	1	135.405	0.06		0.17
Vismia amazonica	Hypericaceae	1	81.214	0.2	0.06	0.25
Vismia schultesii	Hypericaceae	1	81.214	0.21	0.06	0.26
Weinmannia auriculata	Cunoniaceae	1	90.0798	0.1	0.03	0.25
Weinmannia lechleriana	Cunoniaceae	1	90.0798	0.19		0.33
Weinmannia pubescens	Cunoniaceae	1	90.0798	0.1	0.04
Picea sitchensis	Pinaceae	5	139.338	0.203819		0.0781051
Thuja plicata	Cupressaceae	5	139.338	0.169444		0.050272
Tsuga heterophylla	Pinaceae	5	139.338	0.0784259		0.033195
Pinus densiflora	Pinaceae	3	139.338	0.21537	0.0341451	0.027361
Fraxinus rhynchophylla	Oleaceae	3	79.4333	0.279115	0.0436856	0.0665191
Sorbus alnifolia	Rosaceae	3	124.438	0.35472	0.0532075	0.0870822
Fraxinus rhynchophylla	Oleaceae	3	79.4333	0.254545	0.083838	0.186112
Sorbus alnifolia	Rosaceae	3	124.438	0.17904	0.05606	0.157829
Primula denticulata	Primulaceae	6	130.382	0.357	0.118	0.028
Primula pseudodenticulata	Primulaceae	6	130.382	0.317	0.096	0.028
Ziziphus attopensis	Rhamnaceae	3	99.1154	0.364667	0.0653333
Panax notoginseng	Araliaceae	5	82.6946	0.0800556	0.0550808	0.0546717
Populus cathayana	Salicaceae	5	106.083	0.263665	0.0525	0.01821
Robinia pseudoacacia	Fabaceae	6	111.456	0.357	0.0765	0.0555
Robinia pseudoacacia	Fabaceae	6	111.456	0.276	0.027	0.059
Lolium perenne	Poaceae	10	94.0834	0.2045	0.0905	0.13
Bagassa guianensis	Moraceae	7	81.4413	0.214286	0.0550556
Cecropia obtusa	Cecropiaceae	8	#N/A	0.413333	0.0796667
Carapa procera	Meliaceae	7	90.9524	0.289524	0.0486111
Tabebuia insignis	Bignoniaceae	7	80.04	0.323175	0.0655
Virola michelii	Myristicaceae	7	135.405	0.19873	0.0346667
Virola surinamensis	Myristicaceae	7	135.405	0.293968	0.0642778
Eperua falcata	Fabaceae	7	111.456	0.200635	0.0435556
Eperua grandiflora	Fabaceae	6	111.456	0.151429	0.0305556
Hymenaea courbaril	Fabaceae	7	111.456	0.288889	0.0686667
Symphonia globulifera	Clusiaceae	7	105.258	0.274286	0.0572222
Amanoa guianensis	Euphorbiaceae	7	96.4903	0.288571	0.0582222
Couepia caryophylloides	Chrysobalanaceae	7	77.2542	0.188571	0.0374444
Licania heteromorpha	Chrysobalanaceae	6	77.2542	0.235238	0.0525556
Vouacapoua americana	Fabaceae	7	111.456	0.149206	0.0281111
Acer rubrum	Sapindaceae	5	105.652	0.371325	0.0785022	0.163276
Fraxinus americana	Oleaceae	5	79.4333	0.320626	0.117423	0.170208
Populus grandidentata	Salicaceae	5	106.083	0.313454	0.0353098	0.1379
Populus tremuloides	Salicaceae	5	106.083	0.379545	0.0720538	0.145639
Panax notoginseng	Araliaceae	3	82.6946	0.15	0.015	0.19
Panax notoginseng	Araliaceae	7	82.6946	0.126503	0.0467281	0.246016
Panax notoginseng	Araliaceae	7	82.6946	0.14845	0.0639	0.24395
Vochysia divergens	Vochysiaceae	5	102.451	0.162	0.0225	0.004
Acer saccharum	Sapindaceae	6	105.652	0.248687	0.049225
Betula alleghaniensis	Betulaceae	6	85.0562	0.237316	0.0461025
Astragalus membranaceus	Fabaceae	3	111.456	0.338291	0.0529573
Hippophae rhamnoides	Elaeagnaceae	3	96.0498	0.326325	0.0510427
Salix phanera	Salicaceae	3	106.083	0.32735	0.0501538
Populus purdomii	Salicaceae	3	106.083	0.296923	0.0471111
Salix rehderiana	Salicaceae	3	106.083	0.292479	0.0464274
Salix magnifica	Salicaceae	3	106.083	0.3	0.0453333
Abies fabri	Pinaceae	3	139.338	0.256752	0.0420513
Picea brachytyla	Pinaceae	3	139.338	0.264615	0.041812
Rhododendron decorum	Ericaceae	3	108.951	0.251795	0.0406496
Carapa grandiflora	Meliaceae	3	90.9524	0.122823	0.024819	0.145869
Cedrela serrata	Meliaceae	3	90.9524	0.143044	0.0295879	0.0786521
Corymbia maculata	Myrtaceae	3	102.451	0.209709	0.0453894	0.0971538
Entandrophragma excelsum	Meliaceae	3	90.9524	0.127877	0.0222159	0.108349
Polyscias fulva	Araliaceae	6	82.6946	0.172192	0.0320024	0.0925487
Podocarpus falcatus	Podocarpaceae	3	#N/A	0.082154	0.0201974	0.0842498
Carapa grandiflora	Meliaceae	3	90.9524	0.11158	0.0322631	0.118528
Entandrophragma excelsum	Meliaceae	3	90.9524	0.124285	0.0285657	0.108226
Hagenia abyssinica	Rosaceae	3	124.438	0.317662	0.0849232	0.0892574
Macaranga kilimandscharica	Euphorbiaceae	3	96.4903	0.182789	0.0510802	0.0871833
Polyscias fulva	Araliaceae	3	82.6946	0.220426	0.0638768	0.0850498
Syzygium guineense	Myrtaceae	3	102.451	0.128423	0.0349897	0.0865664
Betula pendula	Betulaceae	5	85.0562	0.296237	0.109504	0.220362
Solidago virgaurea	Asteraceae	5	76.4654	0.229226	0.090738	0.259292
Tilia cordata	Malvaceae	5	110.033	0.279586	0.122848	0.344439
Datura stramonium	Solanaceae	8	105.937	0.235	0.0945	0.169792
Echium plantagineum	Boraginaceae	8	59.1509	0.184	0.105	0.159207
Eucalyptus goniocalyx	Myrtaceae	8	102.451	0.131	0.07	0.217514
Eucalyptus macrorhyncha	Myrtaceae	8	102.451		0.0655	0.176968
Nerium oleander	Apocynaceae	8	99.5431	0.1745	0.0505	0.17717
Nicotiana tabacum	Solanaceae	8	105.937	0.2065	0.0785	0.191391
Physalis peruviana	Solanaceae	8	105.937	0.2185	0.059	0.186562
Plantago major	Plantaginaceae	8	101.432	0.1895	0.0975	0.157228
Radyera farragei	Malvaceae	8	110.033	0.1615	0.073	0.151699
Raphanus sativus	Brassicaceae	8	52.0003	0.246	0.1245	0.1594
Rumex dentatus	Polygonaceae	3	84.0689	0.4175	0.19
Eupatorium adenophorum	Asteraceae	10	76.4654	0.4	0.07	0.258935
Eupatorium japonicum	Asteraceae	10	76.4654	0.32	0.06	0.238796
Eupatorium adenophorum	Asteraceae	8	76.4654	0.37	0.06	0.08
Eupatorium chinense	Asteraceae	8	76.4654	0.27	0.05	0.25
Eupatorium heterophyllum	Asteraceae	6	76.4654	0.21	0.05	0.15
Peperomia pellucida	Piperaceae	11	95.5406	0.623	0.107	0.196
Peperomia tetraphylla	Piperaceae	6	95.5406	0.125	0.02	0.243
Piper sarmentosum	Piperaceae	11	95.5406	0.233	0.042	0.244
Piper hispidinervum	Piperaceae	11	95.5406	0.426	0.054	0.228
Buddleja davidii	Scrophulariaceae	6	99.4786	0.6	0.095	0.036
Berberis vulgaris	Berberidaceae	6	111.736	0.22	0.055	0.049
Cornus sanguinea	Cornaceae	6	117.598	0.4	0.066	0.056
Sambucus nigra	Viburnaceae	6	#N/A	0.35	0.061	0.032
Betula pendula	Betulaceae	6	85.0562	0.42	0.07	0.036
Crataegus monogyna	Rosaceae	6	124.438	0.26	0.057	0.039
Oxalis corymbosa	Oxalidaceae	11	63.5954	0.737	0.1
Oxalis triangularis	Oxalidaceae	11	63.5954	0.214	0.04
Peperomia pellucida	Piperaceae	11	95.5406	0.702	0.107
Peperomia caperata	Piperaceae	4	95.5406	0.194	0.038
Eucalyptus globulus	Myrtaceae	3	102.451	0.13	0.0422385	0.100784
Acacia mearnsii	Fabaceae	3	111.456	0.0645	0.0280944	0.0313497
Acacia koa	Fabaceae	6	111.456	0.54047	0.0631605	0.112621	0.045742
Dodonaea viscosa	Sapindaceae	6	105.652	0.288889	0.045009	0.244649	0.099433
Osteomeles anthyllidifolia	Rosaceae	6	124.438	0.277859	0.123336	0.183344	0.107705
Pipturus albidus	Urticaceae	3	81.4413	0.307867	0.100102	0.172009	0.106407
Sophora chrysophylla	Fabaceae	6	111.456	0.336902	0.106792	0.175801	0.065693
Falcataria moluccana	Fabaceae	6	111.456	0.541606	0.0698119	0.111809	0.061477
Leucaena leucocephala	Fabaceae	6	111.456	0.430657	0.08953	0.137149	0.060989
Psidium cattleianum	Myrtaceae	6	102.451	0.544688	0.0518119	0.0958296	0.049797
Pyracantha angustifolia	Rosaceae	6	124.438	0.319546	0.114536	0.190259	0.090186
Schinus terebinthifolius	Anacardiaceae	3	84.1202	0.309651	0.0776667	0.152489	0.129278
Medicago sativa	Fabaceae	4	111.456	0.267833	0.0596653	0.158854
Astrebla lappacea	Poaceae	7	94.0834	0.106		0.181783
Astrebla pectinata	Poaceae	7	94.0834	0.041		0.110847
Eragrostis superba	Poaceae	7	94.0834	0.0665		0.150563
Panicum coloratum	Poaceae	7	94.0834	0.0725		0.158799
Panicum decompositum	Poaceae	7	94.0834	0.076		0.18455
Panicum miliaceum	Poaceae	7	94.0834	0.058		0.131674
Panicum virgatum	Poaceae	7	94.0834	0.053		0.172771
Bothriochloa biloba	Poaceae	7	94.0834	0.045		0.249673
Bothriochloa bladhii	Poaceae	7	94.0834	0.053		0.241828
Cenchrus ciliaris	Poaceae	7	94.0834	0.054		0.20761
Dichanthium sericeum	Poaceae	7	94.0834	0.061		0.240116
Paspalum dilatatum	Poaceae	7	94.0834	0.073		0.184718
Paspalum notatum	Poaceae	7	94.0834	0.0785		0.202458
Pennisetum clandestinum	Poaceae	7	94.0834	0.0505		0.179257
Leymus chinensis	Poaceae	9	94.0834	0.108507	0.00960069	0.0295139
Picea abies	Pinaceae	4	139.338	0.0972138	0.0239418	0.0772557
Eucalyptus grandis	Myrtaceae	8	102.451	0.426	0.0626	0.173
Pinus radiata	Pinaceae	6	139.338	0.17211	0.0704773	0.144365
Pinus massoniana	Pinaceae	6	139.338	0.195079	0.0843608	0.121646	0.0810673
Chamaecyparis obtusa	Cupressaceae	12	139.338	0.121112	0.0322916
Pinus densiflora	Pinaceae	3	139.338	0.13072	0.0335498	0.138492
Acacia beckleri	Fabaceae	4	111.456	0.0424544			0.123388
Acacia implexa	Fabaceae	4	111.456	0.0684933			0.209371
Banksia blechnifolia	Proteaceae	4	118.699	0.0904105			0.281484
Banksia serrata	Proteaceae	4	118.699	0.141601			0.180768
Eucalyptus pauciflora	Myrtaceae	4	102.451	0.0769923			0.217768
Eucalyptus radiata	Myrtaceae	4	102.451	0.133207			0.129676
Hakea brownii	Proteaceae	4	118.699	0.11423			0.19517
Hakea salicifolia	Proteaceae	4	118.699	0.126908			0.308605
Hardenbergia comptoniana	Fabaceae	4	111.456	0.11881			0.113082
Hardenbergia violacea	Fabaceae	4	111.456	0.0997909			0.101888
Lasiopetalum discolor	Malvaceae	4	110.033	0.101105			0.190094
Lasiopetalum schulzenii	Malvaceae	4	110.033	0.145585			0.110818
Pomaderris apetala	Rhamnaceae	4	99.1154	0.149716			0.161658
Pomaderris eriocephala	Rhamnaceae	4	99.1154	0.088469			0.162097
Commersonia magniflora	Malvaceae	4	110.033	0.147735			0.224383
Commersonia salviifolia	Malvaceae	4	110.033	0.170317			0.208713
Eucalyptus bridgesiana	Myrtaceae	3	102.451	0.13496			0.147285
Eucalyptus elata	Myrtaceae	3	102.451	0.152982			0.211465
Eucalyptus mannifera	Myrtaceae	3	102.451	0.163668			0.15326
Eucalyptus polyanthemos	Myrtaceae	3	102.451	0.144139			0.22522
Eucalyptus moorei	Myrtaceae	3	102.451	0.12043			0.175516
Eucalyptus pauciflora	Myrtaceae	3	102.451	0.149072			0.197329
Eucalyptus rossii	Myrtaceae	3	102.451	0.159458			0.0719199
Wedelia trilobata	Asteraceae	5	76.4654	0.33	0.07	0.11
Wedelia urticifolia	Asteraceae	5	76.4654	0.23	0.05	0.09
Wedelia chinensis	Asteraceae	5	76.4654	0.21	0.04	0.1
Reynoutria japonica	Polygonaceae	38	84.0689	0.108	0.0807	0.135	0.0947
Reynoutria japonica	Polygonaceae	38	84.0689	0.272	0.0806	0.176	0.0947
Reynoutria japonica	Polygonaceae	38	84.0689	0.332	0.0594	0.133	0.0712
Persicaria thunbergii	Polygonaceae	4	84.0689	0.331			0.067
Xanthium canadense	Asteraceae	4	76.4654	0.267			0.042
Fagopyrum dibotrys	Polygonaceae	4	84.0689	0.203			0.013
Phragmites communis	Poaceae	4	94.0834	0.245			0.054
Pueraria lobata	Fabaceae	4	111.456	0.137			0.028
Reynoutria sachalinensis	Polygonaceae	4	84.0689	0.313			0.06
Rumex obtusifolius	Polygonaceae	4	84.0689	0.301			0.022
Acer japonicum	Sapindaceae	4	105.652	0.138			0.064
Acer mono	Sapindaceae	4	105.652	0.181			0.032
Acer nikoense	Sapindaceae	4	105.652	0.229			0.056
Mallotus japonicus	Euphorbiaceae	4	96.4903	0.164			0.017
Quercus crispula	Fagaceae	4	110.459	0.259			0.037
Quercus serrata	Fagaceae	4	110.459	0.262			0.109
Zanthoxylum ailanthoides	Rutaceae	4	87.7137	0.22			0.023
Hydrangea macrophylla	Hydrangeaceae	4	93.5761	0.252			0.022
Morus australis	Moraceae	4	81.4413	0.246			0.038
Camellia japonica	Theaceae	4	120.552	0.196			0.098
Neolitsea sericea	Lauraceae	4	118.36	0.186			0.089
Phyllostachys bambusoides	Poaceae	4	94.0834	0.213			0.057
Quercus myrsinifolia	Fagaceae	4	110.459	0.132			0.131
Mahonia japonica	Berberidaceae	4	111.736	0.181			0.065
Abies firma	Pinaceae	4	139.338	0.245			0.324
Cryptomeria japonica	Cupressaceae	4	139.338	0.179			0.087
Oryza sativa	Poaceae	3	94.0834	0.371789	0.0992	0.1491	0.041
Larix kaempferi	Pinaceae	5	139.338	0.317167	0.104717	0.2255
Castanopsis sclerophylla	Fagaceae	3	110.459	0.1487			0.0649
Lithocarpus glaber	Fagaceae	3	110.459	0.1431			0.06891
Schima superba	Theaceae	3	120.552	0.1344			0.07352
Castanopsis fargesii	Fagaceae	3	110.459	0.1303			0.07649
Myrica rubra	Myricaceae	3	91.2447	0.1679			0.04836
Loropetalum chinense	Hamamelidaceae	3	114.862	0.1628			0.05691
Symplocos sumuntia	Symplocaceae	3	117.607	0.1507			0.06005
Camellia fraterna	Theaceae	3	120.552	0.1456			0.06299
Oryza sativa	Poaceae	3	94.0834	0.234017		0.185933
Daphniphyllum humile	Daphniphyllaceae	3	102.253	0.184755	0.0373946	0.172991
Daphniphyllum humile	Daphniphyllaceae	5	102.253	0.186678	0.0346581	0.152788
Magnolia hypoleuca	Magnoliaceae	3	118.843	0.193667	0.14	0.176
Quercus mongolica	Fagaceae	3	110.459	0.135333	0.102333	0.188
Prunus ssiori	Rosaceae	3	124.438	0.202667	0.0833333	0.212333
Carpinus cordata	Betulaceae	3	85.0562	0.184667	0.111	0.253667
Pinus sylvestris	Pinaceae	4	139.338	0.0627815		0.117832
Prunus persica	Rosaceae	12	124.438	0.169965	0.0443277	0.121811
Eupatorium adenophorum	Asteraceae	5	76.4654	0.305	0.06	0.11	0.08
Eupatorium japonicum	Asteraceae	5	76.4654	0.22	0.05	0.09	0.13
Populus purdomii	Salicaceae	5	106.083	0.290507			0.109084
Populus purdomii	Salicaceae	5	106.083	0.334529			0.0903296
Populus purdomii	Salicaceae	5	106.083	0.240436			0.143333
Salix magnifica	Salicaceae	5	106.083	0.271238			0.111025
Salix magnifica	Salicaceae	5	106.083	0.292827			0.114102
Salix magnifica	Salicaceae	5	106.083	0.204923			0.154359
Astragalus adsurgens	Fabaceae	4	111.456	0.229598			0.123851
Hippophae rhamnoides	Elaeagnaceae	4	96.0498	0.247989			0.135345
Populus purdomii	Salicaceae	4	106.083	0.346552			0.113506
Salix rehderiana	Salicaceae	4	106.083	0.327586			0.0979885
Betula utilis	Betulaceae	4	85.0562	0.325575			0.102874
Salix magnifica	Salicaceae	4	106.083	0.306609			0.108333
Abies fabri	Pinaceae	4	139.338	0.221839			0.152586
Picea brachytyla	Pinaceae	4	139.338	0.231609			0.168103
Rhododendron decorum	Ericaceae	4	108.951	0.224713			0.175862
Eupatorium adenophorum	Asteraceae	4	76.4654	0.381174			0.0863471
Eupatorium stoechadosmum	Asteraceae	4	76.4654	0.270379			0.105229
Gossypium hirsutum	Malvaceae	8	110.033	0.501079	0.0806364	0.128911
Triticum aestivum	Poaceae	4	94.0834	0.21445	0.0597	0.06005	0.09685
Cypripedium flavum	Orchidaceae	3	138.82	0.363333	0.0742333	0.166033
Brassica napus	Brassicaceae	3	52.0003	0.3995	0.081	0.1535	0.1645
Populus cathayana	Salicaceae	4	106.083	0.2105	0.0595	0.048	0.2045
Ardisia quinquegona	Primulaceae	4	130.382	0.163333	0.0383333	0.07	0.101667
Blastus cochinchinensis	Melastomataceae	4	84.9277	0.143333	0.0633333	0.0683333	0.0783333
Castanea henryi	Fagaceae	4	110.459	0.13	0.0533333	0.055	0.09
Brassica campestris	Brassicaceae	6	52.0003	0.29	0.03	0.26
Ulmus elongata	Ulmaceae	3	101.66	0.285	0.025	0.041
Pisum sativum	Fabaceae	3	111.456	0.270706
Larix gmelinii	Pinaceae	8	139.338	0.4033	0.06025	0.20775
Populus deltoides × Populus nigra	Salicaceae	5	106.083	0.182378	0.0274612	0.0455846
Incarvillea delavayi	Bignoniaceae	3	80.04	0.145198	0.0322034	0.00564972
Magnolia montana	Magnoliaceae	6	118.843	0.111208	0.0214917
Swietenia macrophylla	Meliaceae	6	90.9524	0.187979	0.0334343
Acacia mangium	Fabaceae	6	111.456	0.185772	0.0236179
Zea mays	Poaceae	4	94.0834	0.1275	0.054	0.2505	0.1005
Pinus pumila	Pinaceae	4	139.338	0.2185			0.3865
Laurus nobilis	Lauraceae	2	118.36	0.133974	0.0302015
Olea europaea	Oleaceae	2	79.4333	0.127438	0.0280961
Quercus ilex	Fagaceae	2	110.459	0.139748	0.0358997
Quercus ilex	Fagaceae	6	110.459	0.1403	0.0338667
Quercus suber	Fagaceae	4	110.459	0.1925	0.0369	0.0887302
Betula ermanii	Betulaceae	3	85.0562	0.162179	0.0428384	0.126633
Quercus crispula	Fagaceae	3	110.459	0.148192	0.0403589	0.133745
Acacia auriculiformis	Fabaceae	3	111.456	0.1145	0.0159
Acacia mangium	Fabaceae	3	111.456	0.1707	0.025
Eucalyptus camaldulensis	Myrtaceae	3	102.451	0.2676	0.0389
Eucalyptus globulus	Myrtaceae	3	102.451	0.7553	0.0973
Eucalyptus grandis	Myrtaceae	3	102.451	0.6049	0.0789
Eucalyptus urophylla	Myrtaceae	3	102.451	0.5639	0.0745
Polygonum cuspidatum	Polygonaceae	3	84.0689	0.216667			0.0673333
Glycine max	Fabaceae	6	111.456	0.258667
Solanum tuberosum	Solanaceae	6	105.937	0.256
Triticum aestivum	Poaceae	6	94.0834	0.179333
Zea mays	Poaceae	6	94.0834	0.0553333
Fagus sylvatica	Fagaceae	5	110.459	0.323823	0.0663205
Cornus controversa	Cornaceae	4	117.598	0.105667	0.0453333	0.292667	0.0593333
Robinia pseudoacacia	Fabaceae	6	111.456	0.115	0.0473333	0.163	0.236
Pinus radiata	Pinaceae	6	139.338	0.114678
Spartina alterniflora	Poaceae	15	94.0834	0.11555			0.053075
Populus × canadensis	Salicaceae	6	106.083	0.218862	0.0302354	0.0855379
Pseudotsuga menziesii	Pinaceae	8	139.338	0.126034	0.0348855	0.128079
Abies alba	Pinaceae	30	139.338	0.11435	0.0248889	0.069808
Arctagrostis latifolia	Poaceae	13	94.0834	0.247024	0.143526
Dupontia fisheri	Poaceae	8	94.0834	0.218056	0.12838
Arctophila fulva	Poaceae	26	94.0834	0.335714	0.190124
Carex aquatilis	Cyperaceae	36	85.5398	0.164683	0.095218
Eriophorum angustifolium	Cyperaceae	43	85.5398	0.125397	0.0803432
Petasites frigidus	Asteraceae	44	76.4654	0.141667	0.0806186
Salix pulchra	Salicaceae	9	106.083	0.141071	0.0764549
Triticum aestivum	Poaceae	5	94.0834	0.146115
Chenopodium album	Amaranthaceae	5	90.0882	0.255	0.112548	0.184598
Solanum tuberosum	Solanaceae	3	105.937	0.259	0.0772576	0.145
Solanum melongena	Solanaceae	3	105.937	0.201		0.159345
Brassica oleracea	Brassicaceae	4	52.0003	0.158	0.091706	0.1079
Odontarrhena muralis	Brassicaceae	4	52.0003	0.48	0.064	0.33
Odontarrhena moravensis	Brassicaceae	4	52.0003	0.54	0.106	0.17
Odontarrhena chalcidica	Brassicaceae	4	52.0003	0.46	0.077	0.16
Oryza sativa	Poaceae	3	94.0834	0.154817	0.032039	0.137647
Populus deltoides	Salicaceae	3	106.083	0.302737	0.0358343	0.151615	0.142863
Eucalyptus globulus	Myrtaceae	3	102.451	0.135474	0.0671556	0.192878
Fagus crenata	Fagaceae	3	110.459	0.227517	0.0482392	0.163798
Fagus crenata	Fagaceae	3	110.459	0.147677	0.0287187	0.0986594
Fagus crenata	Fagaceae	3	110.459	0.18598	0.0372529	0.117162
Citrus grandis	Rutaceae	3	87.7137	0.0729333	0.00726667	0.025
Woonyoungia septentrionalis	Magnoliaceae	5	118.843	0.293	0.041	0.052
Tsoongiodendron lotungensis	Magnoliaceae	5	118.843	0.181	0.022	0.041
Triticum aestivum	Poaceae	6	94.0834	0.458846	0.0540227	0.132217
Helianthus annuus	Asteraceae	6	76.4654	0.618996	0.0853536	0.165694
Oryza sativa	Poaceae	4	94.0834	0.296893
Eucalyptus globulus	Myrtaceae	3	102.451	0.23999
Quercus acuta	Fagaceae	3	110.459	0.167692	0.047864	0.089059	0.182
Quercus glauca	Fagaceae	3	110.459	0.162393	0.044957	0.084787	0.179
Quercus serrata	Fagaceae	3	110.459	0.236923	0.064274	0.110427	0.085
Quercus crispula	Fagaceae	3	110.459	0.21094	0.069402	0.107179	0.076
Ormosia fordiana	Fabaceae	5	111.456	0.099	0.024	0.013	0.24
Pithecellobium clypearia	Fabaceae	5	111.456	0.12	0.026	0.015	0.15
Pithecellobium lucidum	Fabaceae	5	111.456	0.12	0.027	0.016	0.09
Ormosia semicastrata	Fabaceae	5	111.456	0.16	0.034	0.018	0.23
Ormosia balansae	Fabaceae	5	111.456	0.12	0.025	0.016	0.3
Lithocarpus fenzelianus	Fagaceae	5	110.459	0.15	0.031	0.015	0.28
Castanopsis hystrix	Fagaceae	5	110.459	0.2	0.041	0.014	0.46
Castanopsis fissa	Fagaceae	5	110.459	0.14	0.029	0.016	0.13
Cyclobalanopsis phanera	Fagaceae	5	110.459	0.2	0.047	0.017	0.29
Cyclobalanopsis patelliformis	Fagaceae	5	110.459	0.19	0.034	0.018	0.37
Dalbergia odorifera	Fabaceae	7	111.456	0.13	0.03	0.1	0.07
Erythrophleum fordii	Fabaceae	7	111.456	0.16	0.04	0.06	0.05
Castanopsis hystrix	Fagaceae	7	110.459	0.3	0.07	0.07	0.27
Betula alnoides	Betulaceae	7	85.0562	0.26	0.07	0.12	0.22
Dalbergia odorifera	Fabaceae	7	111.456	0.192667	0.0436667	0.14	0.0653333
Erythrophleum fordii	Fabaceae	7	111.456	0.211667	0.0496667	0.113	0.043
Castanopsis hystrix	Fagaceae	7	110.459	0.26	0.057	0.122	0.350667
Betula alnoides	Betulaceae	7	85.0562	0.302	0.0726667	0.137	0.189333
Amaranthus cruentus	Amaranthaceae	3	90.0882	0.0953333
Rhododendron decorum	Ericaceae	5	108.951	0.22	0.06	0.0484708
Rhododendron yunnanense	Ericaceae	5	108.951	0.31	0.08	0.0776445
Rhododendron rubiginosum	Ericaceae	5	108.951	0.24	0.06	0.048012
Pinus taeda	Pinaceae	6	139.338	0.0300667		0.0508431
Quercus mongolica	Fagaceae	5	110.459	0.31	0.052
Acer mono	Sapindaceae	5	105.652	0.35	0.07
Cucumis sativus	Cucurbitaceae	4	112.852	0.4225	0.082	0.2525
Eucalyptus globulus	Myrtaceae	3	102.451	0.163667	0.0386507	0.151889
Betula nana	Betulaceae	8	85.0562	0.196497	0.0528187	0.0844849
Eriophorum vaginatum	Cyperaceae	8	85.5398	0.0969207	0.0359713	0.0797649
Prunus persica	Rosaceae	10	124.438	0.0887518	0.0747796
Picea glauca	Pinaceae	4	139.338	0.1196	0.0371	0.0274
Picea mariana	Pinaceae	4	139.338	0.0383	0.0123	0.0166
Picea likiangensis	Pinaceae	4	139.338	0.0565	0.0166	0.0216
Picea koraiensis	Pinaceae	4	139.338	0.0368	0.01	0.0101
Picea crassifolia	Pinaceae	4	139.338	0.0164	0.0085	0.0074
Pinus elliottii	Pinaceae	3	139.338	0.261278	0.0546871	0.0721018
Pinus massoniana	Pinaceae	3	139.338	0.256261	0.0551591	0.0688676
Eupatorium adenophorum	Asteraceae	3	76.4654	0.166			0.146
Eupatorium japonicum	Asteraceae	3	76.4654	0.187			0.108
Glycine max	Fabaceae	12	111.456	0.518515	0.0696398	0.0399472
Gossypium hirsutum	Malvaceae	12	110.033	0.480343	0.0589542	0.0454511
Eucalyptus globulus	Myrtaceae	5	102.451	0.42	0.128412
Pinus pinaster	Pinaceae	3	139.338	0.179002		0.130596
Eucalyptus delegatensis	Myrtaceae	6	102.451	0.43	0.137061	0.106523
Eucalyptus nitens	Myrtaceae	6	102.451	0.42	0.156223	0.121025
Eucalyptus regnans	Myrtaceae	6	102.451	0.39	0.156472	0.111325
Eucalyptus globulus	Myrtaceae	6	102.451	0.48	0.164113	0.140273
Eucalyptus viminalis	Myrtaceae	6	102.451	0.36	0.105597	0.0898964
Eucalyptus arenacea	Myrtaceae	6	102.451	0.41	0.144603	0.118796
Eucalyptus dumosa	Myrtaceae	6	102.451	0.32	0.105436	0.0930233
Eucalyptus hypochlamydea	Myrtaceae	6	102.451	0.34	0.112503	0.108788
Eucalyptus socialis	Myrtaceae	6	102.451	0.4	0.0895521	0.0911314
Begonia grandis	Begoniaceae	3	90.3251	0.0775		0.14
Hakea prostrata	Proteaceae	3	118.699	0.20675		0.11
Viminaria juncea	Fabaceae	3	111.456	0.10275		0.1375
Eucalyptus torquata	Myrtaceae	3	102.451	0.085		0.09
Kennedia rubicunda	Fabaceae	3	111.456	0.048		0.15
Banksia aemula	Proteaceae	3	118.699	0.117		0.19
Hibbertia scandens	Dilleniaceae	3	149.001	0.266		0.22
Elaeocarpus decipiens	Elaeocarpaceae	3	90.6534	0.212		0.36
Corymbia calophylla	Myrtaceae	3	102.451	0.093		0.28
Eucalyptus camaldulensis	Myrtaceae	3	102.451	0.24		0.21
Eucalyptus diversicolor	Myrtaceae	3	102.451	0.20125
Pinus sylvestris	Pinaceae	6	139.338	0.301667	0.0236749	0.0928794
Eucalyptus badjensis	Myrtaceae	3	102.451	0.187	0.0482828	0.0944172
Eucalyptus benthamii var. benthamii	Myrtaceae	3	102.451	0.3237	0.0523989	0.105001
Eucalyptus bosistoana	Myrtaceae	3	102.451	0.1817	0.0541516	0.107248
Eucalyptus botryoides	Myrtaceae	3	102.451	0.1758	0.0525405	0.0918595
Eucalyptus brookeriana	Myrtaceae	3	102.451	0.22	0.052804	0.101296
Eucalyptus cameronii	Myrtaceae	3	102.451	0.1383	0.0635167	0.103683
Eucalyptus cypellocarpa	Myrtaceae	3	102.451	0.2393	0.0537874	0.111913
Eucalyptus delegatensis	Myrtaceae	3	102.451	0.1527	0.0425218	0.0793782
Eucalyptus dendromorpha	Myrtaceae	3	102.451	0.1751	0.0428911	0.0819089
Eucalyptus dunnii	Myrtaceae	3	102.451	0.2437	0.049829	0.091771
Eucalyptus elata	Myrtaceae	3	102.451	0.24005	0.0615629	0.112137
Eucalyptus fastigata	Myrtaceae	3	102.451	0.252	0.0544242	0.105076
Eucalyptus fraxinoides	Myrtaceae	3	102.451	0.2561	0.044381	0.090919
Eucalyptus globulus	Myrtaceae	3	102.451	0.185	0.0510202	0.0962798
Eucalyptus grandis	Myrtaceae	3	102.451	0.3202	0.0518153	0.0971847
Eucalyptus melliodora	Myrtaceae	3	102.451	0.2252	0.0479261	0.0904739
Eucalyptus muelleriana	Myrtaceae	3	102.451	0.359	0.0644499	0.11765
Eucalyptus nitens	Myrtaceae	3	102.451	0.1119	0.0428316	0.0804684
Eucalyptus obliqua	Myrtaceae	3	102.451	0.191667	0.0473006	0.0918328
Eucalyptus oreades	Myrtaceae	3	102.451	0.2105	0.0518398	0.0977602
Eucalyptus paniculata	Myrtaceae	3	102.451	0.1826	0.0630952	0.121305
Eucalyptus quadrangulata	Myrtaceae	3	102.451	0.1859	0.0580403	0.11136
Eucalyptus regnans	Myrtaceae	3	102.451	0.1519	0.0512343	0.0995657
Eucalyptus saligna	Myrtaceae	3	102.451	0.246667	0.0533867	0.100413
Eucalyptus sieberi	Myrtaceae	3	102.451	0.3417	0.0468393	0.0881607
Eucalyptus smithii	Myrtaceae	3	102.451	0.2865	0.0610679	0.117532
Eucalyptus tereticornis	Myrtaceae	3	102.451	0.2163	0.0371518	0.0737482
Eucalyptus triflora	Myrtaceae	3	102.451	0.0942	0.0427329	0.0847671
Eucalyptus viminalis	Myrtaceae	3	102.451	0.2228	0.0517979	0.0896021
Eucalyptus badjensis	Myrtaceae	3	102.451	0.1527	0.0338583	0.0664417
Eucalyptus benthamii var. benthamii	Myrtaceae	3	102.451	0.2678	0.0417947	0.0814053
Eucalyptus bosistoana	Myrtaceae	3	102.451	0.266	0.0404754	0.0790246
Eucalyptus botryoides	Myrtaceae	3	102.451	0.1417	0.04347	0.08513
Eucalyptus brookeriana	Myrtaceae	3	102.451	0.2203	0.033461	0.067939
Eucalyptus cameronii	Myrtaceae	3	102.451	0.127	0.0498993	0.0931007
Eucalyptus cypellocarpa	Myrtaceae	3	102.451	0.0979	0.0427581	0.0794419
Eucalyptus delegatensis	Myrtaceae	3	102.451	0.167	0.0374953	0.0717047
Eucalyptus dendromorpha	Myrtaceae	3	102.451	0.2615	0.0398195	0.0778805
Eucalyptus dunnii	Myrtaceae	3	102.451	0.2533	0.0435534	0.0898466
Eucalyptus elata	Myrtaceae	3	102.451	0.18515	0.041639	0.081661
Eucalyptus fastigata	Myrtaceae	3	102.451	0.3589	0.0435037	0.0847963
Eucalyptus fraxinoides	Myrtaceae	3	102.451	0.1689	0.038118	0.072882
Eucalyptus globulus	Myrtaceae	3	102.451	0.1987	0.0452456	0.0873544
Eucalyptus grandis	Myrtaceae	3	102.451	0.3094	0.0465054	0.0900946
Eucalyptus melliodora	Myrtaceae	3	102.451	0.2243	0.0296504	0.0590496
Eucalyptus muelleriana	Myrtaceae	3	102.451	0.1518	0.0427706	0.0840294
Eucalyptus nitens	Myrtaceae	3	102.451	0.1624	0.0299316	0.0559684
Eucalyptus obliqua	Myrtaceae	3	102.451	0.189267	0.0381455	0.0745211
Eucalyptus oreades	Myrtaceae	3	102.451	0.1719	0.0385861	0.0743139
Eucalyptus quadrangulata	Myrtaceae	3	102.451	0.1413	0.0333381	0.0680619
Eucalyptus regnans	Myrtaceae	3	102.451	0.1777	0.0448194	0.0885806
Eucalyptus saligna	Myrtaceae	3	102.451	0.2336	0.0483086	0.0872914
Eucalyptus sieberi	Myrtaceae	3	102.451	0.1676	0.0319849	0.0630151
Eucalyptus smithii	Myrtaceae	3	102.451	0.2346	0.0460894	0.0859106
Eucalyptus tereticornis	Myrtaceae	3	102.451	0.1896	0.0342805	0.0643195
Eucalyptus viminalis	Myrtaceae	3	102.451	0.2173	0.0427501	0.0826999
Pseudotsuga menziesii	Pinaceae	8	139.338	0.165		0.116468
Leymus chinensis	Poaceae	6	94.0834	0.1382	0.04	0.1736	0.0929
Poa fawcettiae	Poaceae	8	94.0834	0.28121	0.054398	0.125392
Poa costiniana	Poaceae	8	94.0834	0.22908	0.05478	0.13114
Poa alpina	Poaceae	8	94.0834	0.167826	0.050213	0.118961
Poa pratensis	Poaceae	8	94.0834	0.277728	0.07656	0.173712
Poa compressa	Poaceae	8	94.0834	0.23571	0.08439	0.1649
Poa trivialis	Poaceae	8	94.0834	0.256372	0.058636	0.11342
Poa annua	Poaceae	8	94.0834	0.278208	0.085491	0.119301
Acer rubrum	Sapindaceae	5	105.652	0.167436
Quercus alba	Fagaceae	5	110.459	0.173909
Populus × canadensis	Salicaceae	30	106.083	0.0768	0.0283	0.0631	0.426532
Betula utilis	Betulaceae	7	85.0562	0.24375	0.04	0.00925	0.3747
Hippophae rhamnoides	Elaeagnaceae	30	96.0498	0.1375	0.02875	0.04125	0.1175
Camellia oleifera	Theaceae	5	120.552	0.200667	0.0506667	0.231	0.0673333
Lophatherum gracile	Poaceae	8	94.0834	0.0861538	0.0131027	0.0800623	0.0683128
Lophatherum gracile	Poaceae	8	94.0834	0.0895726	0.0129979	0.0937072	0.0854321
Lophatherum gracile	Poaceae	8	94.0834	0.126496	0.0163522	0.0903427	0.0887243
Alpinia chinensis	Zingiberaceae	8	78.2039	0.253333	0.0311321	0.148723	0.0793416
Alpinia chinensis	Zingiberaceae	8	78.2039	0.136068	0.0168763	0.0902181	0.103868
Alpinia chinensis	Zingiberaceae	8	78.2039	0.155897	0.0207547	0.0874143	0.10535
Ardisia quinquegona	Primulaceae	8	130.382	0.211624	0.0528302	0.113271	0.100247
Ardisia quinquegona	Primulaceae	8	130.382	0.135726	0.0168763	0.0854206	0.131029
Ardisia quinquegona	Primulaceae	8	130.382	0.116923	0.0148847	0.103115	0.125926
Psychotria rubra	Rubiaceae	8	111.501	0.246154	0.0356394	0.100312	0.111276
Psychotria rubra	Rubiaceae	8	111.501	0.119658	0.0171908	0.0879751	0.143704
Psychotria rubra	Rubiaceae	8	111.501	0.133333	0.0215933	0.0976324	0.147984
Diospyros morrisiana	Ebenaceae	8	123.573	0.218462	0.0265199	0.107726	0.10321
Diospyros morrisiana	Ebenaceae	8	123.573	0.191111	0.0283019	0.0841745	0.14535
Diospyros morrisiana	Ebenaceae	8	123.573	0.160342	0.0235849	0.078567	0.139918
Cratoxylum cochinchinense	Hypericaceae	8	81.214	0.282393	0.0403564	0.0923988	0.107325
Cratoxylum cochinchinense	Hypericaceae	8	81.214	0.19453	0.0325996	0.0711526	0.138107
Cratoxylum cochinchinense	Hypericaceae	8	81.214	0.182222	0.0263103	0.0601869	0.136296
Engelhardtia roxburghiana	Juglandaceae	8	91.2447	0.123077	0.0227463	0.0710903	0.165926
Engelhardtia roxburghiana	Juglandaceae	8	91.2447	0.231453	0.0359539	0.102492	0.138107
Engelhardtia roxburghiana	Juglandaceae	8	91.2447	0.22906	0.0377358	0.125607	0.121481
Schima superba	Theaceae	8	120.552	0.228034	0.0334382	0.0758255	0.177284
Schima superba	Theaceae	8	120.552	0.277265	0.0422432	0.105047	0.140412
Schima superba	Theaceae	8	120.552	0.234188	0.0539832	0.111963	0.130535
Carya illinoinensis	Juglandaceae	3	91.2447	0.226959	0.0190669	0.0821364
Oryza sativa	Poaceae	4	94.0834	0.404	0.0726667	0.079
Gossypium hirsutum	Malvaceae	3	110.033	0.338602	0.0428771	0.0240597
Gossypium hirsutum	Malvaceae	40	110.033	0.23375	0.030625	0.0236105
Lindera umbellata	Lauraceae	5	118.36	0.137043		0.196358	0.0727891
Schima superba	Theaceae	3	120.552	0.135101	0.018434	0.183081	0.111111
Castanopsis carlesii	Fagaceae	3	110.459	0.094697	0.017172	0.119949	0.352273
Triticum aestivum	Poaceae	3	94.0834	0.322861			0.0216575
Panax notoginseng	Araliaceae	7	82.6946	0.11136	0.0476316	0.117099
Mikania micrantha	Asteraceae	6	76.4654	0.1775	0.0976	0.0498333
Chromolaena odorata	Asteraceae	6	76.4654	0.105	0.0847111	0.0455556
Artemisia vestita	Asteraceae	5	76.4654	0.0847465	0.0260864	0.0138596	0.337739
Cotinus szechuanensis	Anacardiaceae	5	84.1202	0.220468	0.0445925	0.0273392	0.257471
Sophora davidii	Fabaceae	5	111.456	0.211501	0.0384568	0.0365887	0.159962
Ficus subulata	Moraceae	3	81.4413	0.204043	0.0286954	0.0936507
Ficus tinctoria	Moraceae	3	81.4413	0.217783	0.0361111	0.0890625
Acacia auriculiformis	Fabaceae	3	111.456	0.187333	0.0273333	0.158667
Torreya grandis	Taxaceae	3	#N/A	0.0513333	0.0153333	0.039
Eupatorium adenophorum	Asteraceae	5	76.4654	0.250243	0.0758616	0.178061
Eupatorium heterophyllum	Asteraceae	5	76.4654	0.234093	0.0692959	0.156153
Eupatorium japonicum	Asteraceae	5	76.4654	0.221756	0.0660996	0.158853
Oryza sativa	Poaceae	4	94.0834	0.33075	0.07925	0.2045	0.046875
Karelinia caspia	Asteraceae	8	76.4654	0.23	0.04	0.1
Peganum harmala	Nitrariaceae	8	89.0146	0.11	0.03	0.17
Alhagi sparsifolia	Fabaceae	8	111.456	0.07	0.03	0.28
Pinus elliottii	Pinaceae	6	139.338	0.336621	0.0460039	0.102458
Schima superba	Theaceae	6	120.552	0.295085	0.0434048	0.0209091
Hagenia abyssinica	Rosaceae	7	124.438	0.474385	0.119564	0.157809
Harungana montana	Hypericaceae	7	81.214	0.181617	0.0615568	0.24793
Macaranga kilimandscharica	Euphorbiaceae	7	96.4903	0.169458	0.044591	0.15954
Polyscias fulva	Araliaceae	7	82.6946	0.223812	0.0539844	0.138952
Prunus africana	Rosaceae	7	124.438	0.229241	0.041248	0.239757
Carapa grandiflora	Meliaceae	7	90.9524	0.125588	0.0258929	0.298212
Cleistanthus polystachyus	Phyllanthaceae	7	106.574	0.141952	0.0401051	0.298173
Faurea saligna	Proteaceae	7	118.699	0.22583		0.25917
Ficalhoa laurifolia	Sladeniaceae	7	113.474	0.20754		0.248393
Ocotea kenyensis	Lauraceae	7	118.36	0.131537	0.0295482	0.130189
Strombosia scheffleri	Olacaceae	7	132.193	0.0725973	0.0258364	0.270541
Syzygium guineense	Myrtaceae	7	102.451	0.118174	0.0281127	0.196176
Torreya grandis	Taxaceae	4	#N/A	0.1025	0.0235	0.0235
Musa paradisiaca	Musaceae	3	92.576	0.295	0.011	0.198
Artemisia ordosica	Asteraceae	5	76.4654	0.2	0.06	0.04
Karelinia caspia	Asteraceae	3	76.4654	0.23	0.04	0.16
Tamarix ramosissima	Tamaricaceae	3	66.8724	0.11	0.03	0.2
Alhagi sparsifolia	Fabaceae	3	111.456	0.07	0.03	0.29
Brassica napus	Brassicaceae	6	52.0003	0.284267			0.125556
Helianthus annuus	Asteraceae	3	76.4654	0.29	0.04	0.29	0.16
Brassica napus	Brassicaceae	13	52.0003	0.158232	0.07861	0.191296	0.0538462
Glycine max	Fabaceae	3	111.456	0.215967	0.0424333	0.1251	0.1278
Brassica campestris	Brassicaceae	3	52.0003	0.239	0.0368	0.119	0.1088

## Sheet: Figure 3
Figgure 3a								Figure 3b-e
PR	PB	PL	Pcw	SLA	PNUE	Asat		Herb
0.269402	0.0533772	0.110996		76.365	8.1786	10.36		PR	PB	PL	Pcw	P-other
0.1	0.03	0.23		81.3008	4.56897	10.6		0.227	0.066	0.149	0.083	0.475
0.11	0.04	0.25		75.188	4.85106	11.4
0.11	0.03	0.09		107.527	6.46226	13.7		Woody
0.08	0.03	0.24		60.6061	4.68571	8.2		PR	PB	PL	Pcw	P-other
0.2	0.03			61.3497	7.63889	11		0.175	0.044	0.156	0.144	0.481
0.04		0.29		50.2513	2.25532	5.3
0.09	0.03	0.17		62.8931	2.47525	5		Woody-AM
0.09	0.03	0.18		81.3008	4.58716	10		PR	PB	PL	Pcw	P-other
0.07		0.25		66.2252	2.07447	3.9		0.15	0.039	0.184	0.112	0.515
0.11	0.04	0.34		133.333	5.64444	12.7
0.16	0.03			63.2911	5.48148	14.8		Woody-EcM
0.14	0.04			87.7193	7.87879	13		PR	PB	PL	Pcw	P-other
0.04		0.12		64.1026	2.17899	5.6		0.194	0.051	0.101	0.186	0.468
0.05	0.02			74.6269	1.80124	2.9
0.13	0.03	0.17		83.3333	8	13.6
0.11	0.03	0.16		85.4701	6.83333	12.3
	0.06	0.17		55.2486	10.2151	19
0.06	0.02	0.19		97.0874	3.52941	7.2
0.07	0.03	0.2		84.0336	3.55805	9.5
0.07	0.02	0.29		80.6452	2.9771	3.9
0.1	0.03	0.17		104.167	4.89691	9.5
0.12		0.19		46.9484	5.9375	9.5
0.13	0.04	0.21		61.3497	6.51639	15.9
0.06	0.02			49.505	3.34471	9.8
0.08		0.21		114.943	2.25806	4.2
0.06	0.02	0.2		46.5116	3.08642	7.5
0.05	0.02	0.32		70.922	2.14286	5.4
0.12	0.04	0.22		46.5116	7.41117	14.6
0.14	0.03	0.25		44.0529	8.45745	15.9
0.09				52.6316	2.30435	5.3
0.07				69.9301	0.616883	1.9
0.08	0.02			58.1395	2.36111	6.8
	0.03			123.457		8.7
0.07	0.02			74.6269	3.20312	8.2
0.14	0.05	0.26		50	3.45098	8.8
0.14	0.05			78.125	3.9781	10.9
0.13	0.05	0.14		56.4972	5.02304	10.9
0.12	0.03			88.4956	2.6383	6.2
0.12	0.04	0.28		89.2857	7.28723	13.7
0.12	0.04	0.28		69.9301	2.24	2.8
0.06		0.21		53.1915	1.5625	3.5
0.11	0.03	0.25			5.73171	9.4
0.05	0.02	0.16		81.3008	2.49027	6.4
0.04		0.26		64.1026	1.69014	3.6
0.08	0.02	0.29		111.111	3.00518	5.8
0.15	0.03			76.9231	7.00855	16.4
0.1	0.02	0.24		80.6452	5.81633	11.4
0.03	0.01	0.16		66.2252	2.02797	2.9
0.09	0.03	0.26		102.041	1.66667	2.6
0.09	0.02	0.15		106.383	3.96552	11.5
0.09	0.03	0.23		97.0874	2.33333	5.6
0.11	0.04			70.4225	4.03101	10.4
0.08	0.03	0.14		80	3.04598	5.3
0.16	0.04	0.37		87.7193	11.3333	10.2
0.05	0.02	0.2		89.2857	3.13808	7.5
0.16	0.03	0.2		89.2857	5.18797	13.8
0.1	0.02			76.9231	5.73913	13.2
0.15	0.05	0.12		74.0741	5.55556	13.5
0.08	0.03			125	3.12977	8.2
0.09	0.03			82.6446	4.56621	10
0.15	0.05	0.17		92.5926	7.48792	15.5
0.1	0.04	0.36		60.241	4.78992	5.7
0.07		0.15		95.2381	1.31818	2.9
0.11	0.04	0.17		105.263	3.39181	5.8
0.12	0.03			71.4286	6.83544	16.2
0.06	0.01	0.15		64.9351	2.74627	9.2
0.06	0.02			85.4701	2.27848	5.4
0.08	0.02	0.19		89.2857	5.01661	15.1
0.1	0.03	0.32		49.2611	5.92857	8.3
0.1	0.03	0.24		68.0272	6.10778	10.2
0.06		0.18		71.9424	1.31579	3.5
0.14	0.05	0.16		105.263	3.81188	7.7
0.12	0.02			128.205	4.88479	10.6
0.12	0.04	0.34		64.9351	6.78571	7.6
0.07	0.03	0.31		76.3359	1.16751	2.3
0.15	0.03			78.7402	7.39796	14.5
0.11		0.1		102.041	1.71315	4.3
0.16		0.12		96.1538	4.23256	9.1
0.04	0.01	0.14		48.0769		10.2
0.09		0.19		86.2069	3.18725	8
0.06	0.02	0.14		91.7431		11.9
0.11	0.03	0.17		43.4783	7.01657	12.7
0.13	0.03	0.2		64.5161	6.20879	11.3
0.12	0.03	0.16		135.135	6.44172	10.5
0.14	0.05	0.24		71.9424	6.28931	10
0.12	0.04	0.27		74.0741	5.75	6.9
0.05	0.01	0.11		64.5161	3.50195	9
0.15	0.06	0.32		75.188	6.60194	6.8
0.07	0.02	0.18		113.636	4.93333	11.1
	0.02			81.3008		11.7
0.08	0.02	0.21		158.73	3.57843	7.3
0.05		0.15		61.3497	1.73184	3.1
0.09	0.02	0.16		47.619	5.72491	15.4
0.14	0.04	0.4		57.4713	7.58065	9.4
0.07	0.02	0.28		79.3651	5.53957	7.7
		0.27		95.2381
		0.31		86.9565
0.06		0.43		80.6452	1.60494	3.9
0.14				51.0204	3.72014	10.9
0.22	0.07	0.18		64.1026	7.06587	11.8
0.07	0.02				1.63158	3.1
0.1		0.39		78.7402	3.30275	7.2
0.1				80	2.14545	5.9
0.12	0.03			67.5676	5.24229	11.9
0.15	0.04	0.2		70.922	3.84937	9.2
0.04	0.02	0.25		86.9565	1.59236	2.5
0.08	0.03	0.15		86.9565	3.41969	6.6
0.03		0.12		68.0272	1.20482	2
0.04		0.12		53.1915	1.52838	3.5
0.06	0.02	0.05		50.2513	3.57639	10.3
0.09	0.04	0.18		78.7402	5.40323	13.4
0.13	0.03	0.3		87.7193	6.92857	9.7
0.07	0.03	0.24		90.9091	2.82209	4.6
0.13	0.05			60.241	3.71179	8.5
0.04	0.01	0.19		81.9672	1.75097	4.5
0.04	0.01	0.19		70.922	2.59136	7.8
0.07		0.19		72.9927	2.04225	2.9
0.08	0.03	0.17		85.4701	3.44186	7.4
0.03		0.26		57.4713	1.93939	3.2
0.12				68.4932
0.11				46.9484	2.92576	6.7
0.15	0.05	0.17		59.1716	3.44681	8.1
0.03				84.0336	1.19048	4
0.09	0.01			69.4444	2.81938	6.4
0.04		0.3		67.1141	1.62055	4.1
0.12	0.04	0.47		84.7458	6.21118	10
0.03		0.31		107.527	1.45299	3.4
0.14	0.05	0.26		100	6.26866	12.6
0.16	0.03			63.2911	6.71429	14.1
0.08	0.03	0.23		105.263	4.68571	8.2
0.08	0.02			88.4956	4.16667	9.5
0.09	0.03	0.34		90.0901	3.23232	6.4
0.13				61.3497	1.53846	2.6
0.04		0.16		57.1429	2.3	4.6
0.11	0.03	0.29		67.1141	7.37968	13.8
0.07	0.02	0.21		72.9927	4.05594	11.6
0.07		0.41		82.6446	3.67347	5.4
0.07	0.03	0.37		81.3008	3.69369	4.1
0.09	0.02			65.7895	2.40876	6.6
0.1		0.16		58.8235	5	9.1
0.08	0.02	0.28		88.4956	2.01954	6.2
0.06				60.9756	1.48472	3.4
0.14	0.04			97.0874	4.27673	6.8
0.11	0.03	0.2		105.263	6.22047	15.8
0.13	0.03	0.2		72.9927
0.15	0.04	0.27		89.2857	8.84817	16.9
0.14	0.04	0.16		81.9672	5.30612	10.4
0.13	0.02	0.21		62.5	8.15385	15.9
0.11	0.02			64.9351	6.22807	14.2
0.15	0.04	0.27		185.185	8.58025	13.9
0.04	0.02	0.18		101.01	2.10909	5.8
0.07		0.16		44.4444	1.74603	3.3
0.08	0.02			135.135	3.7963	8.2
0.06		0.27		99.0099	2.75281	4.9
0.05		0.32		61.7284	0.757576	1
0.08	0.02	0.27		76.9231	4.79798	9.5
0.06	0.02	0.19		86.2069	2.22689	5.3
0.1	0.03			80	3.31707	6.8
0.12	0.03			99.0099	4.97512	10
0.08	0.03	0.24			4.07563	9.7
0.07	0.03	0.28		57.4713	1.73077	2.7
0.1	0.04	0.17		91.7431	4.2132	8.3
0.07	0.03	0.35		104.167	3.22222	8.7
0.1	0.03	0.31		41.3223	2.66667	5.2
0.06				85.4701	2.41259	6.9
0.14	0.04	0.25		42.735	6.08696	9.8
0.1		0.16		66.2252	3.04965	8.6
0.13	0.03			57.8035	6.75676	10
0.07	0.03			161.29	4.04372	7.4
0.07	0.02			64.9351	2.8972	6.2
0.17	0.05	0.42		76.9231	6.72414	7.8
0.05	0.02	0.17		55.8659	0.553506	1.5
0.09	0.02	0.32		70.922	6.25698	11.2
0.12	0.05	0.29		51.8135	5.08197	6.2
0.13	0.05	0.36		75.7576	6.16162	6.1
0.14	0.05	0.23		80	5.68306	10.4
0.07	0.02	0.07		84.0336	3.14286	5.5
0.09	0.03	0.41		86.2069	5	5.9
0.11		0.17			7.00535	13.1
0.06	0.02	0.17			1.81818	4
0.04	0.02	0.22		113.895	0.861423	2.3
0.09	0.03	0.16		109.745	4.46809	8.4
0.15	0.03			53.9142	5.60976	11.5
0.12	0.04	0.37		49.456	7.89916	9.4
0.05	0.02	0.24		46.7792		5.6
0.09	0.04	0.47		147.189	1.88889	1.7
0.12	0.04	0.37		130.056	5.77586	6.7
0.06	0.02			140.667	3.01325	9.1
0.07	0.02			103.693	3.92857	9.9
0.09	0.02			94.2285	1.65625	5.3
0.07	0.02	0.16		85.8192	2.97189	7.4
0.1		0.21		124.911	2.48945	5.9
0.06		0.23		110.901	1.77419	4.4
0.06	0.02	0.12		278.009	3.21101	7
0.11	0.04	0.27		260.349	6.84211	6.5
0.02		0.34		40.2576	1.21795	1.9
0.09	0.02			39.4011	2.43363	5.5
0.05	0.02	0.29		40.1445	2.51366	4.6
0.16	0.04			41.0678	7.6875	12.3
0.16	0.04	0.39		37.4813	10.4098	12.7
0.08	0.02	0.14		41.3565	3.56223	8.3
0.06		0.17		204.4	0.544747	1.4
0.2	0.06	0.25		237.9	11.677	18.8
0.21	0.06	0.26		285	10.6452	16.5
0.1	0.03	0.25		324.7	1.5625	2.5
0.19		0.33		389.6	3.35329	5.6
0.1	0.04				1.49733	2.8
0.203819		0.0781051
0.169444		0.050272
0.0784259		0.033195
0.21537	0.0341451	0.027361		53.9142	5.61538	11.68
0.279115	0.0436856	0.0665191		113.895	7.08571	9.92
0.35472	0.0532075	0.0870822		147.189	11.0693	11.18
0.254545	0.083838	0.186112		165.874
0.17904	0.05606	0.157829		146.073
0.357	0.118	0.028		278.009	7.96053	12.1
0.317	0.096	0.028		260.349	7.34854	10.31
0.364667	0.0653333			252.539	4.2587	5.64667
0.0800556	0.0550808	0.0546717		273.956	4.12684	4.552
0.263665	0.0525	0.01821				14.3
0.357	0.0765	0.0555		76.3825	8.89007	19.665
0.276	0.027	0.059		68.7285	11.3937	32.7
0.2045	0.0905	0.13		208.419
0.214286	0.0550556			207.752	7.1456	6.87339
0.413333	0.0796667			221.038	14.7889	13.5917
0.289524	0.0486111			164.143	6.54994	6.18605
0.323175	0.0655			132.5	9.57813	11.7674
0.19873	0.0346667			138.824	5.10572	6.4186
0.293968	0.0642778			135.511	8.49359	10.7855
0.200635	0.0435556			137.782	5.53276	8.14987
0.151429	0.0305556			115.496	4.227	7.85013
0.288889	0.0686667			177.06	8.60496	10.9406
0.274286	0.0572222			117.952	8.3515	10.1809
0.288571	0.0582222			114.608	8.15941	8.47028
0.188571	0.0374444			81.7621	5.09179	8.59948
0.235238	0.0525556			110.622	6.45767	8.03618
0.149206	0.0281111			174.47	4.73863	5.40052
0.371325	0.0785022	0.163276		146.923	9.37496	11.8417
0.320626	0.117423	0.170208		206.068	10.3485	13.3029
0.313454	0.0353098	0.1379		136.154	9.00604	21.6743
0.379545	0.0720538	0.145639		109.744	8.10563	15.3044
0.15	0.015	0.19		111.073	1.8028	2.6
0.126503	0.0467281	0.246016		105.448	0.955319	2.24167
0.14845	0.0639	0.24395			1.93389	2.28
0.162	0.0225	0.004		47.0284	7.36556	16.65
0.248687	0.049225			265.861
0.237316	0.0461025			224.84
0.338291	0.0529573			201.9	16.7424	31.3082
0.326325	0.0510427			186.18	13.8797	28.3145
0.32735	0.0501538			142.42	19.1391	22.2013
0.296923	0.0471111			160.07	13.7662	24.6415
0.292479	0.0464274			141.35	16.4899	22.5912
0.3	0.0453333			122.94	17.4542	19.7233
0.256752	0.0420513			104.14	6.69148	9.83648
0.264615	0.041812			100.24	8.30189	9.13208
0.251795	0.0406496			105.26	6.81565	9.61006
0.122823	0.024819	0.145869		92.5926
0.143044	0.0295879	0.0786521		72.2022
0.209709	0.0453894	0.0971538		114.286
0.127877	0.0222159	0.108349		72.9927
0.172192	0.0320024	0.0925487		40
0.082154	0.0201974	0.0842498		80.3213
0.11158	0.0322631	0.118528		77.821
0.124285	0.0285657	0.108226		84.3882
0.317662	0.0849232	0.0892574		204.082
0.182789	0.0510802	0.0871833		87.3362
0.220426	0.0638768	0.0850498		86.2069
0.128423	0.0349897	0.0865664		82.6446
0.296237	0.109504	0.220362		106.667	23.074	24.7
0.229226	0.090738	0.259292		150	13.9496	10.5
0.279586	0.122848	0.344439		108.8	20.7506	14.45
0.235	0.0945	0.169792		365.507
0.184	0.105	0.159207		296.518
0.131	0.07	0.217514		383
	0.0655	0.176968		185.444
0.1745	0.0505	0.17717		195.067
0.2065	0.0785	0.191391		400
0.2185	0.059	0.186562		390.523
0.1895	0.0975	0.157228		334.969
0.1615	0.073	0.151699		171.072
0.246	0.1245	0.1594		397.113
0.4175	0.19			231.997	9.67055	15.765
0.4	0.07	0.258935			11.0297	13.2048
0.32	0.06	0.238796			10.6079	10.1917
0.37	0.06	0.08			9.51389	13.7
0.27	0.05	0.25			7.38095	9.3
0.21	0.05	0.15			5.85586	6.5
0.623	0.107	0.196		735.2	17.6904	7.2
0.125	0.02	0.243		306.9	2.42459	2.09
0.233	0.042	0.244		320.4	5.70301	6.068
0.426	0.054	0.228		465.1	10.4282	7.55
0.6	0.095	0.036		150	17.02	27.53
0.22	0.055	0.049		80	5.31	8.53
0.4	0.066	0.056		150	8.09	14.13
0.35	0.061	0.032		170	7.13	11.4
0.42	0.07	0.036		160	11.89	20.48
0.26	0.057	0.039		80	7.89	14.4
0.737	0.1			628.5	15.3604	10.23
0.214	0.04			315.4	4.77891	5.62
0.702	0.107			735.2	17.6904	7.2
0.194	0.038			442.9	5.06403	4.35
0.13	0.0422385	0.100784		36.973	4.37319	13.15
0.0645	0.0280944	0.0313497		48.9796	2.29473	11.3
0.54047	0.0631605	0.112621	0.045742	245.7	6.05932	14.3
0.288889	0.045009	0.244649	0.099433	114.416	4.69828	10.9
0.277859	0.123336	0.183344	0.107705	150.15	11.8243	17.5
0.307867	0.100102	0.172009	0.106407	366.3	12.2093	10.5
0.336902	0.106792	0.175801	0.065693	191.205	6.02564	9.4
0.541606	0.0698119	0.111809	0.061477	246.914	6.60131	10.1
0.430657	0.08953	0.137149	0.060989	340.136	9.85507	13.6
0.544688	0.0518119	0.0958296	0.049797	186.567	4.375	7
0.319546	0.114536	0.190259	0.090186	295.858	13.0097	13.4
0.309651	0.0776667	0.152489	0.129278	156.25	7.09402	8.3
0.267833	0.0596653	0.158854
0.106		0.181783
0.041		0.110847
0.0665		0.150563
0.0725		0.158799
0.076		0.18455
0.058		0.131674
0.053		0.172771
0.045		0.249673
0.053		0.241828
0.054		0.20761
0.061		0.240116
0.073		0.184718
0.0785		0.202458
0.0505		0.179257
0.108507	0.00960069	0.0295139		89.55	0.875	2.87
0.0972138	0.0239418	0.0772557		70.34
0.426	0.0626	0.173		297.619	15.5862	22.6
0.17211	0.0704773	0.144365		86.2069	17.6923	23
0.195079	0.0843608	0.121646	0.0810673	41.4079	5.08603	12.3804
0.121112	0.0322916
0.13072	0.0335498	0.138492		52.1083	3.18461	9.34691
0.0424544			0.123388	54.2436	1.92517	9.10349
0.0684933			0.209371	73.9883	2.79048	9.08308
0.0904105			0.281484	20.6041	4.63891	17.505
0.141601			0.180768	58.3587	4.71369	5.63378
0.0769923			0.217768	38.8896	2.27256	6.10657
0.133207			0.129676	87.8286	3.67928	6.33262
0.11423			0.19517	19.5379	5.02346	11.6129
0.126908			0.308605	71.4272	6.10155	7.45319
0.11881			0.113082	124.45	7.06383	16.0254
0.0997909			0.101888	79.0262	4.84792	10.3572
0.101105			0.190094	60.1509	8.15476	11.6366
0.145585			0.110818	96.5043	4.4272	6.66727
0.149716			0.161658	117.09	6.17898	7.28242
0.088469			0.162097	60.0188	3.56025	7.18748
0.147735			0.224383	111.229	10.4158	12.8915
0.170317			0.208713	121.888	8.43322	12.8229
0.13496			0.147285	162.385	9.13457	10.9065
0.152982			0.211465	166.268	10.8701	8.04939
0.163668			0.15326	139.881	11.6501	13.1753
0.144139			0.22522	114.641	9.19126	17.399
0.12043			0.175516	41.4993	7.29427	14.5229
0.149072			0.197329	57.8481	9.7873	15.244
0.159458			0.0719199	55.1369	10.2214	17.9265
0.33	0.07	0.11		215	14.4167	17.3
0.23	0.05	0.09		162	10.8475	12.8
0.21	0.04	0.1		179	8.7069	10.1
0.108	0.0807	0.135	0.0947		19.3	28
0.272	0.0806	0.176	0.0947		19.5	25.5
0.332	0.0594	0.133	0.0712		14.6	27.8
0.331			0.067	418.76	17.6812	17.08
0.267			0.042	328.407	23.0337	28.7
0.203			0.013	551.876	15.4195	13.6
0.245			0.054	142.959	9.22211	18.85
0.137			0.028	257.136	11.2772	18.63
0.313			0.06	254.13	12.0544	19.07
0.301			0.022	392.003	15.1717	22.09
0.138			0.064	213.493	5.98765	6.79
0.181			0.032	153.046	6.08571	10.65
0.229			0.056	203.417	6.07143	6.97
0.164			0.017	166.556	8.65332	19.02
0.259			0.037	197.511	6.20714	8.69
0.262			0.109	144.113	6.8022	12.38
0.22			0.023	285.796	11.4085	17.09
0.252			0.022	185.322	8.91775	12.36
0.246			0.038	193.311	7.7153	15.23
0.196			0.098	70.0771	3.34249	7.3
0.186			0.089	177.841	5.54217	6.44
0.213			0.057	155.86	5.56522	8.96
0.132			0.131	126.183	4.52857	6.34
0.181			0.065	107.701	4.51737	7.02
0.245			0.324	61.1359	4.03262	7.17
0.179			0.087	110.314	2.80312	4.67
0.371789	0.0992	0.1491	0.041	197.226	17.5718	21.7734
0.317167	0.104717	0.2255		273.361	14.0177	10.0033
0.1487			0.0649	124.743	7.27933	8.313
0.1431			0.06891	114.466	6.49431	7.423
0.1344			0.07352	98.9178	5.80451	6.948
0.1303			0.07649	92.2118	5.80159	6.579
0.1679			0.04836	163.597	7.19136	9.658
0.1628			0.05691	153.657	7.13419	8.347
0.1507			0.06005	129.014	6.5325	6.833
0.1456			0.06299	118.853	6.18936	5.818
0.234017		0.185933			14.5722	18.62
0.184755	0.0373946	0.172991		138.872	3.64066	5.946
0.186678	0.0346581	0.152788			3.54819	6.00948
0.193667	0.14	0.176
0.135333	0.102333	0.188
0.202667	0.0833333	0.212333
0.184667	0.111	0.253667
0.0627815		0.117832
0.169965	0.0443277	0.121811
0.305	0.06	0.11	0.08	197.044	12.6314	15.7
0.22	0.05	0.09	0.13	161.812	10.6667	12.8
0.290507			0.109084	105.637	5.45131	13.5105
0.334529			0.0903296	119.105	6.03812	14.9597
0.240436			0.143333	85.2016	2.27117	7.87037
0.271238			0.111025	100.946	4.61294	12.2102
0.292827			0.114102	114.493	4.93224	12.657
0.204923			0.154359	90.9242	2.31674	7.48793
0.229598			0.123851	79	3.11224	7.72152
0.247989			0.135345	72	2.59259	8.75
0.346552			0.113506	114	7.8022	12.4561
0.327586			0.0979885	119	8.83871	11.5126
0.325575			0.102874	116	9.73684	12.7586
0.306609			0.108333	102	6.78788	10.9804
0.221839			0.152586	66	3.71429	7.87879
0.231609			0.168103	61	3.52941	7.86885
0.224713			0.175862	62	2.97101	6.6129
0.381174			0.0863471	207.575	7.96259	12.9816
0.270379			0.105229	172.518	5.96716	10.5733
0.501079	0.0806364	0.128911		146.306	11.3135	28.0979
0.21445	0.0597	0.06005	0.09685	331.752	5.86025	10.366
0.363333	0.0742333	0.166033		210.379	6.49183	6.7
0.3995	0.081	0.1535	0.1645		10.3306	18.925
0.2105	0.0595	0.048	0.2045	241.838	10.2047	15.465
0.163333	0.0383333	0.07	0.101667
0.143333	0.0633333	0.0683333	0.0783333
0.13	0.0533333	0.055	0.09
0.29	0.03	0.26		81.6327	10.0763	13.2
0.285	0.025	0.041				13.679
0.270706
0.4033	0.06025	0.20775		111.185	5.1437	9.61
0.182378	0.0274612	0.0455846
0.145198	0.0322034	0.00564972		57.2738	4.63277	8.2
0.111208	0.0214917			147.887	4.7472	3.98765
0.187979	0.0334343			182.509	7.3482	6.18519
0.185772	0.0236179			124.583	6.51385	15.0864
0.1275	0.054	0.2505	0.1005		16.2097	31.05
0.2185			0.3865	54.0225	2.59292	5.94
0.133974	0.0302015			64.3061
0.127438	0.0280961			50.2544
0.139748	0.0358997			52.7939
0.1403	0.0338667			63.2911
0.1925	0.0369	0.0887302		78.0031	3.76254	8.785
0.162179	0.0428384	0.126633		116.392	6.73629	15.59
0.148192	0.0403589	0.133745		93.1561	5.7684	14.5786
0.1145	0.0159			163.47	6.70914	15.3
0.1707	0.025			164.061	7.34816	13
0.2676	0.0389			220.88	12.8441	19.37
0.7553	0.0973			325.126	20.916	17.87
0.6049	0.0789			404.697	18.4665	17.59
0.5639	0.0745			329.437	18.1115	18.6
0.216667			0.0673333	212.465
0.258667
0.256
0.179333
0.0553333
0.323823	0.0663205			187.441
0.105667	0.0453333	0.292667	0.0593333
0.115	0.0473333	0.163	0.236
0.114678				98.8211
0.11555			0.053075	205.74	17.6657	17.6275
0.218862	0.0302354	0.0855379		133.333	5.13629	13.7401
0.126034	0.0348855	0.128079		125	3.10556	5.09986
0.11435	0.0248889	0.069808			2.50814	7.68855
0.247024	0.143526			204.982
0.218056	0.12838			131.058
0.335714	0.190124			148.263
0.164683	0.095218			170.793
0.125397	0.0803432			153.09
0.141667	0.0806186			117.252
0.141071	0.0764549			117.073
0.146115				353.077
0.255	0.112548	0.184598		181.818
0.259	0.0772576	0.145		250
0.201		0.159345		181.818
0.158	0.091706	0.1079		125
0.48	0.064	0.33		438.596	11.7	15
0.54	0.106	0.17		531.915	14.6	15.1
0.46	0.077	0.16		495.05	11.8	16.4
0.154817	0.032039	0.137647			5.91503	21.3985
0.302737	0.0358343	0.151615	0.142863
0.135474	0.0671556	0.192878		99.0099	8.09764	13.1
0.227517	0.0482392	0.163798
0.147677	0.0287187	0.0986594
0.18598	0.0372529	0.117162
0.0729333	0.00726667	0.025		145.307	2.337	3.19
0.293	0.041	0.052		136.054	11.5368	14.5
0.181	0.022	0.041		128.205	5.49451	7.5
0.458846	0.0540227	0.132217		240	10.5259	28.42
0.618996	0.0853536	0.165694		220	17.8235	27.27
0.296893
0.23999
0.167692	0.047864	0.089059	0.182
0.162393	0.044957	0.084787	0.179
0.236923	0.064274	0.110427	0.085
0.21094	0.069402	0.107179	0.076
0.099	0.024	0.013	0.24	121.566	2.33488	5.02
0.12	0.026	0.015	0.15	97.352	3.47748	7.72
0.12	0.027	0.016	0.09	142.349	2.7316	6.31
0.16	0.034	0.018	0.23	133.851	4.12143	5.77
0.12	0.025	0.016	0.3	84.9618	3.45161	8.56
0.15	0.031	0.015	0.28	71.9891	3.64238	5.5
0.2	0.041	0.014	0.46	117.261	5.19626	5.56
0.14	0.029	0.016	0.13	85.1716	3.96491	9.04
0.2	0.047	0.017	0.29	111.807	4.75	5.7
0.19	0.034	0.018	0.37	102.187	4.00725	5.53
0.13	0.03	0.1	0.07	144.991	3.67123	8.04
0.16	0.04	0.06	0.05	140.154	3.28358	6.6
0.3	0.07	0.07	0.27	99.8702	8	8.16
0.26	0.07	0.12	0.22	147.929	8.30097	8.55
0.192667	0.0436667	0.14	0.0653333	199.867	5.29582	7.74
0.211667	0.0496667	0.113	0.043	177.725	4.34152	7.60333
0.26	0.057	0.122	0.350667	126.689	6.46149	5.63667
0.302	0.0726667	0.137	0.189333	205.058	8.60048	6.74333
0.0953333
0.22	0.06	0.0484708		65.4836	4.76768	9.44
0.31	0.08	0.0776445		163.399	6.23308	8.29
0.24	0.06	0.048012		87.4279	5.44667	8.17
0.0300667		0.0508431
0.31	0.052			156.617
0.35	0.07			238.379
0.4225	0.082	0.2525		441.501	13.2066	14.7075
0.163667	0.0386507	0.151889		53.3917	5.36667	12.2667
0.196497	0.0528187	0.0844849		125.807
0.0969207	0.0359713	0.0797649		84.0727
0.0887518	0.0747796			184.162
0.1196	0.0371	0.0274		55.4508	4.15003	9.27
0.0383	0.0123	0.0166		59.5486	2.14105	5.57
0.0565	0.0166	0.0216		63.2511	1.68548	7.11
0.0368	0.01	0.0101		43.5407	1.1413	7.39
0.0164	0.0085	0.0074		37.2439	1.14967	5.07
0.261278	0.0546871	0.0721018		35.2482	6.47386	12.3698
0.256261	0.0551591	0.0688676		63.3071	7.66778	15.1303
0.166			0.146	160.3	10.226	11.2913
0.187			0.108	191.5	9.36768	10.4439
0.518515	0.0696398	0.0399472		347.843
0.480343	0.0589542	0.0454511		206.168
0.42	0.128412			183.442	13.9348	13.2
0.179002		0.130596		26.3551	2.9682	9.5375
0.43	0.137061	0.106523		140	20.4082	18
0.42	0.156223	0.121025		170	20.4082	16
0.39	0.156472	0.111325		180	22.5564	18
0.48	0.164113	0.140273		180	19.0476	12
0.36	0.105597	0.0898964		180	15.1261	18
0.41	0.144603	0.118796		210	22.7273	21
0.32	0.105436	0.0930233		120	15.4286	27
0.34	0.112503	0.108788		170	11.2045	16
0.4	0.0895521	0.0911314		130	11.9048	24
0.0775		0.14		68.5	8.17517	9.425
0.20675		0.11		56.6	7.76604	10.875
0.10275		0.1375		39.1	2.70566	15.3
0.085		0.09		32.3	4.82835	14.5
0.048		0.15		124.1	8.22258	10.8
0.117		0.19		42.5	2.81686	5.7
0.266		0.22		108.5	5.425	6.9
0.212		0.36		60.9	4.43944	7.8
0.093		0.28		72.4	4.54821	9.8
0.24		0.21		51	3.76311	7.6
0.20125
0.301667	0.0236749	0.0928794		20.0262
0.187	0.0482828	0.0944172		50.1
0.3237	0.0523989	0.105001		74.8
0.1817	0.0541516	0.107248		57.4
0.1758	0.0525405	0.0918595		57.6
0.22	0.052804	0.101296		52.9
0.1383	0.0635167	0.103683		54.7
0.2393	0.0537874	0.111913		51.3
0.1527	0.0425218	0.0793782		46.4
0.1751	0.0428911	0.0819089		46.3
0.2437	0.049829	0.091771		72.2
0.24005	0.0615629	0.112137		79.3008
0.252	0.0544242	0.105076		71.9
0.2561	0.044381	0.090919		44.1
0.185	0.0510202	0.0962798		36.5
0.3202	0.0518153	0.0971847		69.8
0.2252	0.0479261	0.0904739		59.4
0.359	0.0644499	0.11765		64.6
0.1119	0.0428316	0.0804684		42.8
0.191667	0.0473006	0.0918328		52.3503
0.2105	0.0518398	0.0977602		40.5
0.1826	0.0630952	0.121305		71.4
0.1859	0.0580403	0.11136		55.5
0.1519	0.0512343	0.0995657		60.1
0.246667	0.0533867	0.100413		64.9154
0.3417	0.0468393	0.0881607		42.9
0.2865	0.0610679	0.117532		64.3
0.2163	0.0371518	0.0737482		56.8
0.0942	0.0427329	0.0847671		37.7
0.2228	0.0517979	0.0896021		63.4389
0.1527	0.0338583	0.0664417		42.7
0.2678	0.0417947	0.0814053		52.7
0.266	0.0404754	0.0790246		41.2
0.1417	0.04347	0.08513		61.6
0.2203	0.033461	0.067939		38.7
0.127	0.0498993	0.0931007		45.4
0.0979	0.0427581	0.0794419		36.5
0.167	0.0374953	0.0717047		39.6
0.2615	0.0398195	0.0778805		41
0.2533	0.0435534	0.0898466		57.4
0.18515	0.041639	0.081661		46.3087
0.3589	0.0435037	0.0847963		50
0.1689	0.038118	0.072882		32.3
0.1987	0.0452456	0.0873544		28.2
0.3094	0.0465054	0.0900946		61.9
0.2243	0.0296504	0.0590496		41
0.1518	0.0427706	0.0840294		46.1
0.1624	0.0299316	0.0559684		32.2
0.189267	0.0381455	0.0745211		44.8596
0.1719	0.0385861	0.0743139		37.1
0.1413	0.0333381	0.0680619		38.8
0.1777	0.0448194	0.0885806		49
0.2336	0.0483086	0.0872914		57.4377
0.1676	0.0319849	0.0630151		36.8
0.2346	0.0460894	0.0859106		46.9
0.1896	0.0342805	0.0643195		41.2
0.2173	0.0427501	0.0826999		48.5503
0.165		0.116468		59.0164	4.5409	9.5
0.1382	0.04	0.1736	0.0929	112.779	6.32145	12.232
0.28121	0.054398	0.125392		125
0.22908	0.05478	0.13114		103
0.167826	0.050213	0.118961		256
0.277728	0.07656	0.173712		257
0.23571	0.08439	0.1649		313
0.256372	0.058636	0.11342		369
0.278208	0.085491	0.119301		414
0.167436
0.173909
0.0768	0.0283	0.0631	0.426532	34.2924	2.99606	7.61
0.24375	0.04	0.00925	0.3747		6.39638	10.3418
0.1375	0.02875	0.04125	0.1175	108.71	3.00799	9.12
0.200667	0.0506667	0.231	0.0673333		4.10944	2.8
0.0861538	0.0131027	0.0800623	0.0683128	254.937	3.21743	4.07143
0.0895726	0.0129979	0.0937072	0.0854321	240.819	3.43463	3
0.126496	0.0163522	0.0903427	0.0887243	239.222	3.73129	3
0.253333	0.0311321	0.148723	0.0793416	265.229	7.21587	5.05556
0.136068	0.0168763	0.0902181	0.103868	222.706	3.61367	3.35714
0.155897	0.0207547	0.0874143	0.10535	222.8	4.82087	4.27778
0.211624	0.0528302	0.113271	0.100247	164.771	5.79897	6.94444
0.135726	0.0168763	0.0854206	0.131029	110.812	3.45182	4.71429
0.116923	0.0148847	0.103115	0.125926	112.35	2.7622	2.87302
0.246154	0.0356394	0.100312	0.111276	140.444	4.31477	6.28571
0.119658	0.0171908	0.0879751	0.143704	104.927	3.38649	4.89683
0.133333	0.0215933	0.0976324	0.147984	100.199	3.41544	4.12698
0.218462	0.0265199	0.107726	0.10321	154.79	4.44445	5.55556
0.191111	0.0283019	0.0841745	0.14535	91.9436	3.80328	5.18254
0.160342	0.0235849	0.078567	0.139918	96.2202	3.57081	5.04762
0.282393	0.0403564	0.0923988	0.107325	108.394	4.46753	6.14286
0.19453	0.0325996	0.0711526	0.138107	81.1761	3.20844	5.43651
0.182222	0.0263103	0.0601869	0.136296	79.0509	2.55497	4.92857
0.123077	0.0227463	0.0710903	0.165926	80.9463	2.3733	4.51587
0.231453	0.0359539	0.102492	0.138107	89.6553	4.51852	6.77778
0.22906	0.0377358	0.125607	0.121481	97.9504	5.51626	6.21429
0.228034	0.0334382	0.0758255	0.177284	97.6866	4.21042	6.95238
0.277265	0.0422432	0.105047	0.140412	121.837	5.74857	8.13492
0.234188	0.0539832	0.111963	0.130535	132.191	6.6851	8.42857
0.226959	0.0190669	0.0821364		111.111	8.42204	11.2654
0.404	0.0726667	0.079			12.3445	24.1577
0.338602	0.0428771	0.0240597		134.731	5.8418	16.8006
0.23375	0.030625	0.0236105		102.747	6.37959	28.7125
0.137043		0.196358	0.0727891	288.018	7.47246	7.2
0.135101	0.018434	0.183081	0.111111	127.545	2.34072	2.26852
0.094697	0.017172	0.119949	0.352273	127.195	1.80717	2.11934
0.322861			0.0216575	250.048	6.78019	12.7989
0.11136	0.0476316	0.117099			2.20877	2.805
0.1775	0.0976	0.0498333
0.105	0.0847111	0.0455556
0.0847465	0.0260864	0.0138596	0.337739	110.07	4.83259	11.1574
0.220468	0.0445925	0.0273392	0.257471	97.6302	7.70966	15.5298
0.211501	0.0384568	0.0365887	0.159962	118.889	9.33027	25.9259
0.204043	0.0286954	0.0936507		254.237	6.02648	5.47988
0.217783	0.0361111	0.0890625		238.938	6.1793	5.84483
0.187333	0.0273333	0.158667		160.179
0.0513333	0.0153333	0.039		49.4234	1.49189	5.31667
0.250243	0.0758616	0.178061		231.646	11.1532	13.3178
0.234093	0.0692959	0.156153		296.333	9.26276	9.20398
0.221756	0.0660996	0.158853		274.071	9.16639	8.84951
0.33075	0.07925	0.2045	0.046875	291.397	17.1812	16.4887
0.23	0.04	0.1		153.4	5.65217	11.7
0.11	0.03	0.17		145.2	3.38078	9.5
0.07	0.03	0.28		137.5	2.07207	6.9
0.336621	0.0460039	0.102458				7.15926
0.295085	0.0434048	0.0209091				3.62222
0.474385	0.119564	0.157809		145.56	12.2819	18.3
0.181617	0.0615568	0.24793		100.908	4.70852	10.5
0.169458	0.044591	0.15954		73.4754	4.43515	10.6
0.223812	0.0539844	0.138952		58.9275	5.88424	18.3
0.229241	0.041248	0.239757		87.3362	5.72727	12.6
0.125588	0.0258929	0.298212		59.9161	3.13916	9.7
0.141952	0.0401051	0.298173		84.3882	4.02844	8.5
0.22583		0.25917		79.8085	5.64246	10.1
0.20754		0.248393		77.2798	5.43147	10.7
0.131537	0.0295482	0.130189		73.4754	3.47222	10
0.0725973	0.0258364	0.270541		79.4281	1.85714	6.5
0.118174	0.0281127	0.196176		65.0618	3.08696	7.1
0.1025	0.0235	0.0235		100.338	2.56771	5.4925
0.295	0.011	0.198		390.93
0.2	0.06	0.04		60.6061	6.58259	23.33
0.23	0.04	0.16		153.4	5.65217	11.7
0.11	0.03	0.2		145.2	3.38078	9.5
0.07	0.03	0.29		141.5	2.07207	6.9
0.284267			0.125556	126.975	7.98513	22.6778
0.29	0.04	0.29	0.16		13.195
0.158232	0.07861	0.191296	0.0538462		15.757	17.963
0.215967	0.0424333	0.1251	0.1278	121.674	8.4288	26.1367
0.239	0.0368	0.119	0.1088	433.463	7.73402	11.98

## Sheet: Figure 4
Mycorrhiza type	PR	se	Pcw	se		Mycorrhiza type	PB	se	Pcw	se		Mycorrhiza type	PL	se	Pcw	se		Mycorrhiza type	N-photo	se	Pcw	se
Woody-AM	0.54047	0.0326259	0.045742	0.00208244		Woody-AM	0.0631605	0.00673998	0.045742	0.00208244		Woody-AM	0.112621	0.0093851	0.045742	0.00208244		Woody-AM	0.716252	0.0346115	0.045742	0.00208244
Woody-AM	0.288889	0.0331884	0.099433	0.00804811		Woody-AM	0.045009	0.00308528	0.099433	0.00804811		Woody-AM	0.244649	0.0203874	0.099433	0.00804811		Woody-AM	0.578546	0.0390722	0.099433	0.00804811
Woody-AM	0.277859	0.0364176	0.107705	0.00796722		Woody-AM	0.123336	0.0123597	0.107705	0.00796722		Woody-AM	0.183344	0.0152787	0.107705	0.00796722		Woody-AM	0.584539	0.0413816	0.107705	0.00796722
Woody-AM	0.307867	0.000895315	0.106407	0.005823		Woody-AM	0.100102	0.00277436	0.106407	0.005823		Woody-AM	0.172009	0.0143341	0.106407	0.005823		Woody-AM	0.579978	0.0146275	0.106407	0.005823
Woody-AM	0.336902	0.0839071	0.065693	0.00229922		Woody-AM	0.106792	0.0147847	0.065693	0.00229922		Woody-AM	0.175801	0.0146501	0.065693	0.00229922		Woody-AM	0.619495	0.0864501	0.065693	0.00229922
Woody-AM	0.541606	0.0608931	0.061477	0.00383078		Woody-AM	0.0698119	0.00831704	0.061477	0.00383078		Woody-AM	0.111809	0.00931742	0.061477	0.00383078		Woody-AM	0.723227	0.0621608	0.061477	0.00383078
Woody-AM	0.430657	0.0725335	0.060989	0.00277656		Woody-AM	0.08953	0.012679	0.060989	0.00277656		Woody-AM	0.137149	0.0114291	0.060989	0.00277656		Woody-AM	0.657336	0.074515	0.060989	0.00277656
Woody-AM	0.544688	0.0192493	0.049797	0.001533		Woody-AM	0.0518119	0.00248537	0.049797	0.001533		Woody-AM	0.0958296	0.0079858	0.049797	0.001533		Woody-AM	0.692329	0.0209877	0.049797	0.001533
Woody-AM	0.319546	0.0313969	0.090186	0.00800207		Woody-AM	0.114536	0.00849368	0.090186	0.00800207		Woody-AM	0.190259	0.0158549	0.090186	0.00800207		Woody-AM	0.62434	0.036184	0.090186	0.00800207
Woody-AM	0.309651	0.0480409	0.129278	0.0103642		Woody-AM	0.0776667	0.00883686	0.129278	0.0103642		Woody-AM	0.152489	0.0127074	0.129278	0.0103642		Woody-AM	0.539806	0.0504728	0.129278	0.0103642
Woody-EcM	0.195079	0.0183335	0.0810673	0.0123768		Woody-EcM	0.0843608	0.011572	0.0810673	0.0123768		Woody-EcM	0.121646	0.01214	0.0810673	0.0123768		Woody-EcM	0.405474	0.0251888	0.0810673	0.0123768
Others	0.0424544	0.0107382	0.123388	0.00873799		Others	0.0807	0.0039	0.0947	0.009		Others	0.135	0.0086	0.0947	0.009		Others	0.3237	0.0160677	0.0947	0.009
Others	0.0684933	0.00445888	0.209371	0.0158438		Others	0.0806	0.0049	0.0947	0.0078		Others	0.176	0.015	0.0947	0.0078		Others	0.5286	0.0562584	0.0947	0.0078
Others	0.0904105	0.0171304	0.281484	0.0121701		Others	0.0594	0.0027	0.0712	0.008		Others	0.133	0.0087	0.0712	0.008		Others	0.5244	0.0294445	0.0712	0.008
Others	0.141601	0.010276	0.180768	0.00989686		Herb-AM	0.0992	0.00366424	0.041	0.00132404		Herb-AM	0.1491	0.00330843	0.041	0.00132404		Herb-AM	0.620089	0.0155449	0.041	0.00132404
Woody-EcM	0.0769923	0.00680091	0.217768	0.00284989		Woody-AM	0.06	0.004	0.08	0.002		Woody-AM	0.11	0.007	0.08	0.002		Woody-AM	0.475	0.03	0.08	0.002
Woody-EcM	0.133207	0.00956134	0.129676	0.00222513		Herb-AM	0.05	0.003	0.13	0.006		Herb-AM	0.09	0.005	0.13	0.006		Herb-AM	0.36	0.023	0.13	0.006
Others	0.11423	0.00895996	0.19517	0.0335389		Herb-AM	0.0597	0.00431335	0.09685	0.00866206		Herb-AM	0.06005	0.0110662	0.09685	0.00866206		Herb-AM	0.3342	0.0235467	0.09685	0.00866206
Others	0.126908	0.0114366	0.308605	0.0676147		Herb-AM	0.081	0.006255	0.1645	0.00831039		Herb-AM	0.1535	0.00461655	0.1645	0.00831039		Herb-AM	0.634	0.0257294	0.1645	0.00831039
Woody-AM	0.11881	0.00507926	0.113082	0.00452288		Others	0.0595	0.002	0.2045	0.01		Others	0.048	0.003	0.2045	0.01		Others	0.3205	0.01	0.2045	0.01
Woody-EcM	0.0997909	0.0117475	0.101888	0.00992895		Woody-AM	0.0383333	0.00136083	0.101667	0.00892354		Woody-AM	0.07	0.00235702	0.101667	0.00892354		Woody-AM	0.271667	0.0191968	0.101667	0.00892354
Woody-AM	0.101105	0.00615835	0.190094	0.000908481		Woody-AM	0.0633333	0.00360041	0.0783333	0.00360041		Woody-AM	0.0683333	0.00136083	0.0783333	0.00360041		Woody-AM	0.275	0.0108012	0.0783333	0.00360041
Woody-AM	0.145585	0.0088564	0.110818	0.0125182		Woody-EcM	0.0533333	0.000408924	0.09	0.000613386		Woody-EcM	0.055	0	0.09	0.000613386		Woody-EcM	0.238333	0.000540956	0.09	0.000613386
Woody-EcM	0.149716	0.0047798	0.161658	0.0338137		Herb-AM	0.054	0.00707107	0.1005	0.00106066		Herb-AM	0.2505	0.0180312	0.1005	0.00106066		Herb-AM	0.432	0.0233345	0.1005	0.00106066
Woody-EcM	0.088469	0.0268942	0.162097	0.0192816		Woody-AM	0.0453333	0.000272166	0.0593333	0.00756209		Woody-AM	0.292667	0.0154224	0.0593333	0.00756209		Woody-AM	0.443667	0.0158114	0.0593333	0.00756209
Woody-AM	0.147735	0.00613771	0.224383	0.00253915		Woody-AM	0.0473333	0.00334443	0.236	0.0236126		Woody-AM	0.163	0.00535413	0.236	0.0236126		Woody-AM	0.325333	0.00663883	0.236	0.0236126
Woody-AM	0.170317	0.00768145	0.208713	0.0514318		Others	0.0358343	0.000733134	0.142863	0.0111313		Others	0.151615	0.0189342	0.142863	0.0111313		Others	0.483748	0.0209112	0.142863	0.0111313
Others	0.13496	0.0128215	0.147285	0.0359602		Woody-EcM	0.047864	0.00430776	0.182	0.01547		Woody-EcM	0.089059	0.00712472	0.182	0.01547		Woody-EcM	0.304615	0.0157889	0.182	0.01547
Others	0.152982	0.0135188	0.211465	0.0324526		Woody-EcM	0.044957	0.00404613	0.179	0.015215		Woody-EcM	0.084787	0.00678296	0.179	0.015215		Woody-EcM	0.292137	0.0152039	0.179	0.015215
Others	0.163668	0.0147409	0.15326	0.0296085		Woody-EcM	0.064274	0.00578466	0.085	0.007225		Woody-EcM	0.110427	0.00883416	0.085	0.007225		Woody-EcM	0.411624	0.0216968	0.085	0.007225
Others	0.144139	0.0075725	0.22522	0.0448828		Woody-EcM	0.069402	0.00624618	0.076	0.00646		Woody-EcM	0.107179	0.00857432	0.076	0.00646		Woody-EcM	0.387521	0.0199325	0.076	0.00646
Others	0.12043	0.00934707	0.175516	0.0414646		Woody-AM	0.024	0.003	0.24	0.015		Woody-AM	0.013	0.003	0.24	0.015		Woody-AM	0.14	0.017	0.24	0.015
Woody-EcM	0.149072	0.0112463	0.197329	0.0286352		Woody-AM	0.026	0.002	0.15	0.008		Woody-AM	0.015	0.001	0.15	0.008		Woody-AM	0.16	0.014	0.15	0.008
Others	0.159458	0.00604294	0.0719199	0.00971114		Woody-AM	0.027	0.003	0.09	0.003		Woody-AM	0.016	0.001	0.09	0.003		Woody-AM	0.16	0.022	0.09	0.003
Others	0.108	0.013	0.0947	0.009		Woody-AM	0.034	0.002	0.23	0.009		Woody-AM	0.018	0.001	0.23	0.009		Woody-AM	0.21	0.009	0.23	0.009
Others	0.272	0.054	0.0947	0.0078		Woody-AM	0.025	0.004	0.3	0.008		Woody-AM	0.016	0.001	0.3	0.008		Woody-AM	0.17	0.016	0.3	0.008
Others	0.332	0.028	0.0712	0.008		Woody-EcM	0.031	0.001	0.28	0.016		Woody-EcM	0.015	0.001	0.28	0.016		Woody-EcM	0.2	0.007	0.28	0.016
Others	0.331	0.042	0.067	0.002		Woody-EcM	0.041	0.003	0.46	0.03		Woody-EcM	0.014	0.002	0.46	0.03		Woody-EcM	0.26	0.017	0.46	0.03
Herb-AM	0.267	0.038	0.042	0.011		Woody-EcM	0.029	0.002	0.13	0.006		Woody-EcM	0.016	0.002	0.13	0.006		Woody-EcM	0.19	0.013	0.13	0.006
Others	0.203	0.016	0.013	0.009		Woody-EcM	0.047	0.007	0.29	0.025		Woody-EcM	0.017	0.002	0.29	0.025		Woody-EcM	0.27	0.041	0.29	0.025
Others	0.245	0.01	0.054	0.004		Woody-EcM	0.034	0.005	0.37	0.03		Woody-EcM	0.018	0.001	0.37	0.03		Woody-EcM	0.24	0.028	0.37	0.03
Herb-AM	0.137	0.005	0.028	0.001		Woody-AM	0.03	0.002	0.07	0.015		Woody-AM	0.1	0.008	0.07	0.015		Woody-AM	0.27	0.016	0.07	0.015
Others	0.313	0.035	0.06	0.023		Woody-AM	0.04	0.003	0.05	0.019		Woody-AM	0.06	0.009	0.05	0.019		Woody-AM	0.27	0.018	0.05	0.019
Herb-AM	0.301	0.037	0.022	0.007		Woody-EcM	0.07	0.003	0.27	0.019		Woody-EcM	0.07	0.008	0.27	0.019		Woody-EcM	0.44	0.018	0.27	0.019
Woody-AM	0.138	0.015	0.064	0.014		Woody-EcM	0.07	0.007	0.22	0.042		Woody-EcM	0.12	0.011	0.22	0.042		Woody-EcM	0.44	0.042	0.22	0.042
Woody-AM	0.181	0.024	0.032	0.013		Woody-AM	0.0436667	0.00266667	0.0653333	0.00466667		Woody-AM	0.14	0.005	0.0653333	0.00466667		Woody-AM	0.376333	0.0193333	0.0653333	0.00466667
Woody-AM	0.229	0.009	0.056	0.02		Woody-AM	0.0496667	0.00266667	0.043	0.00166667		Woody-AM	0.113	0.007	0.043	0.00166667		Woody-AM	0.374333	0.0136667	0.043	0.00166667
Woody-AM	0.164	0.028	0.017	0.009		Woody-EcM	0.057	0.00366667	0.350667	0.02		Woody-EcM	0.122	0.0116667	0.350667	0.02		Woody-EcM	0.439	0.0216667	0.350667	0.02
Woody-EcM	0.259	0.043	0.037	0.014		Woody-EcM	0.0726667	0.00533333	0.189333	0.0106667		Woody-EcM	0.137	0.007	0.189333	0.0106667		Woody-EcM	0.511667	0.0303333	0.189333	0.0106667
Woody-EcM	0.262	0.033	0.109	0.027		Herb-AM	0.04	0.000521964	0.0929	0.000883721		Herb-AM	0.1736	0.00941085	0.0929	0.000883721		Woody-AM	0.715	0.031	0.146	0.016
Woody-AM	0.22	0.019	0.023	0.003		Others	0.0283	0.0043	0.426532	0.0309278		Others	0.0631	0.0056	0.426532	0.0309278		Herb-AM	0.668	0.019	0.108	0.005
Woody-AM	0.252	0.015	0.022	0.007		Woody-EcM	0.04	0.0025	0.3747	0.0252751		Woody-EcM	0.00925	0.001	0.3747	0.0252751		Herb-AM	0.3518	0.00967317	0.0929	0.000883721
Woody-AM	0.246	0.07	0.038	0.024		Woody-AM	0.02875	0.00125	0.1175	0.00625		Woody-AM	0.04125	0.0025	0.1175	0.00625		Others	0.1682	0.0164882	0.426532	0.0309278
Woody-AM	0.196	0.034	0.098	0.015		Woody-AM	0.0506667	0.0166689	0.0673333	0.00830439		Woody-AM	0.231	0.0225438	0.0673333	0.00830439		Woody-EcM	0.293	0.0236714	0.3747	0.0252751
Woody-AM	0.186	0.016	0.089	0.013		Herb-AM	0.0131027	0.0038784	0.0683128	0.0057613		Herb-AM	0.0800623	0.005109	0.0683128	0.0057613		Woody-AM	0.2075	0.02	0.1175	0.00625
Woody-AM	0.213	0.011	0.057	0.022		Herb-AM	0.0129979	0.0030398	0.0854321	0.006749		Herb-AM	0.0937072	0.0100938	0.0854321	0.006749		Woody-AM	0.482333	0.0356038	0.0673333	0.00830439
Woody-EcM	0.132	0.014	0.131	0.008		Herb-AM	0.0163522	0.001782	0.0887243	0.0062551		Herb-AM	0.0903427	0.0175073	0.0887243	0.0062551		Herb-AM	0.177778	0.024822	0.0683128	0.0057613
Woody-AM	0.181	0.009	0.065	0.024		Herb-AM	0.0311321	0.0095388	0.0793416	0.0136625		Herb-AM	0.148723	0.018878	0.0793416	0.0136625		Herb-AM	0.19086	0.036226	0.0854321	0.006749
Woody-EcM	0.245	0.01	0.324	0.021		Herb-AM	0.0168763	0.0031447	0.103868	0.012346		Herb-AM	0.0902181	0.0155759	0.103868	0.012346		Herb-AM	0.229434	0.029853	0.0887243	0.0062551
Woody-AM	0.179	0.007	0.087	0.0054		Herb-AM	0.0207547	0.0044025	0.10535	0.014979		Herb-AM	0.0874143	0.0157007	0.10535	0.014979		Herb-AM	0.431027	0.064738	0.0793416	0.0136625
Herb-AM	0.371789	0.0128774	0.041	0.00132404		Woody-AM	0.0528302	0.0068134	0.100247	0.012016		Woody-AM	0.113271	0.014268	0.100247	0.012016		Herb-AM	0.241509	0.042265	0.103868	0.012346
Woody-EcM	0.1487	0.00227	0.0649	0.00149		Woody-AM	0.0168763	0.0040881	0.131029	0.011358		Woody-AM	0.0854206	0.0145171	0.131029	0.011358		Herb-AM	0.260294	0.044612	0.10535	0.014979
Woody-EcM	0.1431	0.00071	0.06891	0.00093		Woody-AM	0.0148847	0.0033543	0.125926	0.012346		Woody-AM	0.103115	0.025857	0.125926	0.012346		Woody-AM	0.37501	0.039246	0.100247	0.012016
Woody-AM	0.1344	0.00193	0.07352	0.00166		Woody-AM	0.0356394	0.0096436	0.111276	0.016461		Woody-AM	0.100312	0.021806	0.111276	0.016461		Woody-AM	0.235472	0.030188	0.131029	0.011358
Woody-EcM	0.1303	0.00179	0.07649	0.00246		Woody-AM	0.0171908	0.0045073	0.143704	0.020905		Woody-AM	0.0879751	0.0117757	0.143704	0.020905		Woody-AM	0.231111	0.04696	0.125926	0.012346
Woody-AM	0.1679	0.00451	0.04836	0.00292		Woody-AM	0.0215933	0.0077568	0.147984	0.023209		Woody-AM	0.0976324	0.0307786	0.147984	0.023209		Woody-AM	0.377694	0.101971	0.111276	0.016461
Woody-EcM	0.1628	0.00195	0.05691	0.00287		Woody-AM	0.0265199	0.0027254	0.10321	0.011029		Woody-AM	0.107726	0.01595	0.10321	0.011029		Woody-AM	0.223732	0.02348	0.143704	0.020905
Woody-AM	0.1507	0.00072	0.06005	0.00178		Woody-AM	0.0283019	0.0036687	0.14535	0.013169		Woody-AM	0.0841745	0.0147663	0.14535	0.013169		Woody-AM	0.250901	0.05434	0.147984	0.023209
Woody-AM	0.1456	0.00211	0.06299	0.00163		Woody-AM	0.0235849	0.0083857	0.139918	0.016954		Woody-AM	0.078567	0.0206853	0.139918	0.016954		Woody-AM	0.349182	0.064067	0.10321	0.011029
Woody-AM	0.305	0.0215	0.08	0.002		Woody-AM	0.0403564	0.007652	0.107325	0.014321		Woody-AM	0.0923988	0.0100312	0.107325	0.014321		Woody-AM	0.299203	0.045619	0.14535	0.013169
Herb-AM	0.22	0.018	0.13	0.006		Woody-AM	0.0325996	0.0068134	0.138107	0.011852		Woody-AM	0.0711526	0.0107166	0.138107	0.011852		Woody-AM	0.258616	0.076478	0.139918	0.016954
Others	0.290507	0.0509845	0.109084	0.015605		Woody-AM	0.0263103	0.0059748	0.136296	0.022223		Woody-AM	0.0601869	0.0115265	0.136296	0.022223		Woody-AM	0.410231	0.061048	0.107325	0.014321
Others	0.334529	0.0234175	0.0903296	0.0146885		Woody-EcM	0.0227463	0.0052411	0.165926	0.023374		Woody-EcM	0.0710903	0.0136449	0.165926	0.023374		Woody-AM	0.296184	0.024487	0.138107	0.011852
Others	0.240436	0.029325	0.143333	0.019744		Woody-EcM	0.0359539	0.0055555	0.138107	0.022222		Woody-EcM	0.102492	0.022492	0.138107	0.022222		Woody-AM	0.265325	0.048973	0.136296	0.022223
Others	0.271238	0.0435305	0.111025	0.01663		Woody-EcM	0.0377358	0.0077569	0.121481	0.013334		Woody-EcM	0.125607	0.028038	0.121481	0.013334		Woody-EcM	0.214675	0.039245	0.165926	0.023374
Others	0.292827	0.0244725	0.114102	0.0177655		Woody-AM	0.0334382	0.0024109	0.177284	0.00823		Woody-AM	0.0758255	0.0094081	0.177284	0.00823		Woody-EcM	0.367631	0.072788	0.138107	0.022222
Others	0.204923	0.0312235	0.154359	0.0201835		Woody-AM	0.0422432	0.0041929	0.140412	0.016296		Woody-AM	0.105047	0.015763	0.140412	0.016296		Woody-EcM	0.390105	0.053333	0.121481	0.013334
Herb-AM	0.229598	0.024138	0.123851	0.015804		Woody-AM	0.0539832	0.0122642	0.130535	0.026173		Woody-AM	0.111963	0.027788	0.130535	0.026173		Woody-AM	0.335094	0.032537	0.177284	0.00823
Woody-AM	0.247989	0.031609	0.135345	0.021264		Woody-AM	0.018434	0.003283	0.111111	0.006061		Woody-AM	0.196358	0.0412565	0.0727891	0.00157796		Woody-AM	0.422306	0.063732	0.140412	0.016296
Others	0.346552	0.031609	0.113506	0.010919		Woody-EcM	0.017172	0.00202	0.352273	0.010101		Woody-AM	0.183081	0.019697	0.111111	0.006061		Woody-AM	0.398491	0.063396	0.130535	0.026173
Others	0.327586	0.060632	0.0979885	0.0086205		Woody-AM	0.0260864	0.0029136	0.337739	0.0307473		Woody-EcM	0.119949	0.004798	0.352273	0.010101		Woody-AM	0.336616	0.0282261	0.111111	0.006061
Woody-EcM	0.325575	0.020977	0.102874	0.012931		Woody-AM	0.0445925	0.00332103	0.257471	0.0256702		Woody-AM	0.0138596	0.0027973	0.337739	0.0307473		Woody-EcM	0.231818	0.0138912	0.352273	0.010101
Others	0.306609	0.01523	0.108333	0.011495		Woody-AM	0.0384568	0.00198762	0.159962	0.0142718		Woody-AM	0.0273392	0.00318715	0.257471	0.0256702		Woody-AM	0.124693	0.0105134	0.337739	0.0307473
Woody-EcM	0.221839	0.023851	0.152586	0.01523		Herb-AM	0.07925	0.00522838	0.046875	0.00581603		Woody-AM	0.0365887	0.00330407	0.159962	0.0142718		Woody-AM	0.2924	0.0202198	0.257471	0.0256702
Woody-EcM	0.231609	0.022127	0.168103	0.015805		Herb-AM	0.04	0.0011	0.16	0.01		Herb-AM	0.2045	0.0043229	0.046875	0.00581603		Woody-AM	0.286546	0.0171177	0.159962	0.0142718
Others	0.224713	0.021839	0.175862	0.012931		Herb-AM	0.07861	0.00472335	0.0538462	0.00703846		Herb-AM	0.29	0.008	0.16	0.01		Herb-AM	0.6145	0.0228699	0.046875	0.00581603
Woody-AM	0.381174	0.0295123	0.0863471	0.0145242		Herb-AM	0.0424333	0.00200462	0.1278	0.00440631		Herb-AM	0.191296	0.0172065	0.0538462	0.00703846		Herb-AM	0.6233	0.045	0.16	0.01
Herb-AM	0.270379	0.033487	0.105229	0.0168477		Others	0.0368	0.0004	0.1088	0.01		Herb-AM	0.1251	0.00517709	0.1278	0.00440631		Herb-AM	0.4373	0.014	0.0538462	0.00703846
Herb-AM	0.21445	0.00816708	0.09685	0.00866206								Others	0.119	0.002	0.1088	0.01		Herb-AM	0.3835	0.000166013	0.1278	0.00440631
Herb-AM	0.3995	0.0189225	0.1645	0.00831039														Others	0.395	0.012	0.1088	0.01
Others	0.2105	0.009	0.2045	0.01
Woody-AM	0.163333	0.0222777	0.101667	0.00892354
Woody-AM	0.143333	0.00892354	0.0783333	0.00360041
Woody-EcM	0.13	0.000354139	0.09	0.000613386
Herb-AM	0.1275	0.0123744	0.1005	0.00106066
Woody-EcM	0.2185	0.000353553	0.3865	0.0144957
Others	0.216667	0.00843333	0.0673333	0.00823333
Woody-AM	0.105667	0.00347478	0.0593333	0.00756209
Woody-AM	0.115	0.0020548	0.236	0.0236126
Others	0.11555	0.0037	0.053075	0.0018
Others	0.302737	0.01057	0.142863	0.0111313
Woody-EcM	0.167692	0.0134154	0.182	0.01547
Woody-EcM	0.162393	0.0129914	0.179	0.015215
Woody-EcM	0.236923	0.0189538	0.085	0.007225
Woody-EcM	0.21094	0.0168752	0.076	0.00646
Woody-AM	0.099	0.012	0.24	0.015
Woody-AM	0.12	0.012	0.15	0.008
Woody-AM	0.12	0.018	0.09	0.003
Woody-AM	0.16	0.009	0.23	0.009
Woody-AM	0.12	0.012	0.3	0.008
Woody-EcM	0.15	0.006	0.28	0.016
Woody-EcM	0.2	0.014	0.46	0.03
Woody-EcM	0.14	0.012	0.13	0.006
Woody-EcM	0.2	0.035	0.29	0.025
Woody-EcM	0.19	0.024	0.37	0.03
Woody-AM	0.13	0.09	0.07	0.015
Woody-AM	0.16	0.01	0.05	0.019
Woody-EcM	0.3	0.012	0.27	0.019
Woody-EcM	0.26	0.028	0.22	0.042
Woody-AM	0.192667	0.0143333	0.0653333	0.00466667
Woody-AM	0.211667	0.0106667	0.043	0.00166667
Woody-EcM	0.26	0.0133333	0.350667	0.02
Woody-EcM	0.302	0.0236667	0.189333	0.0106667
Woody-AM	0.166	0.014	0.146	0.016
Herb-AM	0.187	0.026	0.108	0.005
Herb-AM	0.1382	0.00217571	0.0929	0.000883721
Others	0.0768	0.0149	0.426532	0.0309278
Woody-EcM	0.24375	0.0235	0.3747	0.0252751
Woody-AM	0.1375	0.0175	0.1175	0.00625
Woody-AM	0.200667	0.0415273	0.0673333	0.00830439
Herb-AM	0.0861538	0.0218802	0.0683128	0.0057613
Herb-AM	0.0895726	0.0246154	0.0854321	0.006749
Herb-AM	0.126496	0.020854	0.0887243	0.0062551
Herb-AM	0.253333	0.043077	0.0793416	0.0136625
Herb-AM	0.136068	0.029744	0.103868	0.012346
Herb-AM	0.155897	0.032479	0.10535	0.014979
Woody-AM	0.211624	0.02188	0.100247	0.012016
Woody-AM	0.135726	0.021539	0.131029	0.011358
Woody-AM	0.116923	0.02188	0.125926	0.012346
Woody-AM	0.246154	0.073846	0.111276	0.016461
Woody-AM	0.119658	0.018462	0.143704	0.020905
Woody-AM	0.133333	0.027009	0.147984	0.023209
Woody-AM	0.218462	0.049572	0.10321	0.011029
Woody-AM	0.191111	0.030769	0.14535	0.013169
Woody-AM	0.160342	0.051966	0.139918	0.016954
Woody-AM	0.282393	0.050257	0.107325	0.014321
Woody-AM	0.19453	0.012649	0.138107	0.011852
Woody-AM	0.182222	0.033163	0.136296	0.022223
Woody-EcM	0.123077	0.02188	0.165926	0.023374
Woody-EcM	0.231453	0.049915	0.138107	0.022222
Woody-EcM	0.22906	0.029402	0.121481	0.013334
Woody-AM	0.228034	0.023932	0.177284	0.00823
Woody-AM	0.277265	0.055043	0.140412	0.016296
Woody-AM	0.234188	0.055385	0.130535	0.026173
Woody-AM	0.137043	0.00581733	0.0727891	0.00157796
Woody-AM	0.135101	0.019949	0.111111	0.006061
Woody-EcM	0.094697	0.0128788	0.352273	0.010101
Herb-AM	0.322861	0.00845851	0.0216575	0.00246632
Woody-AM	0.0847465	0.0095517	0.337739	0.0307473
Woody-AM	0.220468	0.0195905	0.257471	0.0256702
Woody-AM	0.211501	0.016618	0.159962	0.0142718
Herb-AM	0.33075	0.0172298	0.046875	0.00581603
Herb-AM	0.284267	0.0212222	0.125556	0.00998889
Herb-AM	0.29	0.018	0.16	0.01
Herb-AM	0.158232	0.0107962	0.0538462	0.00703846
Herb-AM	0.215967	0.0116272	0.1278	0.00440631
Others	0.239	0.011	0.1088	0.01
